# Supplementary material
Source: PubMed Central journal article supplement (PMC3891660)

# Fully Reagent-Controlled Asymmetric Synthesis of (-)-Spongidepsin via the Zr-Catalyzed Asymmetric Carboalumination of Alkenes (ZACA Reaction)

Ganguo Zhu and Ei-ichi Negishi\*

*Herbert C. Brown Laboratories of Chemistry, Purdue University,  
560 Oval Dr., West Lafayette, Indiana, USA, 47907-2084*

## Supporting Information

### Table of contents

|                                       |         |
|---------------------------------------|---------|
| General Experiment-----               | S1      |
| General Procedures and Text Part----- | S2-S16  |
| NMR Spectrum-----                     | S17-S61 |

**General.** THF and ether were distilled from sodium and benzophenone. CH<sub>2</sub>Cl<sub>2</sub> was distilled from CaH<sub>2</sub>. Flash chromatographic separation was carried out on 230–400 mesh silica gel 60. Gas chromatography was performed on an HP 6890 Gas Chromatograph using an HP-5 capillary column (30 m × 0.32 mm, 0.5 μm film) with appropriate hydrocarbons as internal standards. <sup>1</sup>H and <sup>13</sup>C NMR spectra were recorded in CDCl<sub>3</sub> on a Varian Inova-300 spectrometer. Optical rotations were measured on an Autopol III automatic polarimeter. ZnBr<sub>2</sub> and Zn(OTf)<sub>2</sub> were flame-dried under vacuum prior to use. (+)- and (-)-(NMI)<sub>2</sub>ZrCl<sub>2</sub><sup>[a]</sup> as well as Pd(DPEphos)Cl<sub>2</sub><sup>[b]</sup> were prepared as reported in the literature.

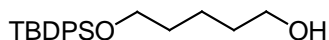

#### **5-*tert*-Butyldiphenylsilyloxy-1-pentanol. Representative Procedure A**

This compound was prepared by a literature method<sup>[c]</sup> with a modification involving the use of ten-fold excess of inexpensive 1,5-pentanediol rather than one equivalent leading to higher product yield. To a solution of 43 mL (500 mmol) of 1,5-pentanediol and 4.1 g (60 mmol) of imidazole in 200 mL of DMF was added dropwise 13 mL (50 mmol) of *tert*-butyldiphenylchlorosilane over 2 h at 0 °C. After stirring for 3 h at 23 °C, the reaction mixture was quenched with 200 mL of water, extracted with ether, dried over MgSO<sub>4</sub>, and concentrated. Purification by column chromatography (silica gel, 70/30 hexanes-EtOAc) afforded 15.7 g (92%) of the title compound as a colorless oil: <sup>1</sup>H NMR (300 MHz, CDCl<sub>3</sub>) δ 1.14 (s, 9 H), 1.4-1.75 (m, 6 H), 1.95-2.15 (m, 1 H), 3.65 (t, *J* = 6.6 Hz, 2 H), 3.76 (t, *J* = 6.6 Hz, 2 H), 7.4-7.55 (m, 6 H), 7.7-7.85 (m, 4 H); <sup>13</sup>C NMR (75 MHz, CDCl<sub>3</sub>) δ 19.11, 21.86, 26.78 (3 C), 32.17, 32.28, 62.63, 63.69, 127.50 (4 C), 129.44 (2 C), 133.91 (2 C), 135.45 (4 C).

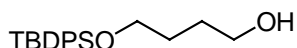

#### **4-*tert*-Butyldiphenylsilyloxy-1-butanol.**

The title compound was prepared according to Representative Procedure A except that 0.9 g (10 mmol) of 1,4-butanediol was used in place of 1,5-pentanediol to afford 3.0 g (90%) of the desired product; <sup>1</sup>H NMR (300 MHz, CDCl<sub>3</sub>) δ 1.25 (s, 9 H), 1.75-1.9 (m, 4 H), 3.0-3.15 (m, 1 H), 3.75-3.85 (m, 4 H), 7.5-7.6 (m, 6 H), 7.8-7.9 (m, 4 H); <sup>13</sup>C NMR (75 MHz, CDCl<sub>3</sub>) δ 19.03, 26.72 (3 C), 29.11, 29.47, 62.37, 63.86, 127.53 (4 C), 129.53 (2 C), 133.54 (2C), 135.42 (4 C).

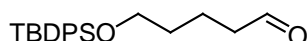

#### **5-*tert*-Butyldiphenylsilyloxy-1-pentanal. Representative Procedure B**

This compound was prepared by the Swern oxidation<sup>[d]</sup>, as follows. To a solution of 5.2 mL (60 mmol) of oxalyl chloride in 100 mL of CH<sub>2</sub>Cl<sub>2</sub> was added slowly a solution of 7.1 mL (100 mmol) of DMSO in 20 mL of CH<sub>2</sub>Cl<sub>2</sub> at -78 °C. After stirring for 15 min, 15.6 g (46 mmol) of 5-*tert*-butyldiphenylsilyloxy-1-pentanol in 30 mL of CH<sub>2</sub>Cl<sub>2</sub> was added to the above solution. After stirring at -78 °C for 1 h, 14 mL (100 mmol) of Et<sub>3</sub>N was added at -78 °C. The reaction mixture was slowly warmed to 23 °C, quenched with saturated aqueous NH<sub>4</sub>Cl, extracted with CH<sub>2</sub>Cl<sub>2</sub>, dried over MgSO<sub>4</sub>, and concentrated. Purification by column chromatography (silica gel, 95/5 hexanes-EtOAc) afforded 14.4 g (92%) of the desired aldehyde as a colorless oil; <sup>1</sup>H NMR (300 MHz, CDCl<sub>3</sub>) δ 1.27 (s, 9 H), 1.7-1.85 (m, 4 H), 2.52 (t, *J* = 6.6 Hz, 2 H), 3.87 (t, *J* = 6.3 Hz, 2 H), 7.5-7.6 (m, 6 H), 7.85-7.9 (m, 4 H), 9.84 (s, 1 H); <sup>13</sup>C NMR (75 MHz, CDCl<sub>3</sub>) δ 18.30, 18.97, 26.66 (3 C), 31.58, 43.17, 63.05, 127.45 (4 C), 129.41 (2 C), 133.56 (2 C), 135.31 (4 C), 202.10.

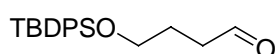

#### **4-*tert*-Butyldiphenylsilyloxy-1-butanal.**

The title compound was prepared according to Representative Procedure B except that 3.0 g (9 mmol) of 4-*tert*-butyldiphenylsilyloxy-1-butanol was used in place of 5-*tert*-butyldiphenylsilyloxy-1-pentanol to afford 2.6 g (88%) of the desired product; <sup>1</sup>H NMR (300 MHz, CDCl<sub>3</sub>) δ 1.11 (s, 9 H), 1.9-2.0 (m, 2 H), 2.57 (td, *J* = 6.9, 1.5 Hz, 2 H), 3.74 (t, *J* = 6.0 Hz, 2 H), 7.4-7.5 (m, 6 H), 7.7-7.75 (m, 4 H), 9.81 (t, *J* = 1.5 Hz, 1 H); <sup>13</sup>C NMR (75 MHz, CDCl<sub>3</sub>) δ 19.06, 25.12, 26.72 (3 C), 40.62, 62.80, 127.59 (4 C), 129.58 (2 C), 133.46 (2 C), 135.42 (4 C), 202.21.

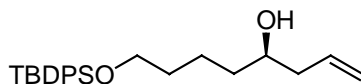

#### **(4*R*)-8-*tert*-Butyldiphenylsilyloxy-1-octen-4-ol (8). Representative Procedure C**

Allylboration of 5-*tert*-butyldiphenylsilyloxy-1-pentanal was carried out by the Brown

allylboration.<sup>[e]</sup> To a suspension of 9.5 g (30 mmol) of (-)-Ipc<sub>2</sub>B(OMe) in 150 mL of ether was added 30 mL (30 mmol) of 1.0 M solution of allylmagnesium bromide in ether at -78 °C. After stirring for 15 min at -78 °C, the reaction mixture was warmed to 23 °C and kept at this temperature for 1 h. A solution of 8.5 g (25 mmol) of 5-*tert*-butyldiphenylsilyloxy-1-pentanal in 30 mL of ether was added at -78 °C. After stirring for 2 h at -78 °C, the reaction mixture stirred at 23 °C for 2 h, which was followed by addition of 50 mL of 2 N NaOH and 30 mL of 50% H<sub>2</sub>O<sub>2</sub>. After stirring overnight at 23 °C, the reaction mixture was extracted with ether, washed with brine, dried over MgSO<sub>4</sub>, and concentrated. Purification by column chromatography (silica gel, 90/10 hexanes-EtOAc) afforded 8.3 g (87%) of the title compound as a colorless oil:  $[\alpha]_D^{23} = +2.7$  (*c*, 1.4, CHCl<sub>3</sub>); <sup>1</sup>H NMR (300 MHz, CDCl<sub>3</sub>) δ 1.09 (s, 9 H), 1.4-1.7 (m, 6 H), 2.1-2.4 (m, 2 H), 3.6-3.75 (m, 3 H), 5.1-5.2 (m, 2 H), 5.8-5.95 (m, 1 H), 7.4-7.5 (m, 6 H), 7.7-7.75 (m, 4 H); <sup>13</sup>C NMR (75 MHz, CDCl<sub>3</sub>) δ 19.17, 21.86, 26.83 (3 C), 32.45, 36.43, 41.85, 63.75, 70.54, 118.02, 127.56 (4 C), 129.50 (2 C), 134.02 (2 C), 134.83, 135.53 (4 C); HRMS calcd. for C<sub>24</sub>H<sub>35</sub>O<sub>2</sub>Si [M+H]<sup>+</sup>: 383.2401, found: 383.2409.

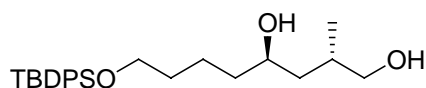

**(2*S*,4*R*)-8-*tert*-Butyldiphenylsilyloxy-2-methyl-1,4-octanediol (9). Representative Procedure D**

1.911 g (5 mmol) of (4*R*)-8-*tert*-butyldiphenylsilyloxy-1-octen-4-ol dissolved in 5 mL of CH<sub>2</sub>Cl<sub>2</sub> was mixed with 0.5 mL (5 mmol) of Me<sub>3</sub>Al in 5 mL of CH<sub>2</sub>Cl<sub>2</sub> at -78 °C, and the mixture was warmed to 23 °C and stirred for 1 h to generate the Me<sub>2</sub>Al-protected alkenol. In a separate reactor, 1.5 mL (15 mmol) of Me<sub>3</sub>Al in 5 mL of CH<sub>2</sub>Cl<sub>2</sub> was treated with 90 μL (5 mmol) of H<sub>2</sub>O to partially convert Me<sub>3</sub>Al to methylaluminumoxane (MAO).<sup>[f]</sup> To this was added 167 mg (0.25 mmol) of (+)-(NMI)<sub>2</sub>ZrCl<sub>2</sub>. To a wine-red solution thus formed was added the Me<sub>2</sub>Al-protected alkenol solution in CH<sub>2</sub>Cl<sub>2</sub>, and the resultant mixture was

stirred overnight at 23 °C. After confirming the total consumption of the starting alkenol by GC, the mixture was treated at 0 °C with a stream of oxygen bubbled through at the rate of 5 mL per min for 1 h and further stirred at 23 °C for 6 h under O<sub>2</sub> atmosphere. It was quenched with 2 N NaOH, extracted with CH<sub>2</sub>Cl<sub>2</sub>, washed with saturated aqueous NH<sub>4</sub>Cl and brine, dried over MgSO<sub>4</sub>, and concentrated. After passing it through a short path column of silica gel using EtOAc as an eluent remove metal-containing impurities, evaporation provided 1.5 g (73%) of the crude product, which essentially consisted of the desired product and its diastereomers (dr = 3.5/1). Purification by column chromatography (silica gel, 95/5–85/15 hexanes-EtOAc) provided 872 mg (42%) of the desired product (dr = 40/1, by <sup>13</sup>C NMR); [ $\alpha$ ]<sub>D</sub><sup>23</sup> = -7.5 (*c*, 2.1, CHCl<sub>3</sub>), <sup>1</sup>H NMR (300 MHz, CDCl<sub>3</sub>)  $\delta$  0.91 (d, *J* = 6.9 Hz, 3 H), 1.07 (s, 9 H), 1.4-1.9 (m, 9 H), 3.05-3.3 (m, 2 H), 3.37 (dd, *J* = 10.5, 7.8 Hz, 1 H), 3.57 (dd, *J* = 10.5, 4.8 Hz, 1 H), 3.65-3.7 (m, 1 H), 3.69 (t, *J* = 6.3 Hz, 2 H), 7.35-7.5 (m, 6 H), 7.65-7.7 (m, 4 H); <sup>13</sup>C NMR (75 MHz, CDCl<sub>3</sub>)  $\delta$  18.05, 19.14, 21.86, 26.83 (3 C), 32.39, 34.53, 38.12, 43.09, 63.75, 68.69, 70.85, 127.53 (4 C), 129.50 (2 C), 133.96 (2 C), 135.51 (4 C); HRMS (ESI) calcd. for C<sub>25</sub>H<sub>38</sub>NaO<sub>3</sub>Si [M+Na]<sup>+</sup>: 437.2482, found: 437.2489.

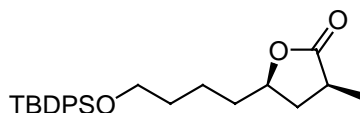

**(2*S*,4*R*)-4-[4'-(*tert*-Butyldiphenylsilyloxy)butyl]-2-methyl- $\gamma$ -butyrolactone (10).**

A solution of 830 mg (2 mmol) of (2*S*,4*R*)-8-*tert*-butyldiphenylsilyloxy-2-methyl-1,4-octanediol in 10 mL of CH<sub>2</sub>Cl<sub>2</sub> and 3 mL of H<sub>2</sub>O was added 31 mg (0.2 mmol) of TEMPO (2,2,6,6-tetramethyl-1-piperidinyloxy) and 1.4 g (4.4 mmol) of PhI(OAc)<sub>2</sub>. After stirring for 2 h at 23 °C, the reaction mixture was quenched with saturated aqueous NaHCO<sub>3</sub>, extracted with CH<sub>2</sub>Cl<sub>2</sub>, washed with brine, dried over MgSO<sub>4</sub>, and concentrated. Purification by column chromatography (silica gel, 80/20 hexanes-EtOAc) afforded 722 mg (88%) of the desired product as a colorless oil; [ $\alpha$ ]<sub>D</sub><sup>23</sup> = +5.9 (*c*, 1.0, CHCl<sub>3</sub>); <sup>1</sup>H NMR

(300 MHz, CDCl<sub>3</sub>)  $\delta$  1.05 (s, 9 H), 1.26 (d,  $J$  = 6.3 Hz, 3 H), 1.4-1.8 (m, 7 H), 2.4-2.7 (m, 2 H), 3.67 (t,  $J$  = 6.0 Hz, 2 H), 4.25-4.35 (m, 1 H), 7.35-7.45 (m, 6 H), 7.6-7.7 (m, 4 H); <sup>13</sup>C NMR (75 MHz, CDCl<sub>3</sub>)  $\delta$  14,68, 18,75, 21.22, 26.41 (3 C), 31.69, 34.75, 35.45, 36.88, 63.05, 78.15, 127.17 (4 C), 129.13 (2 C), 133.46 (2 C), 135.08 (4 C), 179.13; HRMS calcd. for C<sub>25</sub>H<sub>35</sub>O<sub>3</sub>Si [M+H]<sup>+</sup>: 411.2350, found: 411.2354.

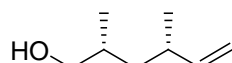

**(2R,4S)-2,4-Dimethyl-5-hexen-1-ol**

To a solution of 1.1 mL (13 mmol) of oxalyl chloride in 20 mL of CH<sub>2</sub>Cl<sub>2</sub> was added dropwise a solution of 1.4 mL (20 mmol) of DMSO in 5 mL of CH<sub>2</sub>Cl<sub>2</sub> at -78 °C. After stirring for 15 min at -78 °C, 2.5 g (10 mmol) of (2R,4S)-5-*tert*-butyldimethylsilyloxy-2,4-dimethyl-1-pentanol<sup>[8]</sup> in 10 mL of CH<sub>2</sub>Cl<sub>2</sub> was added. After stirring at -78 °C for 1 h, 3.5 mL (25 mmol) of Et<sub>3</sub>N was added at -78 °C. Then the reaction mixture stirred at 23 °C for 3 h and quenched with 30 mL of water, extracted with ether, washed with brine, dried over MgSO<sub>4</sub>, and concentrated. Purification by column chromatography (silica gel, 95/5 hexanes-EtOAc) afforded 2.0 g (89%) of the desired aldehyde as a colorless oil.

To a solution of 7.1 g (20 mmol) of methyl triphenyl phosphonium bromide in 40 mL of THF under argon was added 8 mL (20 mmol) of 2.5 M *n*-BuLi solution in hexanes at 0 °C. After stirring at 0 °C for 30 min, the above aldehyde in 10 mL of THF was added. The reaction mixture was warmed to at 23 °C over 3 h then quenched with saturated aqueous NH<sub>4</sub>Cl, extracted with ether, washed with brine, dried over MgSO<sub>4</sub>, and concentrated. The residue mixture was filtered on a plug of silica gel (5 cm), washed with ether, and concentrated to afford the crude alkenes product.

To a solution of the crude alkenes in 10 mL of THF was added 6 mL (6 mmol) of 1.0 M solution of TBAF in THF. After stirring for 3 h at 23 °C, the reaction mixture was quenched with saturated aqueous NH<sub>4</sub>Cl, extracted with ether, washed with brine, dried

over MgSO<sub>4</sub>, and concentrated. Purification by column chromatography (silica gel, 67/33 hexanes-EtOAc) afforded 360 mg (84%, 2 steps) of the desired alcohol<sup>[h]</sup> as a colorless oil;  $[\alpha]_D^{23} = +35.7$  (*c*, 2.0, CHCl<sub>3</sub>);<sup>[h]</sup> <sup>1</sup>H NMR (300 MHz, CDCl<sub>3</sub>)  $\delta$  0.88 (d, *J* = 6.9 Hz, 3 H), 1.00 (d, *J* = 7.2 Hz, 3 H), 1.0-1.1 (m, 1 H), 1.3-1.45 (m, 1 H), 1.5-1.7 (m, 1 H), 2.2-2.3 (m, 1 H), 3.2-3.45 (m, 3 H), 4.85-5.0 (m, 2 H), 5.61 (m, 1 H); <sup>13</sup>C NMR (75 MHz, CDCl<sub>3</sub>)  $\delta$  16.19, 21.30, 33.15, 35.34, 40.20, 68.10, 112.65, 144.21.

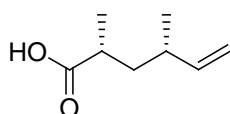

**(2*R*,4*S*)-2,4-Dimethyl-5-hexenoic acid (2)**

To a solution of 350 mg (2.7 mmol) of (2*R*,4*S*)-2,4-dimethyl-5-hexen-1-ol in 10 mL of DMF was added 4.1 g (10.8 mmol) of pyridinium dichromate at 0 °C. After stirring overnight at 23 °C, the reaction mixture was quenched with 2 mL of saturated aqueous Na<sub>2</sub>S<sub>2</sub>O<sub>3</sub> and 20 mL of brine, extracted with EtOAc, dried over MgSO<sub>4</sub>, and concentrated. Purification by column chromatography (silica gel, 80/20 hexanes-EtOAc) afforded 301 mg (77%) of the desired acid<sup>[h]</sup> as a colorless oil;  $[\alpha]_D^{23} = -6.2$  (*c*, 1.1, CHCl<sub>3</sub>);<sup>[h]</sup> <sup>1</sup>H NMR (300 MHz, CDCl<sub>3</sub>)  $\delta$  1.02 (d, *J* = 6.6 Hz, 3 H), 1.16 (d, *J* = 6.3 Hz, 3 H), 1.3-1.45 (m, 1 H), 1.7-1.85 (m, 1 H), 2.15-2.3 (m, 1 H), 2.45-2.55 (m, 1 H), 4.9-5.05 (m, 2 H), 5.55-5.7 (m, 1 H), 11.3-11.7 (m, 1 H); <sup>13</sup>C NMR (75 MHz, CDCl<sub>3</sub>)  $\delta$  16.61, 20.57, 35.79, 37.22, 39.92, 113.55, 143.37, 183.74.

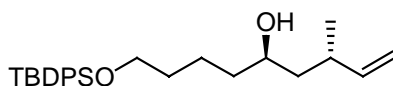

**(3*S*,5*R*)-9-*tert*-Butyldiphenylsilyloxy-3-methyl-1-nonen-5-ol (3)**

To a solution of 718 mg (1.75 mmol) of (2*S*,4*R*)-4-[4'-(*tert*-butyldiphenylsilyloxy)butyl]-2-methyl- $\gamma$ -butyrolactone in 20 mL of CH<sub>2</sub>Cl<sub>2</sub> under argon was added dropwise 3.5 mL (3.5 mmol) of 1.0 M solution of

DIBAL-H in CH<sub>2</sub>Cl<sub>2</sub> at -78 °C. After stirring for 30 min at -78 °C, the reaction mixture was quenched with 10 mL of MeOH. The resultant mixture was allowed to warm to 23 °C over 1 h until a white precipitate appeared. The residue was filtered on a pad of celite, washed with ether, and concentrated to give the crude lactol, which was directly used in the next step.

To a solution of 2.8 g (8 mmol) of methyl triphenyl phosphonium bromide in 30 mL of THF under argon was added 3.2 mL (8 mmol) of 2.5 M solution of n-BuLi in hexanes at 0 °C. After stirring at 0 °C for 30 min, the crude lactol in 10 mL of THF was added. After stirring further 3 h at 23 °C, the reaction mixture was quenched with saturated aqueous NH<sub>4</sub>Cl, extracted with ether, washed with brine, dried over MgSO<sub>4</sub>, and concentrated. Purification by column chromatography (silica gel, 80/20 hexanes-EtOAc) gave 524 mg (73%) of alcohol as a colorless oil; [ $\alpha$ ]<sub>D</sub><sup>23</sup> = -2.8 (*c*, 1.0, CHCl<sub>3</sub>); <sup>1</sup>H NMR (300 MHz, CDCl<sub>3</sub>)  $\delta$  1.07 (d, *J* = 6.9 Hz, 3 H), 1.12 (s, 9 H), 1.4-1.7 (m, 8 H), 2.3-2.5 (m, 1 H), 3.6-3.7 (m, 1 H), 3.73 (t, *J* = 6.6 Hz, 2 H), 4.95-5.1 (m, 2 H), 5.73 (ddd, *J* = 17.1, 10.2, 8.4 Hz, 1 H), 7.35-7.5 (m, 6 H), 7.7-7.8 (m, 4 H); <sup>13</sup>C NMR (75 MHz, CDCl<sub>3</sub>)  $\delta$  19.14, 21.16, 21.81, 26.83 (3 C), 32.45, 34.67, 37.56, 44.15, 63.72, 69.53, 113.36, 127.53 (4 C), 129.44 (2 C), 133.96 (2 C), 135.51 (4 C), 144.10; HRMS calcd. for C<sub>26</sub>H<sub>39</sub>O<sub>2</sub>Si [M+H]<sup>+</sup>: 411.2714, found: 411.2709.

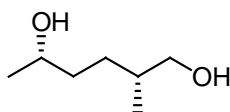

**(2*R*,5*S*)-2-Methyl-1,5-hexanediol (17a).**

The title compound was prepared according Representative Procedure D except that 200 mg (2 mmol) of (*S*)-(+)-hexen-2-ol (>98% *ee*, commercial available from Aldrich) and 67 mg (0.1 mmol) of (-)-(NMI)<sub>2</sub>ZrCl<sub>2</sub> was used to afford 206 mg (78%) of the desired product **17a** (*dr* = 7.7/1, by <sup>13</sup>C NMR); <sup>1</sup>H NMR (300 MHz, CDCl<sub>3</sub>)  $\delta$  0.81 (d, *J* = 6.3 Hz, 3 H), 1.11 (d, *J* = 6.3 Hz, 3 H), 1.15-1.6 (m, 5 H), 3.25-3.4 (m, 4 H), 3.65-3.75 (m, 1 H);



$^{13}\text{C}$  NMR (75 MHz,  $\text{CDCl}_3$ )  $\delta$  16.33 (16.67), 23.21, 28.52 (29.02), 34.97, 35.62 (36.29), 67.26, 67.40, (68.05).

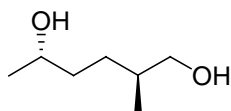

**(2*S*,5*S*)-2-Methyl-1,5-hexanediol (17b).**

The title compound was prepared according Representative Procedure D except that 200 mg (2 mmol) of (*S*)-(+)-hexen-2-ol (>98% *ee*, commercial available from Aldrich) and 67 mg (0.1 mmol) of (+)-(NMI)<sub>2</sub>ZrCl<sub>2</sub> was used to afford 208 mg (79%) of the desired product **17b** (*dr* = 4.5/1, by  $^{13}\text{C}$  NMR);  $^1\text{H}$  NMR (300 MHz,  $\text{CDCl}_3$ )  $\delta$  0.82 (d, *J* = 6.6 Hz, 3 H), 1.11 (d, *J* = 6.3 Hz, 3 H), 1.0-1.6 (m, 5 H), 3.3-3.4 (m, 2 H), 3.5-3.9 (m, 3 H);  $^{13}\text{C}$  NMR (75 MHz,  $\text{CDCl}_3$ )  $\delta$  16.67 (16.36), 23.27, 29.02 (28.55), 35.56 (35.00), 36.32, 67.14, 68.05 (67.43).

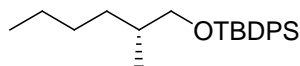

**(2*R*)-1-*tert*-Butyldiphenylsilyloxy-2-methyl-hexane**

To a solution of 530 mg (4.0 mmol) of (2*R*,5*S*)-2-methyl-1,5-hexanediol and 408 mg (6.0 mmol) of imidazole in 20 mL of DMF was added dropwise 1.0 mL (4.0 mmol) of TBDPSCl. After stirring for 3 h at 23 °C, the reaction mixture was quenched with 20 mL of H<sub>2</sub>O, extracted with ether, dried over MgSO<sub>4</sub>, and concentrated. Purification by column chromatography (silica gel, 80/20 hexanes-EtOAc) afforded 1.3 g (91%) of the desired secondary alcohol as a colorless oil.

To a solution of 1.2 g (3.2 mmol) of the alcohol prepared above, 40 mg (0.3 mmol) of DMAP (4-dimethylaminopyridine), and 0.9 mL (6 mmol) of Et<sub>3</sub>N in 10 mL of CH<sub>2</sub>Cl<sub>2</sub> was added 0.4 mL (5 mmol) of MsCl at 0 °C. After stirring at 23 °C for 3 h, the reaction mixture was quenched with water, extracted with ether, dried over MgSO<sub>4</sub>, filtered on a plug of silica gel (3 cm), washed with ether, and concentrated to afford the crude

mesylate.

To a solution of the mesylate prepared above in 30 mL of dry ether was added 400 mg (10.5 mmol) of lithium aluminium hydride at 0 °C. After stirring overnight at 23 °C, the reaction mixture was quenched with 2 mL of water, then acidified with 5% HCl, extracted with ether, dried over MgSO<sub>4</sub>, and concentrated. Purification by column chromatography (silica gel, 97/3 hexanes-EtOAc) afforded 259 mg (70%) of the desired product as a colorless oil; <sup>1</sup>H NMR (300 MHz, CDCl<sub>3</sub>) δ 0.9-1.1 (m, 6 H), 1.18 (s, 9 H), 1.3-1.8 (m, 7 H), 3.5-3.7 (m, 2 H), 7.45-7.55 (m, 6 H), 7.75-8.05 (m, 4 H); <sup>13</sup>C NMR (75 MHz, CDCl<sub>3</sub>) δ 14.12, 16.95, 19.34, 22.99, 26.89 (3 C), 29.22, 32.84, 35.70, 68.94, 127.56 (4 C), 129.47 (2 C), 134.13 (2 C), 135.65(4 C).

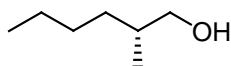

#### **(2R)-2-Methyl-1-hexanol**

To a solution of 555 mg (1.5 mmol) of (2R)-1-*tert*-butyldiphenylsilyloxy-2-methyl-hexane in 3 mL of THF was added 2 mL (2 mmol) of 1.0 M solution of TBAF in THF. After stirring at 23 °C for 3 h, the reaction mixture was quenched with saturated aqueous NH<sub>4</sub>Cl, extracted with ether, washed with brine, dried over MgSO<sub>4</sub>, and concentrated. Purification by column chromatography (silica gel, 70/30 hexanes-EtOAc) afforded 134 mg (78%) of the desired alcohol<sup>[i]</sup> as a colorless oil; optical purity by Mosher ester analysis, 77% *ee*; <sup>1</sup>H NMR (300 MHz, CDCl<sub>3</sub>) δ 0.8-0.95 (m, 6 H), 1.0-1.6 (m, 7 H), 2.65-3.05 (m, 1 H), 3.25-3.5 (m, 2 H); <sup>13</sup>C NMR (75 MHz, CDCl<sub>3</sub>) δ 13.95, 16.47, 22.90, 29.14, 32.81, 35.59, 67.99.

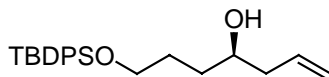

#### **(4R)-7-*tert*-Butyldiphenylsilyloxy-1-hepten-4-ol (15)**

The title compound was prepared according to Representative Procedure C except that

2.5 g (7.5 mmol) of 4-*tert*-butyldiphenylsilyloxy-1-butanal was used to afford 2.3 g (83%) of desired product (**15**); <sup>1</sup>H NMR (300 MHz, CDCl<sub>3</sub>) δ 0.98 (s, 9 H), 1.45-1.65 (m, 4 H), 2.05-2.25 (m, 3 H), 3.6-3.65 (m, 3 H), 5.0-5.1 (m, 2 H), 5.7-5.85 (m, 1 H), 7.3-7.4 (m, 6 H), 7.55-7.65 (m, 4 H); <sup>13</sup>C NMR (75 MHz, CDCl<sub>3</sub>) δ 19.06, 26.75 (3 C), 28.66, 33.37, 41.82, 63.97, 70.38, 117.59, 127.53 (4 C), 129.50 (2 C), 133.57 (2 C), 134.89, 135.45 (4 C); MS (CI): 369 (1.5), 351 (3.4), 327 (5.0), 179 (100).

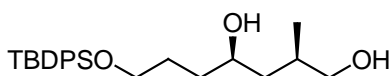

**(2*R*,4*R*)-7-*tert*-Butyldiphenylsilyloxy-2-methyl-1,4-heptanediol (18a).**

The title compound was prepared according Representative Procedure D except that 1.8 g (5 mmol) of **15** and 168 mg (0.25 mmol) of (–)-(NMI)<sub>2</sub>ZrCl<sub>2</sub> was used to afford 1.3 g (67%) of **18a** (dr = 5.5/1, by <sup>13</sup>C NMR); the product was further purified by column chromatography (silica gel, 85/15 hexanes-EtOAc) to give 782 mg (40%) of **18a** (dr = 40/1, by <sup>13</sup>C NMR); [α]<sub>D</sub><sup>23</sup> = +1.2 (*c*, 1.5, CHCl<sub>3</sub>); <sup>1</sup>H NMR (300 MHz, CDCl<sub>3</sub>) δ 0.96 (d, *J* = 6.9 Hz, 3 H), 1.09 (s, 9 H), 1.5-2.0 (m, 7 H), 3.45-3.6 (m, 2 H), 3.73 (t, *J* = 5.7 Hz, 2 H), 3.8-3.95 (m, 2 H), 7.35-7.5 (m, 6 H), 7.65-7.75 (m, 4 H); <sup>13</sup>C NMR (75 MHz, CDCl<sub>3</sub>) δ 17.37, 19.09, 26.75 (3 C), 29.02, 32.14, 34.61, 41.88, 64.31, 67.82, 68.75, 127.64 (4 C), 129.64 (2 C), 133.43 (2 C), 135.51 (4 C); HRMS (ESI) calcd. for C<sub>24</sub>H<sub>36</sub>NaO<sub>3</sub>Si [M+Na]<sup>+</sup>: 423.2326, found: 423.2335.

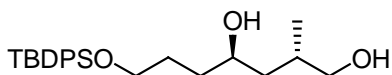

**(2*S*,4*R*)-7-*tert*-Butyldiphenylsilyloxy-2-methyl-1,4-heptanediol (18b).**

The title compound was prepared according Representative Procedure D except that 1.8 g (5 mmol) of **15** and 168 mg (0.25 mmol) of (–)-(NMI)<sub>2</sub>ZrCl<sub>2</sub> was used to afford 1.4 g (69%) of **18b** (dr = 3.5/1, by <sup>13</sup>C NMR); the product was further purified by column chromatography (silica gel, 85/15 hexanes-EtOAc) to give 700 mg (35%) of **18b** (dr = 40/1, by <sup>13</sup>C NMR); [α]<sub>D</sub><sup>23</sup> = –6.9 (*c*, 1.0, CHCl<sub>3</sub>); <sup>1</sup>H NMR (300 MHz, CDCl<sub>3</sub>) δ 0.89 (d,

$J = 6.9$  Hz, 3 H), 1.03 (s, 9 H), 1.4-1.9 (m, 7 H), 3.38 (dd,  $J = 7.5$  Hz, 1 H), 3.3-3.4 (m, 1 H), 3.56 (dd,  $J = 7.5$  Hz, 1 H), 3.68 (t,  $J = 5.4$  Hz, 2 H), 3.7-3.8 (m, 1 H), 7.3-7.45 (m, 6 H), 7.4-7.5 (m, 4 H);  $^{13}\text{C}$  NMR (75 MHz,  $\text{CDCl}_3$ )  $\delta$  18.21, 19.09, 26.78 (3 C), 28.85, 34.81, 35.68, 43.42, 64.34, 68.80, 70.74, 127.67 (4 C), 129.67 (2 C), 133.40 (2 C), 135.51 (4 C).

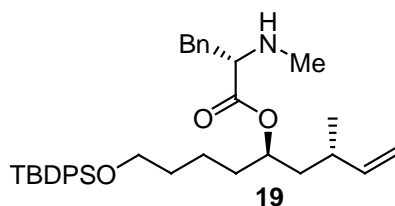

### Compound 19

To a solution of 420 mg (1.5 mmol) of (*S*)-*N*-Boc-methylphenylalanine, 411 mg (1.0 mmol) of **3** and 24 mg (0.2 mmol) of DMAP (4-dimethylaminopyridine) in 5 mL of  $\text{CH}_2\text{Cl}_2$  was added a solution of 4.2 g (2.0 mmol) of DCC in 5 mL of  $\text{CH}_2\text{Cl}_2$ . After stirring overnight, the reaction mixture was filtered on a pad of celite, washed with ether. The residue was concentrated and purified by column chromatography (silica gel, 95/5 hexanes-EtOAc) to give 597 mg (89%) of the coupled product as a colorless oil.

To a solution of 503 mg (0.75 mmol) of the above amide in 2 mL of dry  $\text{CH}_2\text{Cl}_2$  under argon was added 0.6 mL (7.5 mmol) of  $\text{CF}_3\text{CO}_2\text{H}$  at 0 °C. After stirring for 3 h at 23 °C, the reaction mixture was quenched with saturated aqueous  $\text{NaHCO}_3$ , extracted with EtOAc, washed with brine, dried over  $\text{Na}_2\text{SO}_4$ , and concentrated. Purification by column chromatography (silica gel, 60/40 hexanes-EtOAc) gave 590 mg of the desired product<sup>[h]</sup> (87%) as a colorless oil;  $^1\text{H}$  NMR (300 MHz,  $\text{CDCl}_3$ )  $\delta$  1.09 (d,  $J = 6.6$  Hz, 3 H), 1.18 (s, 9 H), 1.2-1.8 (m, 8 H), 2.2-2.3 (m, 1 H), 2.48 (s, 3 H), 3.0-3.15 (m, 2 H), 3.5-3.6 (m, 1 H), 3.7-3.8 (m, 2 H), 5.0-5.25 (m, 3 H), 5.75-5.9 (m, 1 H), 7.25-7.35 (m, 5 H), 7.45-7.55 (m, 6 H), 7.75-7.85 (m, 4 H).

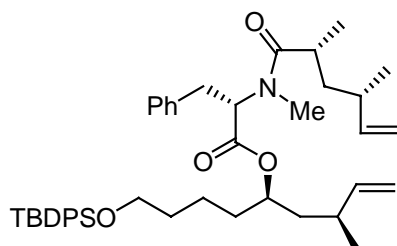

### Compound 21

To a solution of 372 mg (0.65 mmol) of **19** and 128 mg (0.90 mmol) of **2** in 5 mL of  $\text{CH}_2\text{Cl}_2$  was added 45 mg (0.30 mmol) of HOBT (1-hydroxybenzotriazole), 550 mg (3.0 mmol) of EDCI (*N*-(3-dimethylaminopropyl)-*N'*-ethylcarbodiimide). After stirring 24 h at 23 °C, the reaction was quenched with 1 N HCl, extracted with ether, washed with brine, dried over  $\text{Na}_2\text{SO}_4$ , and concentrated. Purification by column chromatography (silica gel, 95/5 hexanes-EtOAc) afforded 384 mg (85%) of diene (**21**) as a colorless oil;  $[\alpha]_{\text{D}}^{23} = -18.4$  (*c*, 1.0,  $\text{CHCl}_3$ );  $^1\text{H NMR}$  (300 MHz,  $\text{CDCl}_3$ )  $\delta$  0.54 (d,  $J = 6.6$  Hz, 0.6 H), 0.68 (d,  $J = 6.6$  Hz, 2.4 H), 0.8-1.0 (m, 16 H), 1.1-1.65 (m, 9 H), 1.7-1.9 (m, 1 H), 2.0-2.2 (m, 1 H), 2.4-2.55 (m, 1 H), 2.72 (s, 2.4 H), 2.73 (s, 0.6 H), 2.8-3.0 (m, 1 H), 3.1-3.35 (m, 1 H), 3.5-3.6 (m, 2 H), 4.5-4.55 (m, 0.2 H), 4.7-4.95 (m, 5 H), 5.3-5.7 (m, 2.8 H), 7.0-7.2 (m, 5 H), 7.25-7.4 (m, 6 H), 7.58 (dd,  $J = 13.5, 4.5$  Hz, 4 H).

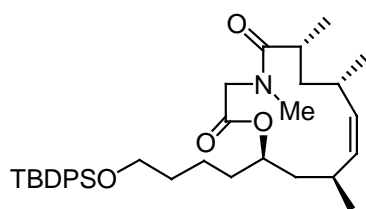

### Compound 22

To a solution of 200 mg (0.29 mmol) of **21** in 500 mL of dry  $\text{CH}_2\text{Cl}_2$  under argon was added 25 mg (0.028 mmol) of 2<sup>nd</sup> generation Grubbs catalyst. After stirring overnight at reflux, 13 mg (0.014 mmol) of 2<sup>nd</sup> generation Grubbs catalyst was added. After stirring further 8 h at reflux, the reaction mixture was concentrated and purified by column chromatography (silica gel, 90/10 hexanes-EtOAc) to afford 174 mg (92%) of **22** as a

colorless oil;  $[\alpha]_D^{23} = -89.2$  (*c*, 1.0, CHCl<sub>3</sub>);<sup>[h]</sup> <sup>1</sup>H NMR (300 MHz, CDCl<sub>3</sub>)  $\delta$  0.7-0.8 (m, 1 H), 1.00 (t, *J* = 6.3 Hz, 6 H), 1.06 (s, 9 H), 1.10 (d, *J* = 7.2 Hz, 3 H), 1.25-1.8 (m, 8 H), 1.90 (t, *J* = 12.6 Hz, 1 H), 2.05-2.2 (m, 1 H), 2.4-2.55 (m, 1 H), 2.61 (s, 3 H), 3.33 (dd, *J* = 12.3, 3.0 Hz, 1 H), 3.49 (t, *J* = 12.0 Hz, 1 H), 3.57 (dd, *J* = 10.8, 3.9 Hz, 1 H), 3.66 (t, *J* = 6.3 Hz, 1 H), 5.0-5.25 (m, 3 H), 7.1-7.3 (m, 5 H), 7.35-7.45 (m, 6 H), 7.6-7.7 (m, 4 H); <sup>13</sup>C NMR (75 MHz, CDCl<sub>3</sub>)  $\delta$  18.50, 19.11, 19.31, 19.84, 21.44, 26.78 (3 C), 30.09, 32.34, 33.57, 34.36, 35.06, 39.27, 43.00, 44.07, 63.41, 66.78, 73.07, 126.38, 127.50 (4 C), 128.29, 129.33, 129.44, 133.82, 135.39 (4 C), 135.53, 135.95, 138.54, 169.90, 176.44.

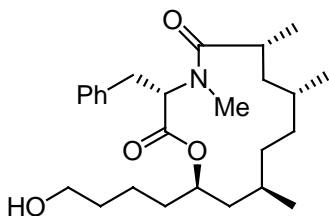

### Compound 23

To a solution of 170 mg (0.26 mmol) of **22** in 5 mL of THF was added 0.75 mL (0.75 mmol) of 1.0 M solution of TBAF in THF. After stirring for 3 h at 23 °C, the reaction mixture was quenched with saturated aqueous NH<sub>4</sub>Cl, extracted with ether, dried over MgSO<sub>4</sub>, and concentrated. Purification by column chromatography (silica gel, 70/30 hexanes-EtOAc) afforded 106 mg (95%) of the corresponding alcohol as a white solid.

To a solution of 105 mg (0.24 mmol) of the macrocyclic olefin prepared above and 80 mg (0.03 mmol) of 5% Pd/C in 8 mL of EtOAc was bubbled with H<sub>2</sub> overnight. The mixture was filtered on a plug of silica gel (5 cm), washed with EtOAc, and concentrated to give 99 mg (94%) of the title compound as a colorless oil;  $[\alpha]_D^{23} = -175.6$  (*c*, 1.0, CHCl<sub>3</sub>); <sup>1</sup>H NMR (300 MHz, CDCl<sub>3</sub>)  $\delta$  0.66 (ddd, *J* = 13.5, 11.1, 3.0 Hz, 1 H), 0.82 (d, *J* = 6.3 Hz, 6 H), 1.04 (d, *J* = 7.2 Hz, 3 H), 1.1-1.7 (m, 16 H), 1.91 (t, *J* = 12.6 Hz, 1 H), 2.57 (s, 3 H), 2.65-2.8 (m, 1 H), 3.22 (dd, *J* = 12.9, 3.6 Hz, 1 H), 3.42 (t, *J* = 13.5 Hz, 1 H), 3.51 (dd, *J* = 11.4, 7.2 Hz, 1 H), 3.58 (t, *J* = 6.9 Hz, 2 H), 5.05-5.1 (m, 1 H), 7.05-7.25 (m, 5 H); <sup>13</sup>C NMR (75 MHz, CDCl<sub>3</sub>)  $\delta$  18.72, 21.33, 21.64, 22.23, 24.00, 27.20, 31.38, 32.25, 32.53,

33.26, 34.33, 35.54, 36.94, 39.10, 39.58, 62.60, 66.84, 73.15, 126.41, 128.35 (2 C), 129.39 (2 C), 138.68, 170.15, 176.80; MS (EI): 432 (4.3), 431 (9.2), 296 (6.7), 284 (7.4), 134 (55); HRMS calcd. for C<sub>26</sub>H<sub>41</sub>NO<sub>4</sub> [M]<sup>+</sup>: 431.3036, 431.3001.

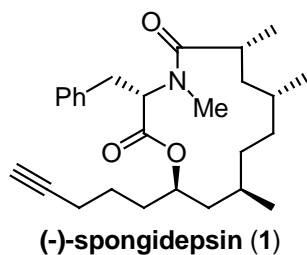

To a solution of 45.1 mg (0.1 mmol) of **23** in 3 mL of CH<sub>2</sub>Cl<sub>2</sub> was added 85 mg (0.2 mmol) of Dess-Martin periodinane at 0 °C. After stirring for 1 h at 23 °C, the reaction mixture was quenched with 0.3 mL of saturated aqueous Na<sub>2</sub>SO<sub>3</sub> and 0.3 mL of saturated aqueous NaHCO<sub>3</sub>. After stirring for 30 min at 23 °C, the resultant mixture was filtered on a plug of silica gel (5 cm), washed with ether, and concentrated to give the crude aldehyde, which was directly used in the next step.

To a solution of the aldehyde prepared above and 110 mg (0.5 mmol) of Ohira-Bestmann's reagent<sup>[j]</sup> in 10 mL of MeOH was added 56 mg (0.45 mmol) of K<sub>2</sub>CO<sub>3</sub> under argon. After stirring for 2 h at 35 °C, the reaction mixture was quenched with saturated aqueous NH<sub>4</sub>Cl, extracted with ether, dried over MgSO<sub>4</sub>, and concentrated. Purification by column chromatography (silica gel, 95/5 hexanes-EtOAc) gave 35.2 mg (79%, 2 steps) of (-)-spongidepsin (**1**) as a crystalline solid; [α]<sub>D</sub><sup>23</sup> = -211.8 (c, 1.0, CH<sub>3</sub>OH); [α]<sub>D</sub><sup>23</sup> = -203.2 (c, 0.4, CH<sub>3</sub>OH)<sup>[h]</sup>; <sup>1</sup>H NMR (300 MHz, CDCl<sub>3</sub>) δ 0.7-0.85 (ddd, *J* = 13.5, 11.2, 3.0 Hz, 1 H), 0.89 (d, *J* = 6.0 Hz, 3 H), 0.92 (d, *J* = 6.3 Hz, 3 H), 1.07 (d, *J* = 6.9 Hz, 3 H), 1.2-1.8 (m, 10 H), 1.91 (t, *J* = 12.6 Hz, 1 H), 2.2-2.3 (m, 3 H), 2.71 (s, 3 H), 2.85-3.0 (m, 1 H), 3.24 (dd, *J* = 14.1, 5.1 Hz, 1 H), 3.40 (dd, *J* = 14.1, 11.1 Hz, 1 H), 3.98 (dd, *J* = 11.1, 4.5 Hz, 1 H), 5.1-5.25 (m, 1 H), 7.15-7.35 (m, 5 H); <sup>13</sup>C NMR (75 MHz, CD<sub>3</sub>OD) δ 18.93 (2 C), 21.63, 22.47, 25.19, 25.47, 28.31, 32.49, 33.36, 34.46, 35.27, 35.75, 37.97, 40.30, 40.38, 67.56, 69.97, 73.90, 84.63, 127.66, 129.49 (2 C),

130.55 (2 C), 139.51, 171.82, 179.35; MS (CI): 427 (23), 426 (79), 275 (11), 180 (100); HRMS calcd. for C<sub>27</sub>H<sub>39</sub>NO<sub>3</sub> [M+H]<sup>+</sup>: 426.3003, found: 426.3009.

### References:

- [a] Erker, G.; Aulbach, M.; Knickmeier, M.; Wingbermuehle, D.; Kruger, C.; Nolte, M.; Werner, S. *J. Am. Chem. Soc.* **1993**, *115*, 4590.
- [b] Kranenburg, M.; van der Burgt, Y. E. M.; Kamer, P. C. J.; van Leeuwen, P. W. N. M.; Goubitz, K.; Fraanje, J. *Organometallics* **1995**, *14*, 3081.
- [c] Chamberland, S.; Woerpel, K. A. *Org. Lett.* **2004**, 4739.
- [d] Omura, K.; Swern, D. *Tetrahedron* **1978**, *34*, 1651.
- [e] Brown, H. C.; Jadhav, P. K. *J. Am. Chem. Soc.* **1983**, *105*, 2092.
- [f] Wipf, P. Ribe, S. *Org. Lett.* **2000**, *2*, 1713-1716.
- [g] (1) Tan, Z.; Negishi, E. *Angew. Chem. Int. Ed.* **2004**, *43*, 2911. (2) Liang, B.; Novak, T.; Tan, Z.; Negishi, E. *J. Am. Chem. Soc.* **2006**, *128*, 2770.
- [h] (1) Chen, J.; Forsyth, C. J. *Angew. Chem. Int. Ed.* **2004**, *43*, 2148–2152. (2) Ghosh, A. K.; Xu, X. *Org. Lett.* **2004**, *6*, 2055. (3) Ferrié, L.; Reymond, S.; Capdevielle, P.; Cossy, J. *Org. Lett.* **2006**, *8*, 3441.
- [i] Guintchin, B.; Bienz, S. *Tetrahedron* **2003**, *59*, 7527.
- [j] Müller, S.; Liepold, B.; Roth, G. J.; Bestmann, H. J. *Synlett* **1996**, 521.



| INDEX | FREQUENCY | PPM   | HEIGHT |
|-------|-----------|-------|--------|
| 1     | 2332.445  | 7.776 | 47.0   |
| 2     | 2330.587  | 7.770 | 54.8   |
| 3     | 2328.930  | 7.764 | 31.0   |
| 4     | 2325.415  | 7.752 | 46.4   |
| 5     | 2323.071  | 7.745 | 48.3   |
| 6     | 2244.567  | 7.483 | 23.7   |
| 7     | 2239.294  | 7.463 | 30.6   |
| 8     | 2232.850  | 7.444 | 48.3   |
| 9     | 2226.405  | 7.422 | 18.2   |
| 10    | 1135.199  | 3.778 | 22.7   |
| 11    | 1128.754  | 3.756 | 45.3   |
| 12    | 1120.310  | 3.735 | 23.7   |
| 13    | 1102.148  | 3.674 | 17.5   |
| 14    | 1095.704  | 3.653 | 32.7   |
| 15    | 1089.260  | 3.631 | 18.6   |
| 16    | 501.061   | 1.670 | 20.5   |
| 17    | 494.030   | 1.647 | 19.7   |
| 18    | 488.758   | 1.629 | 17.0   |
| 19    | 482.313   | 1.608 | 19.1   |
| 20    | 475.283   | 1.584 | 19.2   |
| 21    | 453.606   | 1.512 | 17.2   |
| 22    | 447.162   | 1.491 | 16.4   |
| 23    | 350.496   | 1.168 | 39.7   |
| 24    | 342.880   | 1.143 | 38.6   |
| 25    | 334.092   | 1.114 | 18.7   |

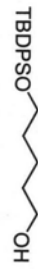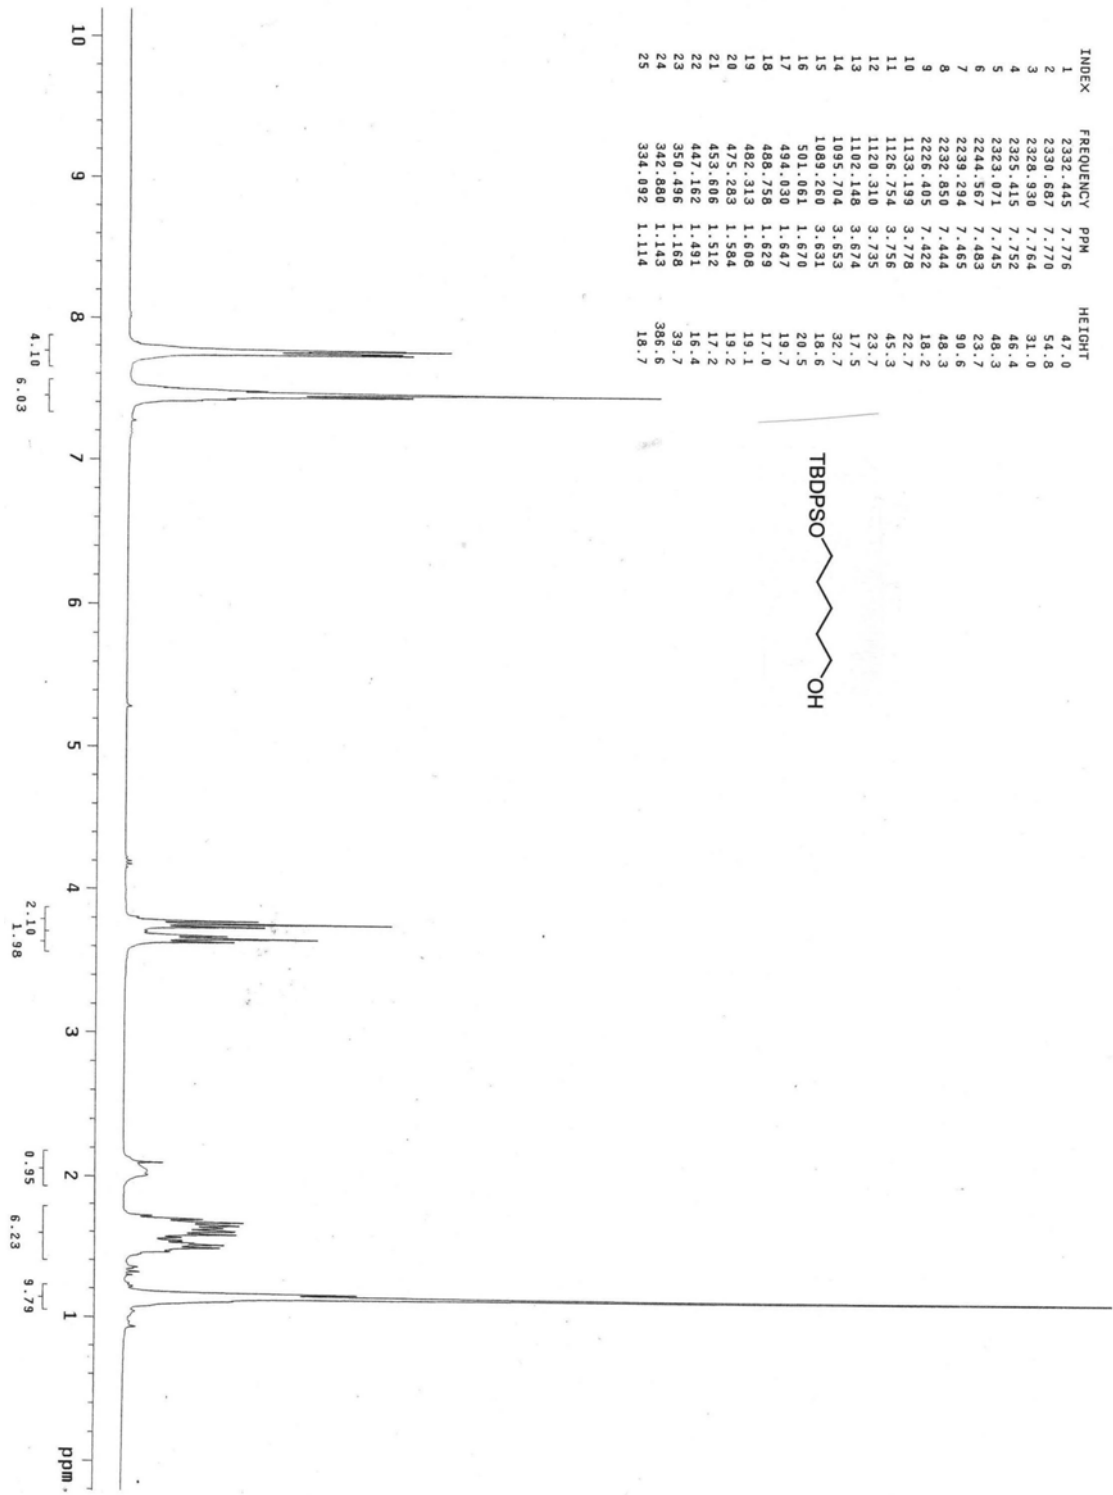

| INDEX | FREQUENCY | PPM     | HEIGHT |
|-------|-----------|---------|--------|
| 1     | 10216.230 | 135.449 | 85.2   |
| 2     | 10099.771 | 133.905 | 13.8   |
| 3     | 9763.099  | 129.441 | 44.0   |
| 4     | 9616.995  | 127.504 | 87.2   |
| 5     | 5839.486  | 77.421  | 6.9    |
| 6     | 5807.724  | 77.000  | 6.3    |
| 7     | 5773.845  | 76.551  | 6.3    |
| 8     | 4804.058  | 63.693  | 19.2   |
| 9     | 4723.598  | 62.626  | 17.2   |
| 10    | 2434.645  | 32.279  | 22.3   |
| 11    | 2426.175  | 32.167  | 22.6   |
| 12    | 2019.627  | 28.777  | 66.3   |
| 13    | 1649.076  | 21.864  | 19.5   |
| 14    | 1441.567  | 19.113  | 11.0   |

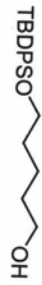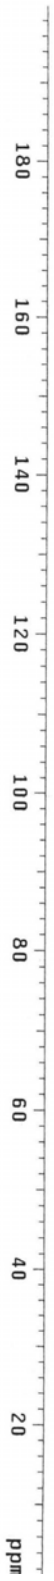

| INDEX | FREQUENCY | PPM   | HEIGHT |
|-------|-----------|-------|--------|
| 1     | 2363.249  | 7.879 | 20.9   |
| 2     | 2361.492  | 7.873 | 29.6   |
| 3     | 2359.148  | 7.865 | 21.8   |
| 4     | 2356.805  | 7.857 | 30.3   |
| 5     | 2354.462  | 7.849 | 35.8   |
| 6     | 2284.828  | 7.550 | 58.6   |
| 7     | 2258.967  | 7.531 | 34.6   |
| 8     | 1162.246  | 3.875 | 21.1   |
| 9     | 1135.882  | 3.787 | 21.0   |
| 10    | 550.027   | 1.834 | 24.6   |
| 11    | 547.097   | 1.824 | 27.7   |
| 12    | 544.168   | 1.814 | 27.9   |
| 13    | 373.884   | 1.246 | 227.4  |

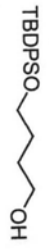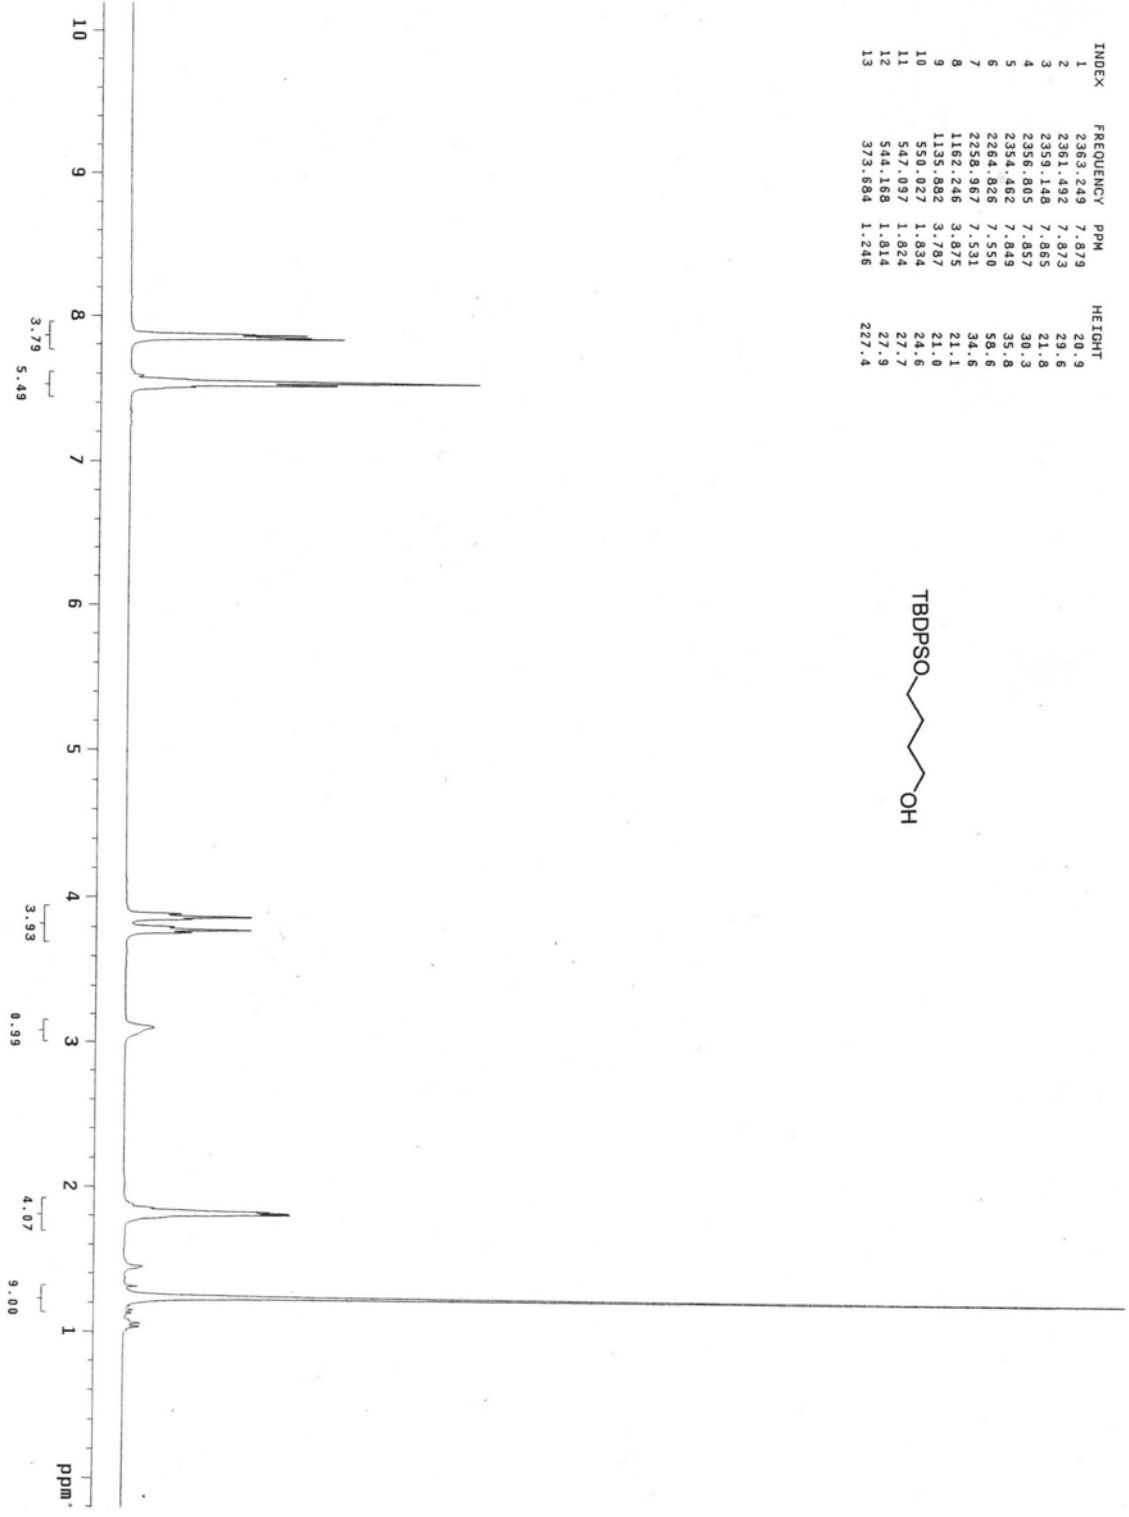

| INDEX | FREQUENCY | PPM     | HEIGHT |
|-------|-----------|---------|--------|
| 1     | 10214.113 | 135.421 | 73.2   |
| 2     | 10072.245 | 133.540 | 14.2   |
| 3     | 9769.451  | 129.525 | 37.5   |
| 4     | 9619.113  | 127.532 | 64.3   |
| 5     | 5841.603  | 77.449  | 4.4    |
| 6     | 5607.724  | 77.000  | 4.2    |
| 7     | 5775.963  | 76.579  | 4.5    |
| 8     | 4816.763  | 63.862  | 19.9   |
| 9     | 4704.539  | 62.374  | 20.5   |
| 10    | 2222.902  | 29.472  | 18.0   |
| 11    | 2195.375  | 29.107  | 18.6   |
| 12    | 2015.393  | 26.720  | 61.3   |
| 13    | 1435.215  | 19.028  | 12.2   |

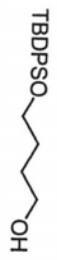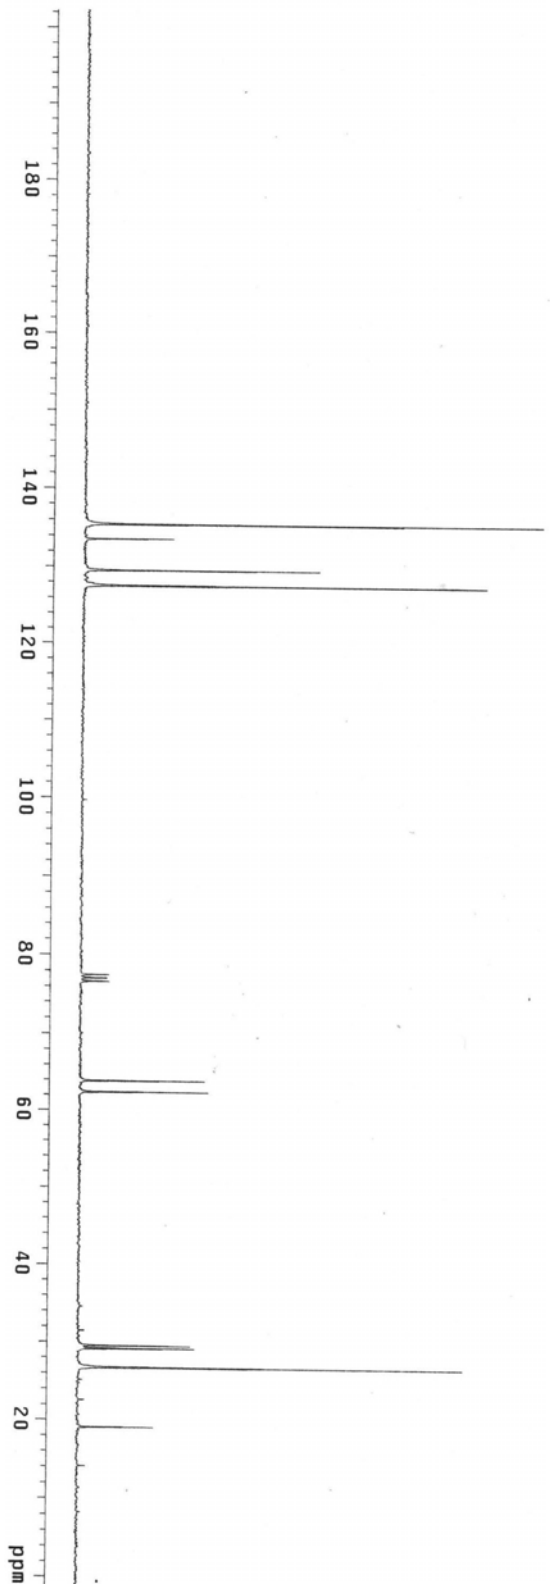

| INDEX | FREQUENCY | PPM   | HEIGHT |
|-------|-----------|-------|--------|
| 1     | 2952.034  | 9.841 | 12.7   |
| 2     | 2366.764  | 7.890 | 35.7   |
| 3     | 2364.421  | 7.882 | 35.8   |
| 4     | 2362.078  | 7.875 | 35.8   |
| 5     | 2359.734  | 7.867 | 36.4   |
| 6     | 2267.755  | 7.560 | 71.1   |
| 7     | 2266.563  | 7.556 | 71.5   |
| 8     | 2261.896  | 7.541 | 43.9   |
| 9     | 2256.038  | 7.521 | 17.7   |
| 10    | 2253.694  | 7.513 | 11.0   |
| 11    | 1167.518  | 3.882 | 15.4   |
| 12    | 1161.074  | 3.871 | 28.5   |
| 13    | 1153.215  | 3.851 | 14.8   |
| 14    | 762.106   | 2.541 | 9.8    |
| 15    | 755.682   | 2.519 | 19.9   |
| 16    | 748.632   | 2.496 | 11.3   |
| 17    | 576.976   | 1.924 | 11.2   |
| 18    | 569.946   | 1.900 | 15.6   |
| 19    | 561.744   | 1.873 | 14.2   |
| 20    | 538.209   | 1.781 | 13.3   |
| 21    | 528.936   | 1.763 | 13.6   |
| 22    | 526.007   | 1.754 | 14.7   |
| 23    | 520.148   | 1.734 | 10.5   |
| 24    | 381.886   | 1.273 | 200.0  |

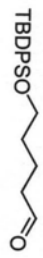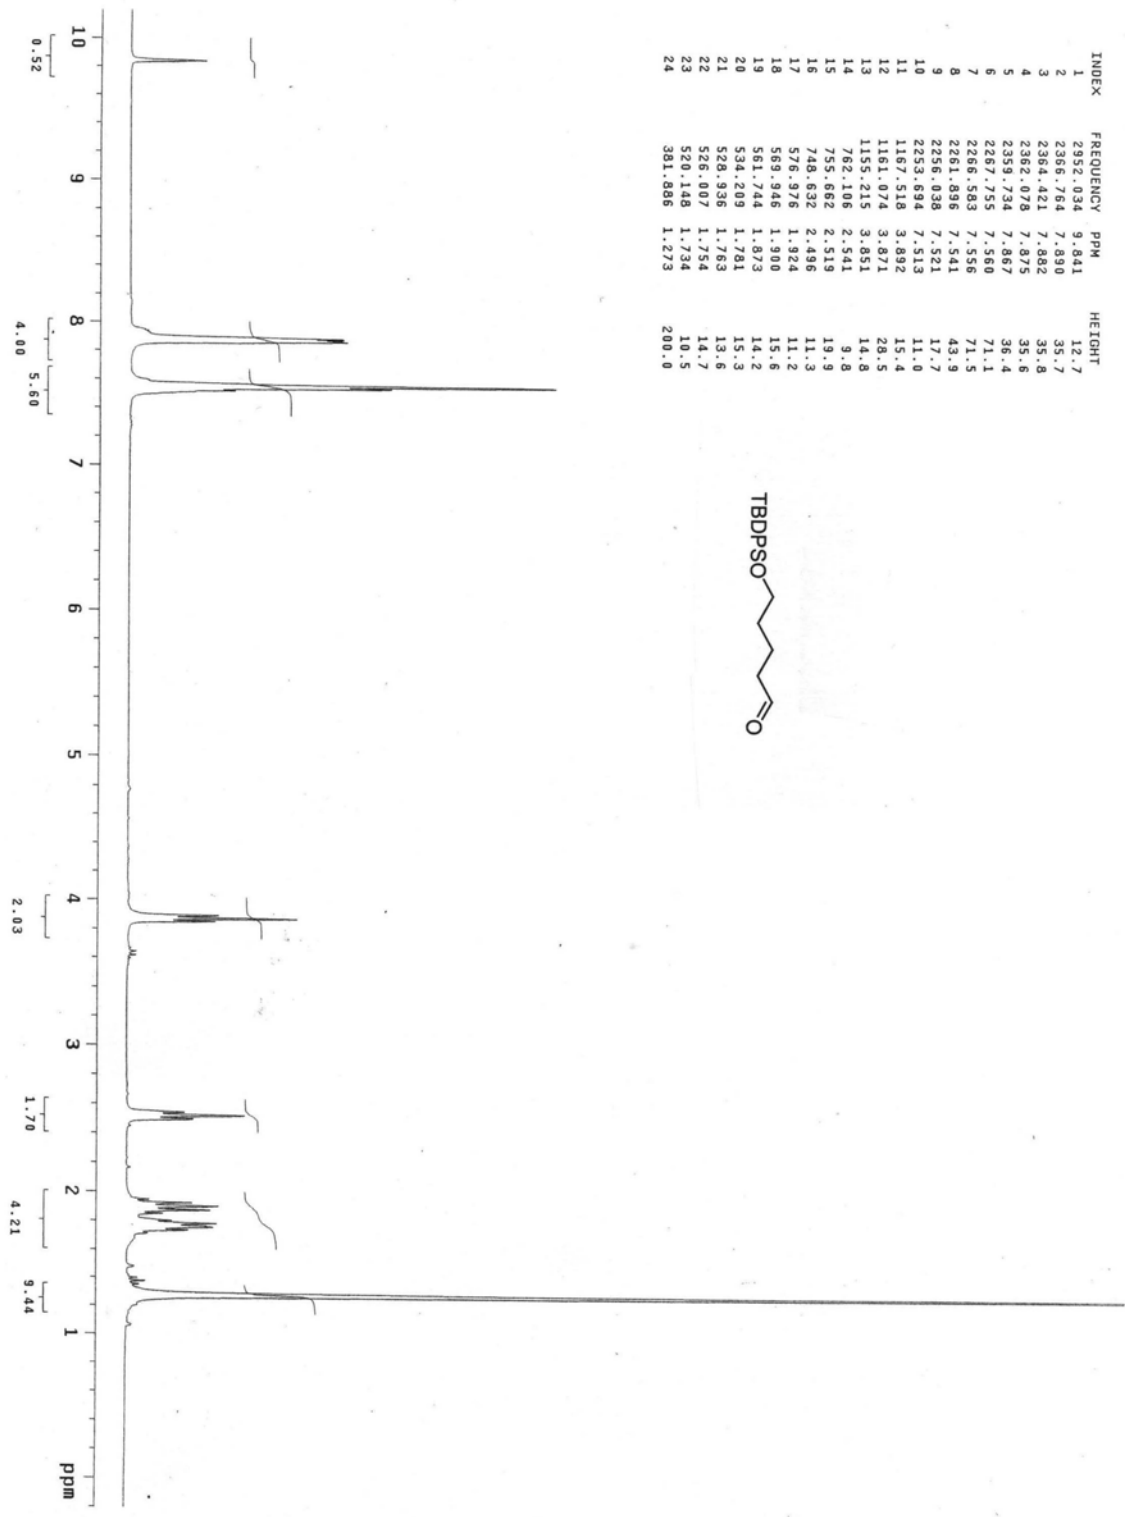

| INDEX | FREQUENCY | PPM     | HEIGHT |
|-------|-----------|---------|--------|
| 1     | 15243.030 | 202.095 | 6.2    |
| 2     | 10205.644 | 135.309 | 86.5   |
| 3     | 10074.363 | 133.588 | 12.2   |
| 4     | 9760.982  | 129.413 | 38.8   |
| 5     | 9612.762  | 127.448 | 66.1   |
| 6     | 4755.358  | 63.048  | 19.0   |
| 7     | 3256.212  | 43.172  | 17.6   |
| 8     | 2381.710  | 31.577  | 16.9   |
| 9     | 2011.158  | 28.864  | 55.4   |
| 10    | 1430.980  | 18.972  | 13.2   |
| 11    | 1380.162  | 18.298  | 15.2   |

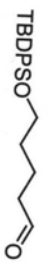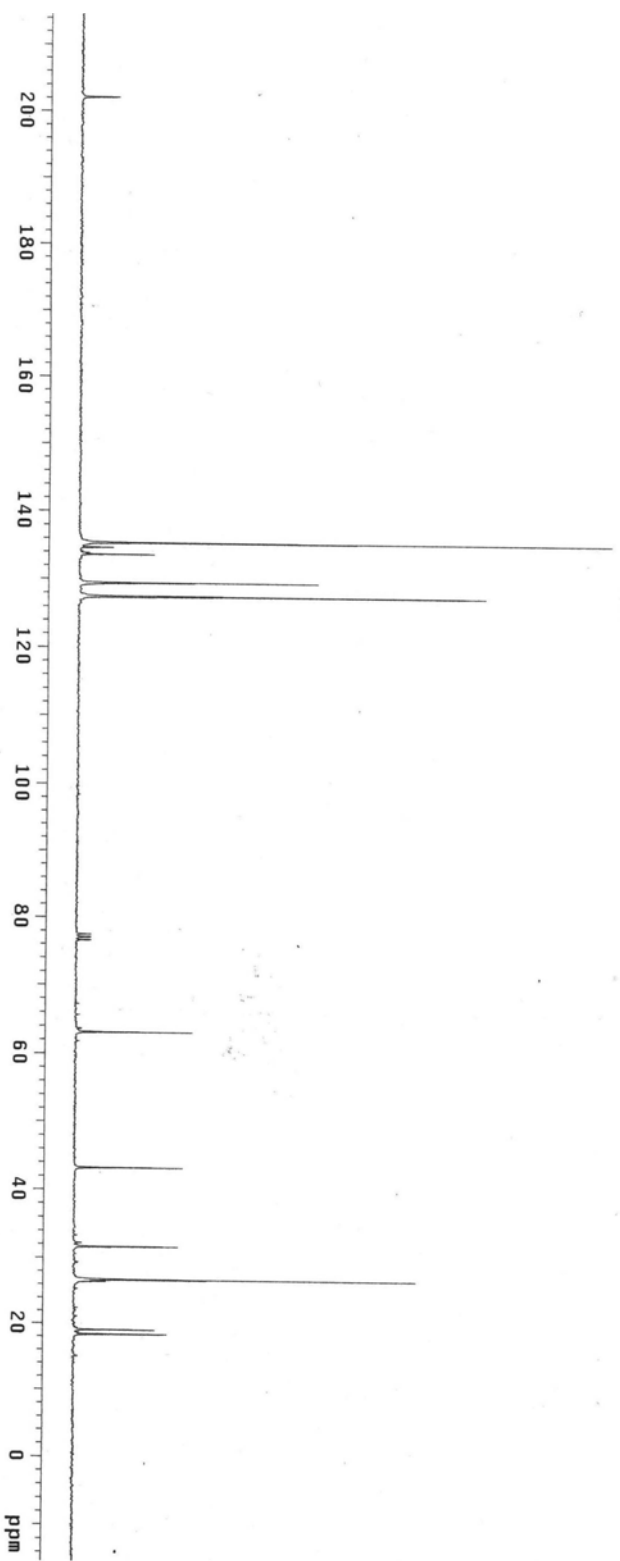

| INDEX | FREQUENCY | PPM   | HEIGHT |
|-------|-----------|-------|--------|
| 1     | 2942.695  | 9.810 | 10.0   |
| 2     | 2941.524  | 9.806 | 21.6   |
| 3     | 2939.766  | 9.801 | 13.3   |
| 4     | 2315.830  | 7.720 | 27.9   |
| 5     | 2309.972  | 7.701 | 28.4   |
| 6     | 2307.628  | 7.683 | 31.5   |
| 7     | 2297.323  | 7.459 | 11.0   |
| 8     | 2296.134  | 7.455 | 14.5   |
| 9     | 2292.639  | 7.443 | 29.1   |
| 10    | 2290.881  | 7.437 | 78.6   |
| 11    | 2223.851  | 7.414 | 35.9   |
| 12    | 2221.507  | 7.406 | 10.2   |
| 13    | 2217.992  | 7.394 | 10.5   |
| 14    | 1127.129  | 3.758 | 17.9   |
| 15    | 1121.271  | 3.738 | 34.6   |
| 16    | 1114.828  | 3.717 | 17.7   |
| 17    | 779.717   | 2.599 | 11.5   |
| 18    | 777.959   | 2.594 | 12.5   |
| 19    | 772.687   | 2.576 | 21.9   |
| 20    | 770.929   | 2.570 | 25.6   |
| 21    | 765.071   | 2.551 | 12.8   |
| 22    | 763.839   | 2.547 | 12.8   |
| 23    | 584.627   | 1.949 | 14.0   |
| 24    | 577.597   | 1.926 | 23.2   |
| 25    | 571.738   | 1.906 | 12.7   |
| 26    | 392.123   | 1.107 | 237.9  |

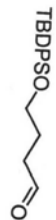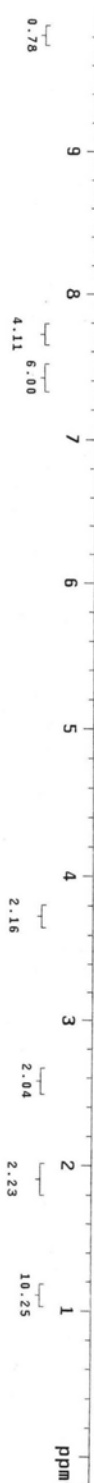

| INDEX | FREQUENCY PPM | HEIGHT  |
|-------|---------------|---------|
| 1     | 15251.499     | 202.209 |
| 2     | 10214.113     | 135.421 |
| 3     | 10065.892     | 133.456 |
| 4     | 9773.686      | 129.582 |
| 5     | 9523.348      | 127.588 |
| 6     | 5839.486      | 77.421  |
| 7     | 5807.724      | 77.000  |
| 8     | 5775.963      | 76.579  |
| 9     | 4736.300      | 62.795  |
| 10    | 3063.524      | 40.617  |
| 11    | 2015.392      | 26.720  |
| 12    | 1894.698      | 25.120  |
| 13    | 1437.392      | 19.058  |

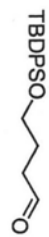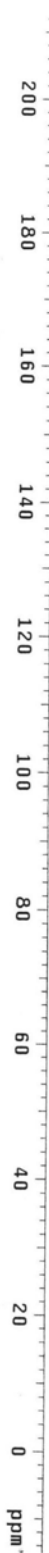



| INDEX | FREQUENCY | PPM   | HEIGHT |
|-------|-----------|-------|--------|
| 1     | 2317.799  | 7.727 | 26.4   |
| 2     | 2316.041  | 7.721 | 24.2   |
| 3     | 2314.869  | 7.717 | 17.9   |
| 4     | 2312.526  | 7.709 | 24.1   |
| 5     | 2310.182  | 7.702 | 26.6   |
| 6     | 2236.951  | 7.457 | 12.0   |
| 7     | 2230.506  | 7.436 | 46.3   |
| 8     | 2223.476  | 7.413 | 25.9   |
| 9     | 1989.580  | 5.239 | 10.3   |
| 10    | 1956.186  | 5.188 | 10.5   |
| 11    | 1555.015  | 5.184 | 12.0   |
| 12    | 1543.298  | 5.145 | 12.3   |
| 13    | 1542.126  | 5.141 | 13.1   |
| 14    | 1120.310  | 3.735 | 9.4    |
| 15    | 1115.623  | 3.719 | 16.2   |
| 16    | 1113.866  | 3.713 | 16.8   |
| 17    | 1109.179  | 3.698 | 9.5    |
| 18    | 1108.007  | 3.694 | 9.7    |
| 19    | 486.172   | 1.627 | 8.3    |
| 20    | 454.192   | 1.514 | 9.5    |
| 21    | 448.334   | 1.495 | 15.1   |
| 22    | 446.576   | 1.489 | 14.2   |
| 23    | 444.819   | 1.483 | 13.9   |
| 24    | 329.405   | 1.098 | 133.3  |
| 25    | 327.648   | 1.092 | 185.4  |

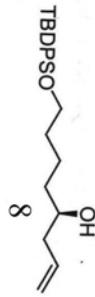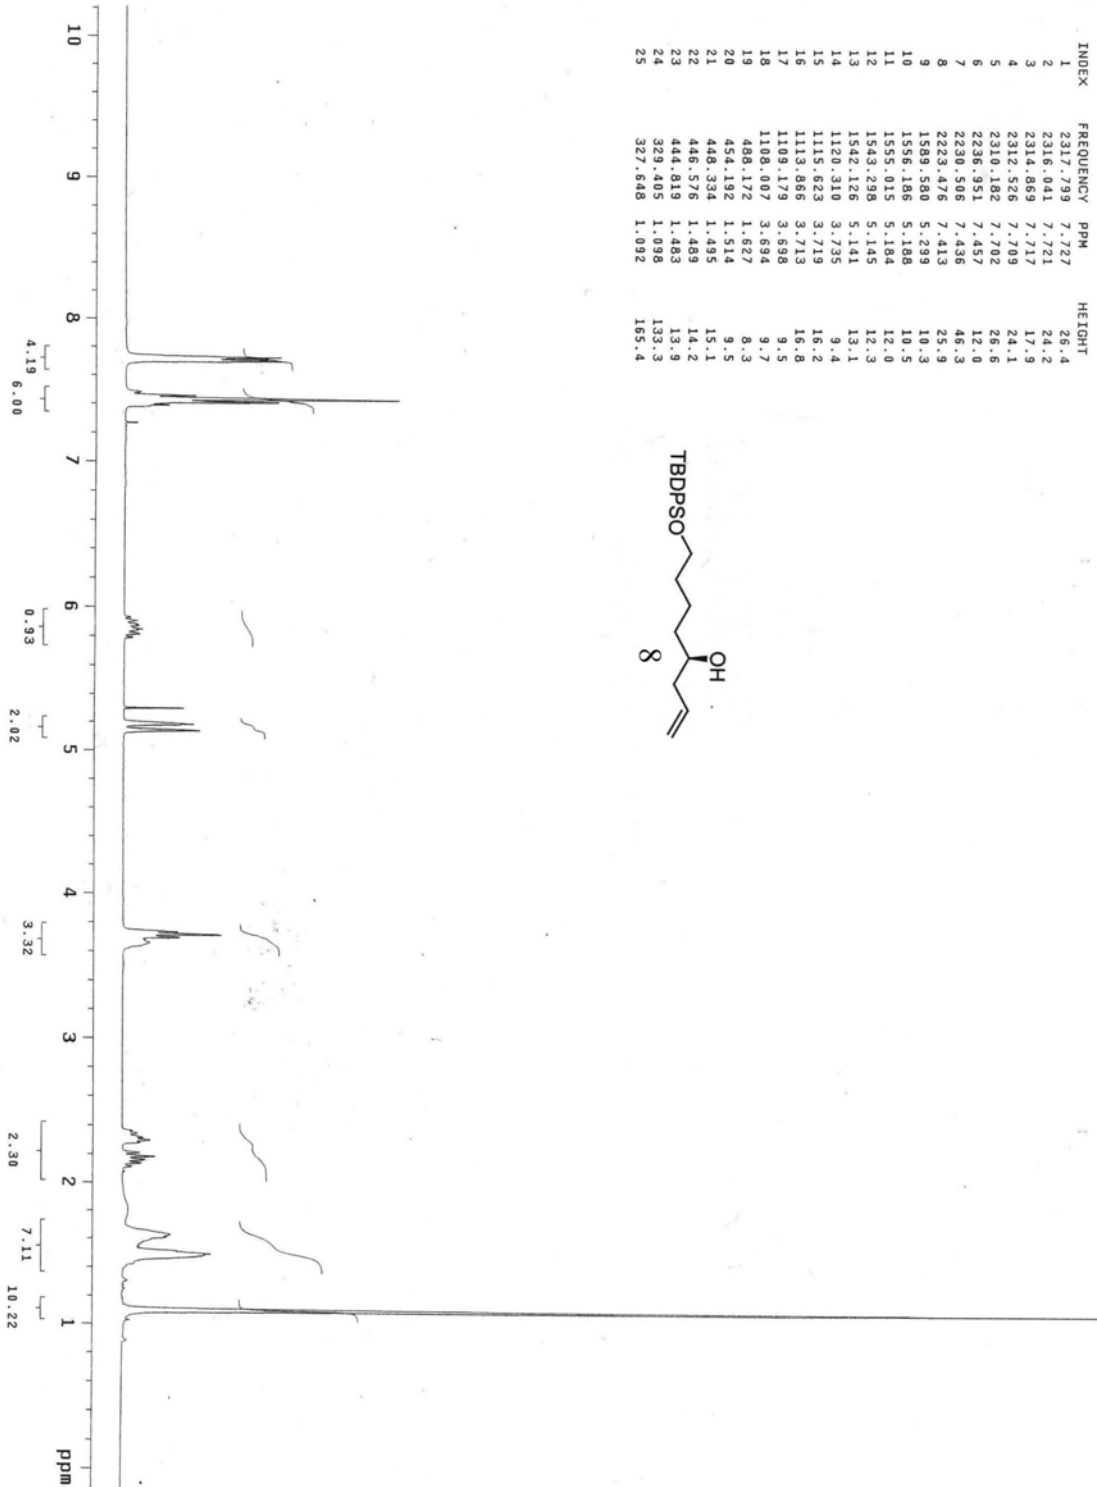

| INDEX | FREQUENCY | PPM     | HEIGHT |
|-------|-----------|---------|--------|
| 1     | 10222.582 | 135.533 | 70.8   |
| 2     | 10169.646 | 134.831 | 15.3   |
| 3     | 10108.240 | 134.017 | 11.3   |
| 4     | 9767.333  | 129.437 | 35.1   |
| 5     | 9621.230  | 127.560 | 63.3   |
| 6     | 8901.301  | 118.015 | 17.7   |
| 7     | 5839.485  | 77.421  | 9.8    |
| 8     | 5807.723  | 77.000  | 10.6   |
| 9     | 5775.962  | 76.579  | 11.5   |
| 10    | 5320.713  | 70.543  | 16.4   |
| 11    | 4808.293  | 63.749  | 16.0   |
| 12    | 3156.691  | 41.852  | 17.3   |
| 13    | 2748.025  | 36.434  | 14.6   |
| 14    | 2447.349  | 32.447  | 15.1   |
| 15    | 2023.861  | 26.833  | 48.8   |
| 16    | 1649.075  | 21.864  | 16.6   |
| 17    | 1445.801  | 19.169  | 10.6   |

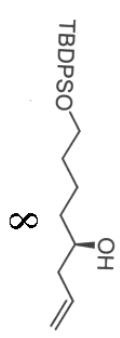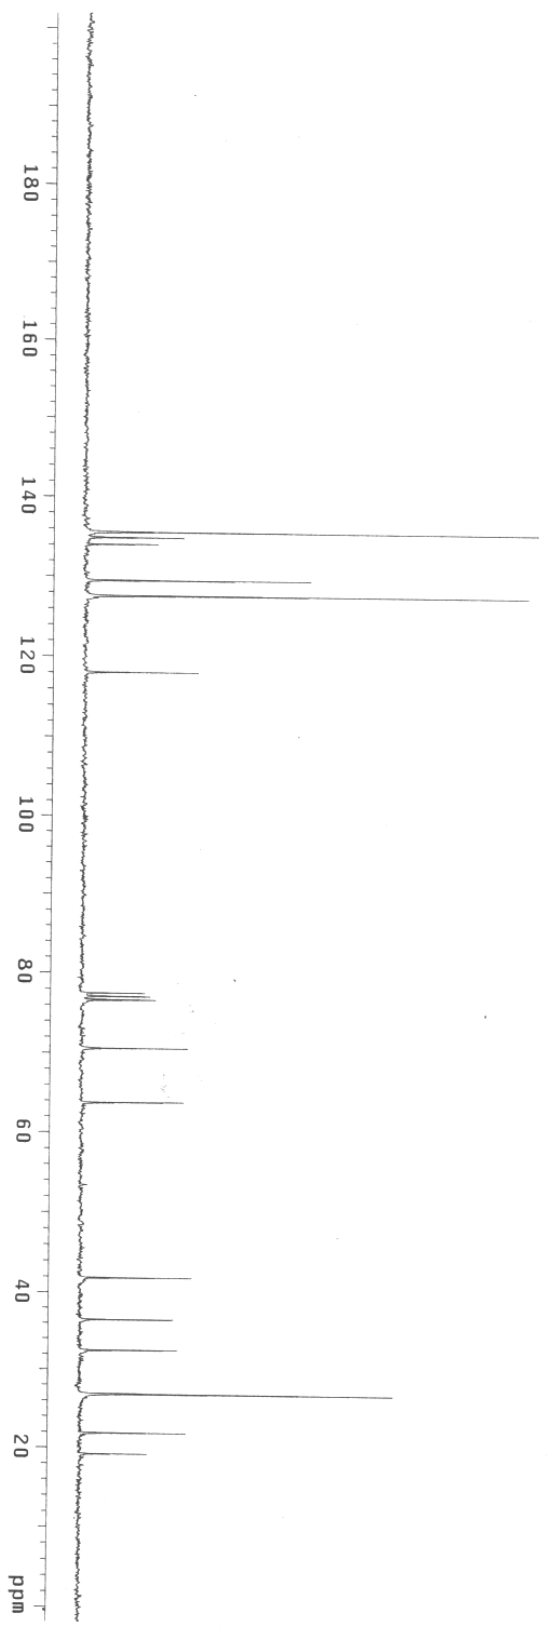

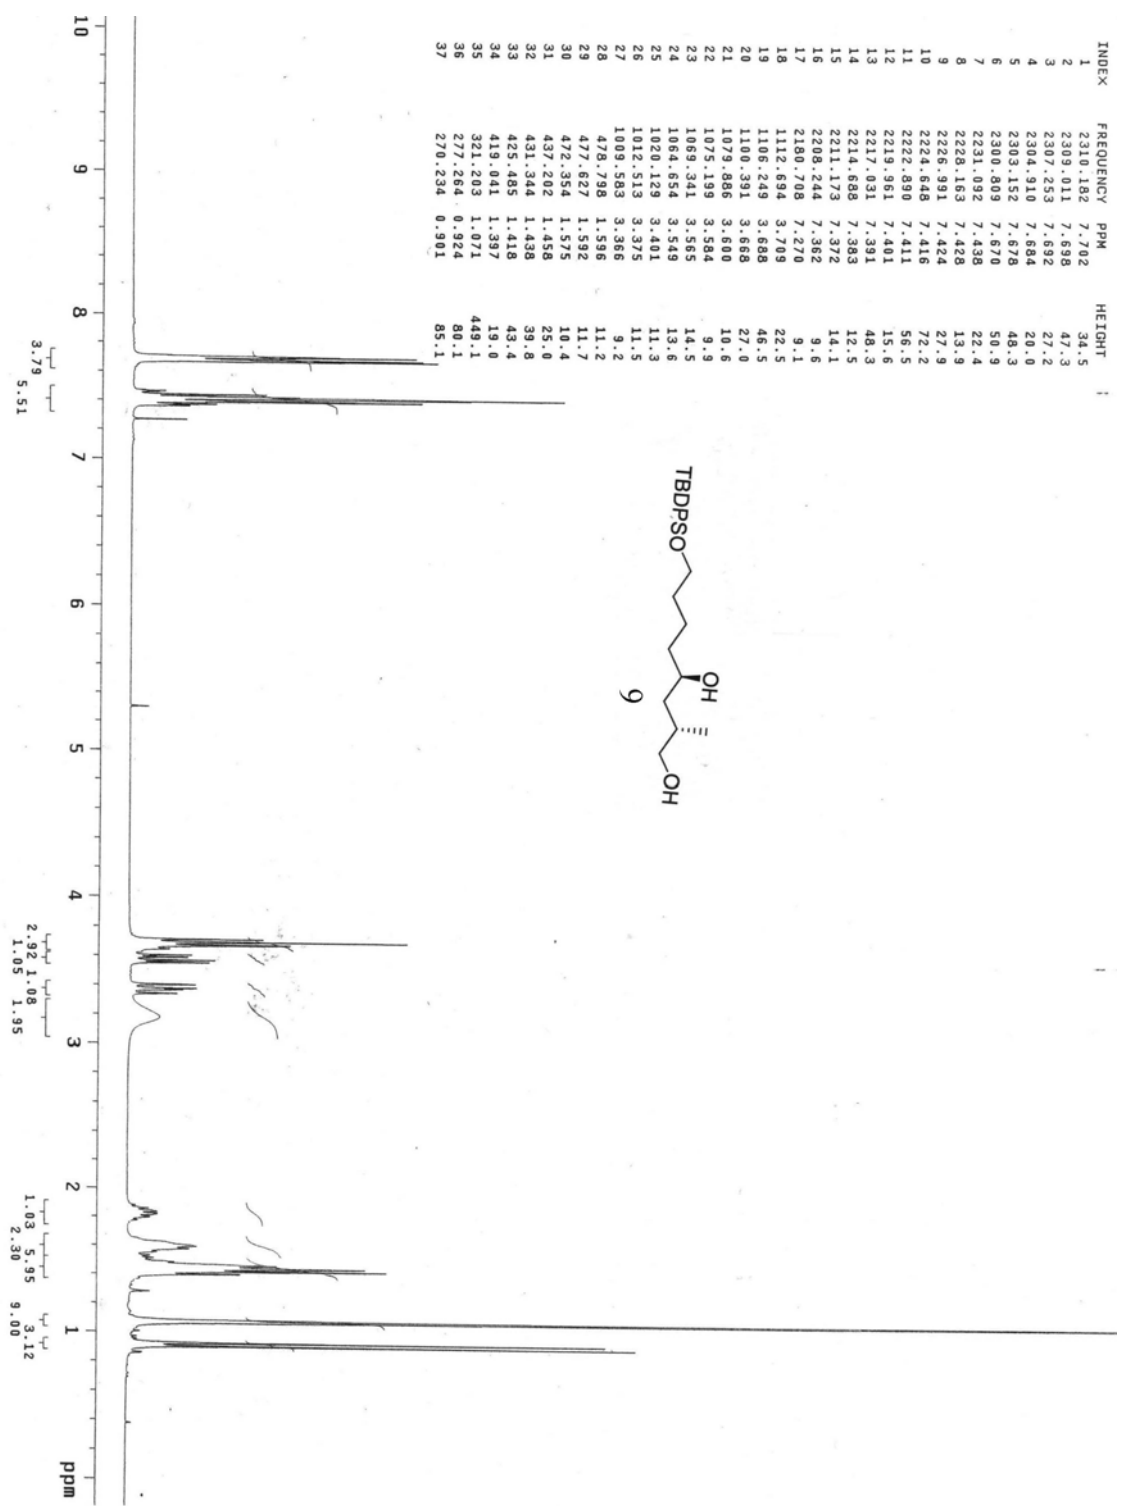





| INDEX | FREQUENCY | PPM     | HEIGHT |
|-------|-----------|---------|--------|
| 1     | 13510.966 | 179.131 | 4.4    |
| 2     | 10188.706 | 135.084 | 55.2   |
| 3     | 10065.894 | 135.458 | 9.5    |
| 4     | 9739.809  | 129.132 | 36.8   |
| 5     | 9591.588  | 127.167 | 59.3   |
| 6     | 5894.541  | 78.151  | 13.7   |
| 7     | 5839.488  | 77.421  | 90.1   |
| 8     | 5807.728  | 77.000  | 91.9   |
| 9     | 5775.964  | 76.579  | 90.5   |
| 10    | 4755.359  | 63.048  | 16.5   |
| 11    | 2781.907  | 36.883  | 16.2   |
| 12    | 2673.917  | 35.451  | 13.8   |
| 13    | 2620.981  | 34.749  | 17.4   |
| 14    | 2390.181  | 31.689  | 17.4   |
| 15    | 1992.102  | 26.412  | 53.1   |
| 16    | 1600.376  | 21.218  | 16.0   |
| 17    | 1414.042  | 18.748  | 10.6   |
| 18    | 1107.013  | 14.677  | 13.2   |

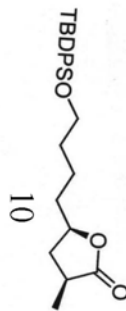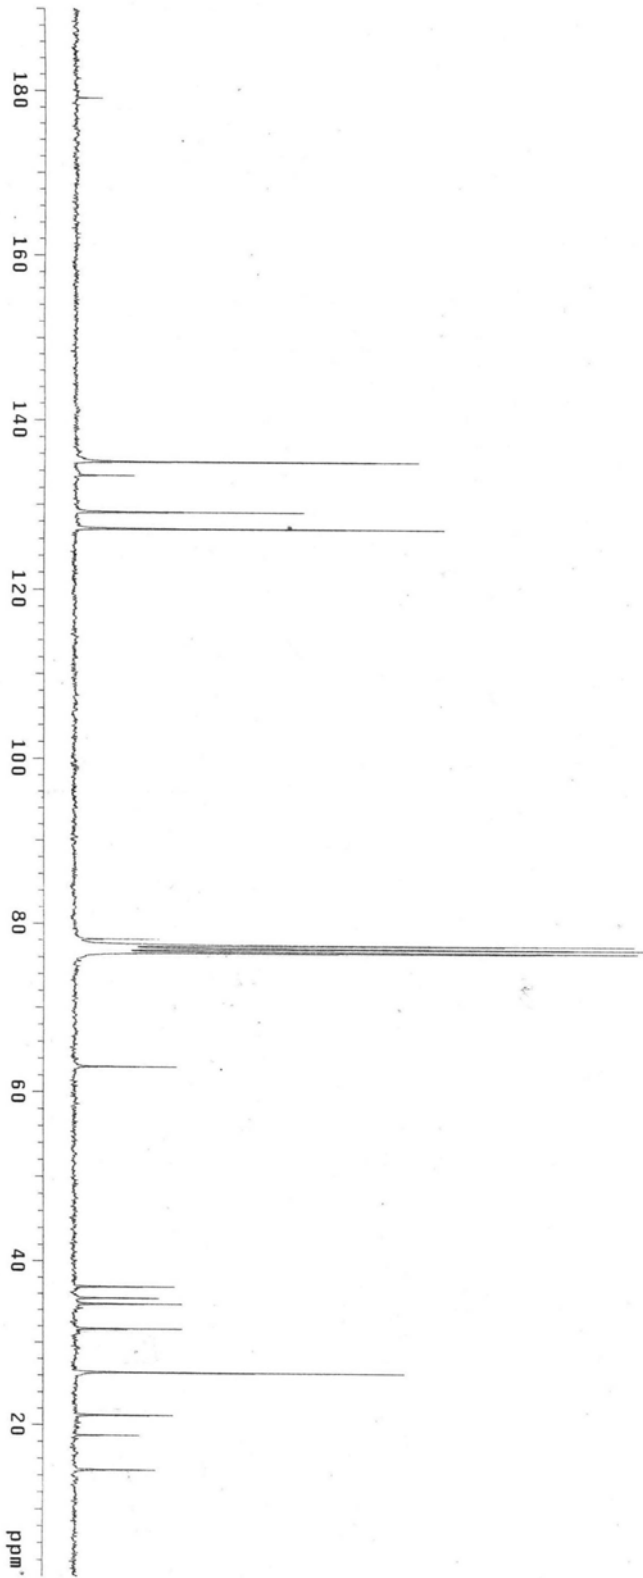

| INDEX | FREQUENCY PPM | HEIGHT |
|-------|---------------|--------|
| 1     | 1700.738      | 5.670  |
| 2     | 1692.536      | 5.643  |
| 3     | 1690.779      | 5.637  |
| 4     | 1682.577      | 5.609  |
| 5     | 1675.547      | 5.586  |
| 6     | 1673.789      | 5.560  |
| 7     | 1665.587      | 5.553  |
| 8     | 1496.861      | 4.990  |
| 9     | 1479.285      | 4.932  |
| 10    | 1476.942      | 4.924  |
| 11    | 1474.598      | 4.916  |
| 12    | 1466.396      | 4.889  |
| 13    | 1464.639      | 4.883  |
| 14    | 1033.449      | 3.445  |
| 15    | 1027.591      | 3.426  |
| 16    | 1022.904      | 3.410  |
| 17    | 1017.045      | 3.391  |
| 18    | 1009.429      | 3.385  |
| 19    | 1002.985      | 3.344  |
| 20    | 998.884       | 3.330  |
| 21    | 992.439       | 3.309  |
| 22    | 877.249       | 2.298  |
| 23    | 670.219       | 2.234  |
| 24    | 663.774       | 2.213  |
| 25    | 502.078       | 1.674  |
| 26    | 495.634       | 1.652  |
| 27    | 492.119       | 1.641  |
| 28    | 488.663       | 1.629  |
| 29    | 486.260       | 1.621  |
| 30    | 482.139       | 1.607  |
| 31    | 425.391       | 1.418  |
| 32    | 420.644       | 1.402  |
| 33    | 415.372       | 1.385  |
| 34    | 411.271       | 1.371  |
| 35    | 407.170       | 1.357  |
| 36    | 401.897       | 1.340  |
| 37    | 397.210       | 1.324  |
| 38    | 322.221       | 1.074  |
| 39    | 319.877       | 1.066  |

| INDEX | FREQUENCY PPM | HEIGHT |
|-------|---------------|--------|
| 40    | 316.948       | 1.057  |
| 41    | 315.190       | 1.051  |
| 42    | 312.261       | 1.041  |
| 43    | 308.180       | 1.027  |
| 44    | 302.301       | 1.008  |
| 45    | 295.271       | 0.984  |
| 46    | 288.908       | 0.896  |
| 47    | 281.877       | 0.873  |

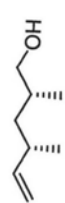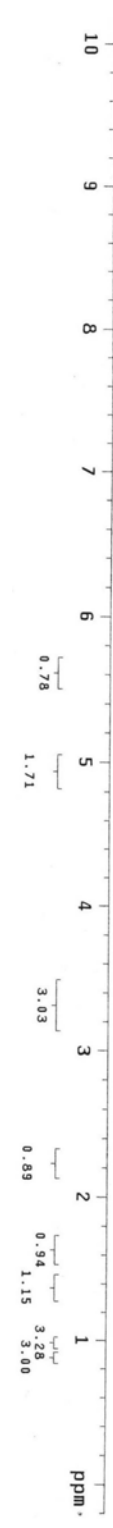

| INDEX | FREQUENCY | PPM     | HEIGHT |
|-------|-----------|---------|--------|
| 1     | 10876.871 | 144.208 | 73.9   |
| 2     | 8496.870  | 112.853 | 56.0   |
| 3     | 5136.496  | 68.101  | 74.8   |
| 4     | 3031.762  | 40.196  | 90.5   |
| 5     | 2665.445  | 35.339  | 80.5   |
| 6     | 2500.285  | 33.149  | 81.0   |
| 7     | 1606.726  | 21.302  | 74.2   |
| 8     | 1221.353  | 16.193  | 76.9   |

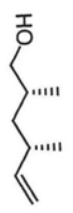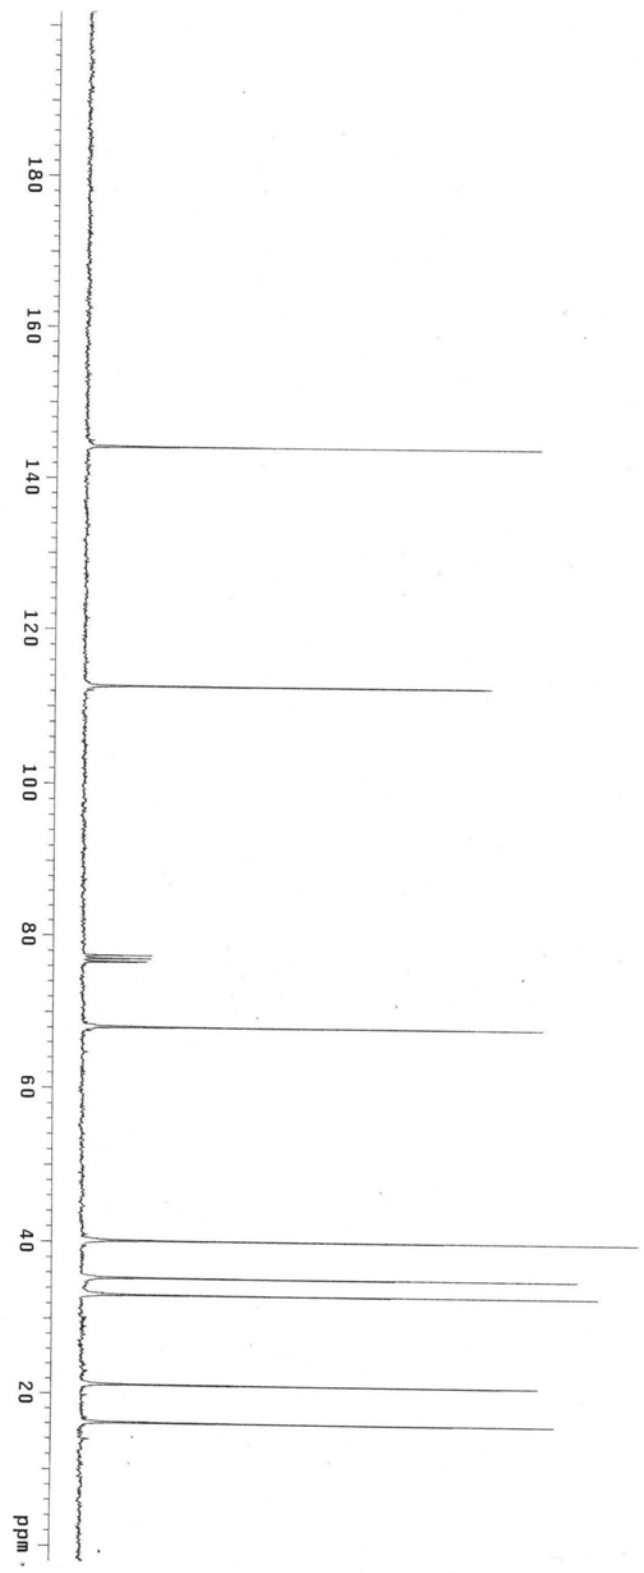



| INDEX | FREQUENCY | PPM   | HEIGHT | INDEX | FREQUENCY | PPM   | HEIGHT |
|-------|-----------|-------|--------|-------|-----------|-------|--------|
| 1     | 1703.752  | 5.680 | 9.7    | 40    | 301.800   | 1.006 | 167.1  |
| 2     | 1695.550  | 5.653 | 11.7   |       |           |       |        |
| 3     | 1693.792  | 5.647 | 11.3   |       |           |       |        |
| 4     | 1686.176  | 5.621 | 16.0   |       |           |       |        |
| 5     | 1678.560  | 5.596 | 14.4   |       |           |       |        |
| 6     | 1676.217  | 5.588 | 13.8   |       |           |       |        |
| 7     | 1668.600  | 5.563 | 11.5   |       |           |       |        |
| 8     | 1505.147  | 5.018 | 30.9   |       |           |       |        |
| 9     | 1486.985  | 4.957 | 50.4   |       |           |       |        |
| 10    | 1476.440  | 4.922 | 27.7   |       |           |       |        |
| 11    | 1475.268  | 4.918 | 23.8   |       |           |       |        |
| 12    | 758.767   | 2.530 | 11.3   |       |           |       |        |
| 13    | 751.737   | 2.506 | 20.6   |       |           |       |        |
| 14    | 744.706   | 2.483 | 20.9   |       |           |       |        |
| 15    | 737.676   | 2.459 | 12.2   |       |           |       |        |
| 16    | 670.889   | 2.237 | 11.1   |       |           |       |        |
| 17    | 663.858   | 2.213 | 15.4   |       |           |       |        |
| 18    | 656.828   | 2.190 | 12.4   |       |           |       |        |
| 19    | 649.798   | 2.166 | 8.2    |       |           |       |        |
| 20    | 596.728   | 1.789 | 12.8   |       |           |       |        |
| 21    | 590.283   | 1.768 | 14.9   |       |           |       |        |
| 22    | 527.940   | 1.760 | 13.9   |       |           |       |        |
| 23    | 523.253   | 1.744 | 20.2   |       |           |       |        |
| 24    | 521.495   | 1.739 | 15.4   |       |           |       |        |
| 25    | 516.809   | 1.723 | 19.3   |       |           |       |        |
| 26    | 514.485   | 1.715 | 17.7   |       |           |       |        |
| 27    | 508.021   | 1.694 | 14.3   |       |           |       |        |
| 28    | 427.759   | 1.426 | 10.2   |       |           |       |        |
| 29    | 418.385   | 1.395 | 16.3   |       |           |       |        |
| 30    | 412.526   | 1.375 | 18.6   |       |           |       |        |
| 31    | 410.183   | 1.367 | 18.4   |       |           |       |        |
| 32    | 404.324   | 1.348 | 24.8   |       |           |       |        |
| 33    | 398.466   | 1.328 | 15.3   |       |           |       |        |
| 34    | 396.708   | 1.323 | 15.1   |       |           |       |        |
| 35    | 390.850   | 1.303 | 12.3   |       |           |       |        |
| 36    | 375.032   | 1.250 | 8.2    |       |           |       |        |
| 37    | 352.183   | 1.174 | 156.0  |       |           |       |        |
| 38    | 343.739   | 1.153 | 151.3  |       |           |       |        |
| 39    | 308.244   | 1.028 | 162.0  |       |           |       |        |

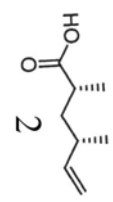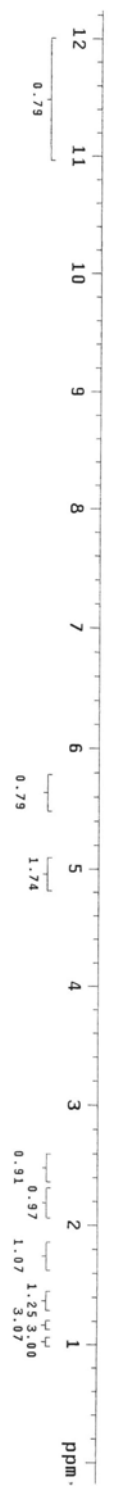

| INDEX | FREQUENCY | PPM     | HEIGHT |
|-------|-----------|---------|--------|
| 1     | 13858.223 | 183.735 | 25.3   |
| 2     | 10813.347 | 143.386 | 56.8   |
| 3     | 8584.628  | 113.552 | 74.1   |
| 4     | 5839.485  | 77.421  | 35.0   |
| 5     | 5807.723  | 77.000  | 33.0   |
| 6     | 5775.962  | 76.579  | 33.6   |
| 7     | 3010.587  | 39.915  | 74.8   |
| 8     | 2807.313  | 37.220  | 69.6   |
| 9     | 2699.324  | 35.788  | 58.5   |
| 10    | 1551.672  | 20.572  | 63.9   |
| 11    | 1253.114  | 16.614  | 79.4   |

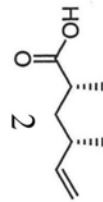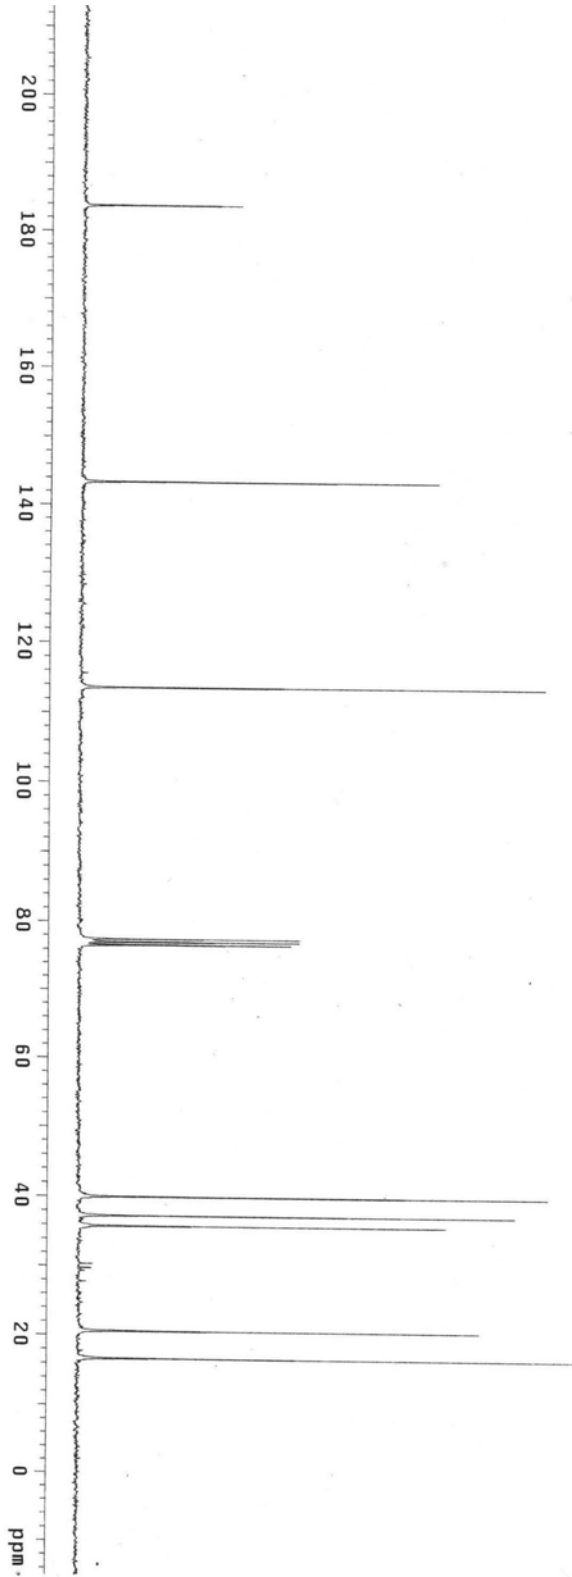

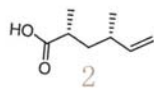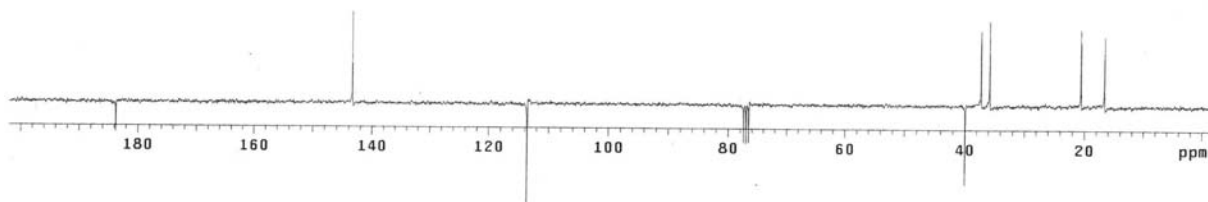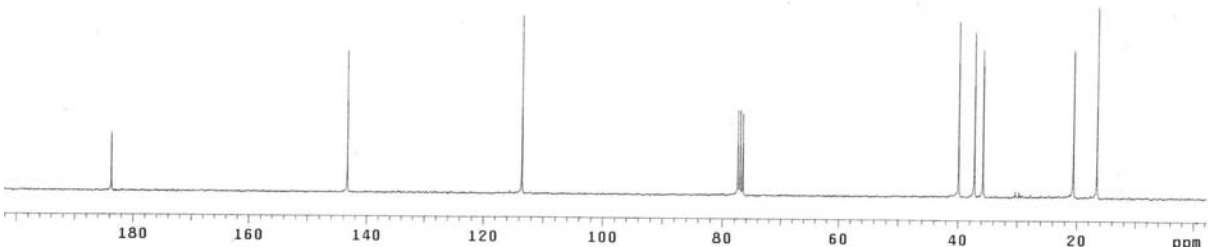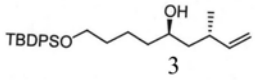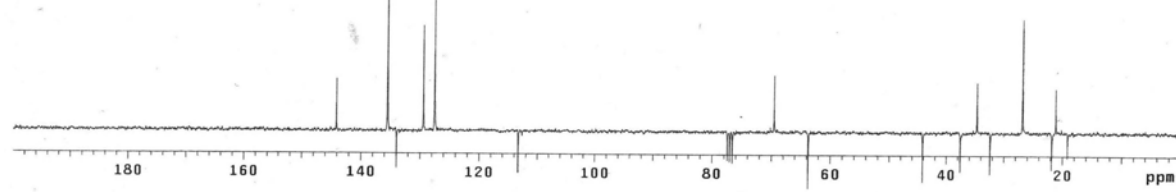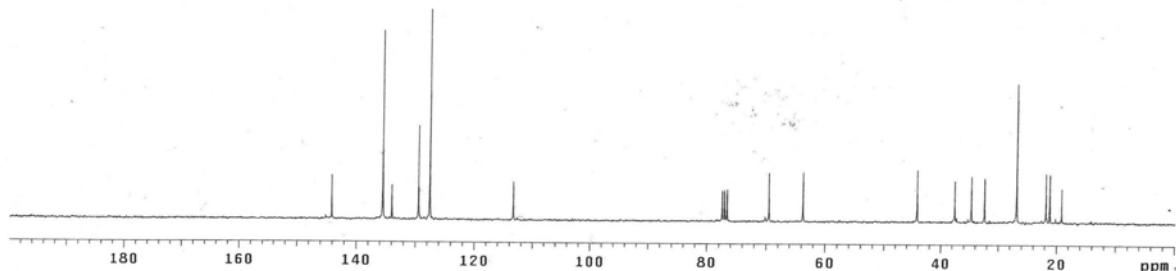

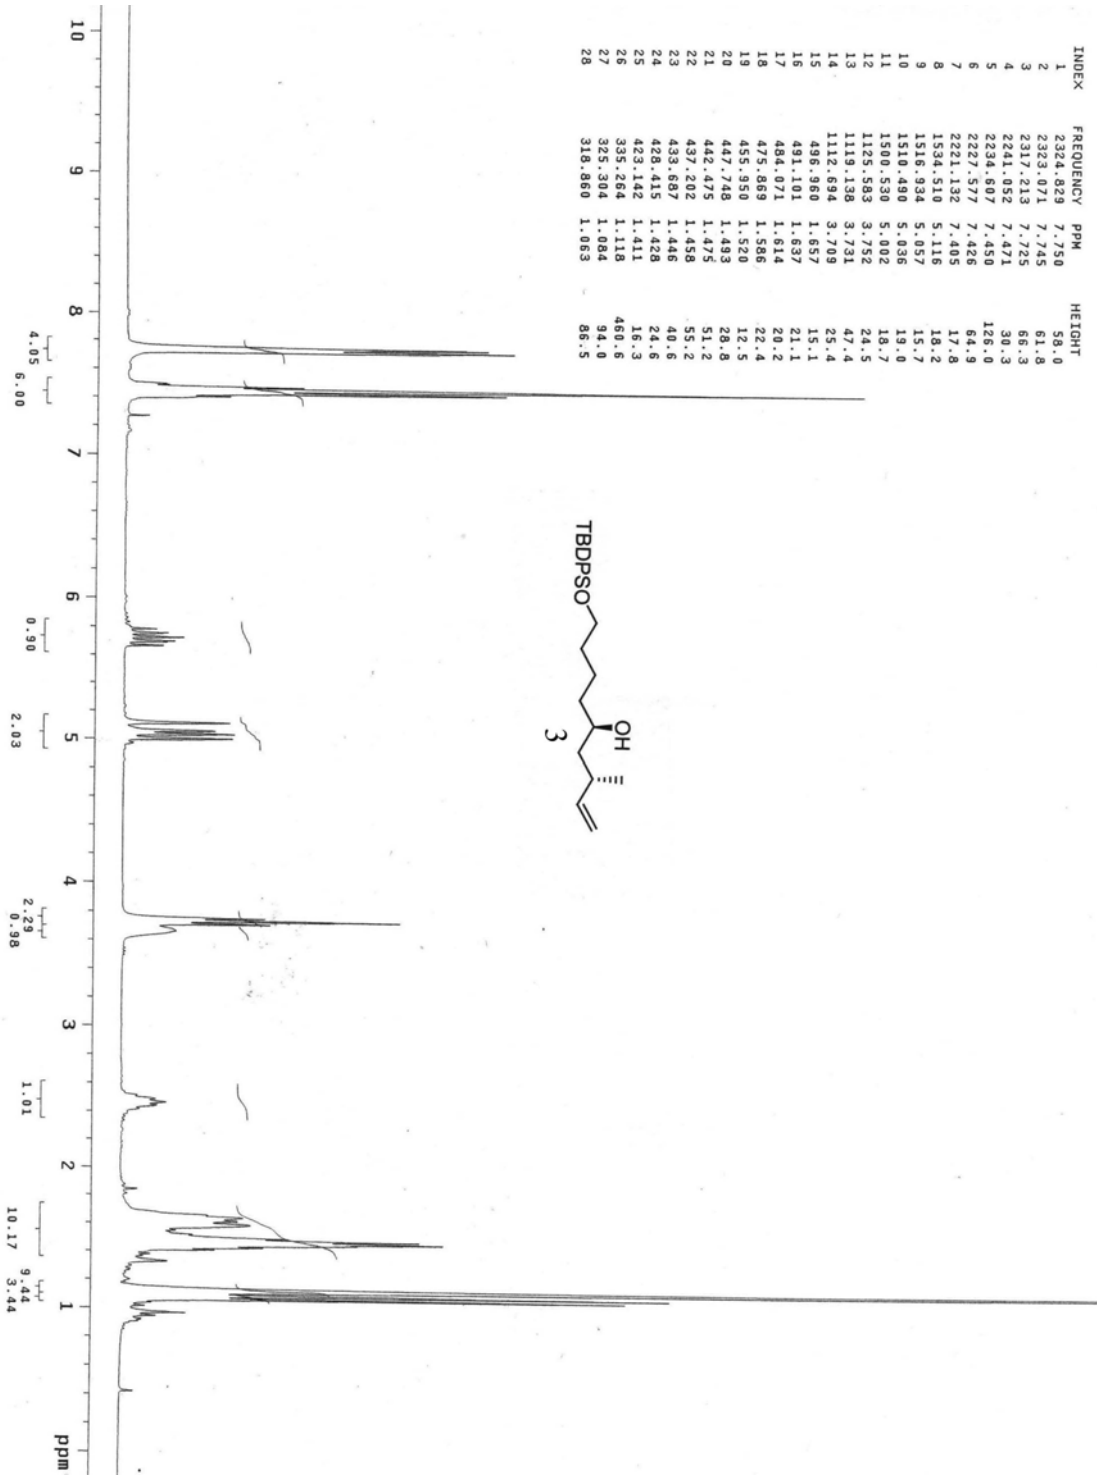

| INDEX | FREQUENCY | PPM   | HEIGHT |
|-------|-----------|-------|--------|
| 1     | 2324.829  | 7.750 | 58.0   |
| 2     | 2323.071  | 7.745 | 61.8   |
| 3     | 2317.213  | 7.725 | 66.3   |
| 4     | 2241.052  | 7.471 | 30.3   |
| 5     | 2234.607  | 7.450 | 126.0  |
| 6     | 2227.577  | 7.426 | 64.9   |
| 7     | 2221.132  | 7.405 | 17.8   |
| 8     | 1594.510  | 3.116 | 18.2   |
| 9     | 1516.934  | 5.057 | 15.7   |
| 10    | 1510.490  | 5.036 | 19.0   |
| 11    | 1500.530  | 5.002 | 18.7   |
| 12    | 1125.583  | 3.752 | 24.5   |
| 13    | 1119.138  | 3.731 | 47.4   |
| 14    | 1112.694  | 3.709 | 25.4   |
| 15    | 496.960   | 1.657 | 15.1   |
| 16    | 491.101   | 1.637 | 21.1   |
| 17    | 484.071   | 1.614 | 20.2   |
| 18    | 473.069   | 1.586 | 22.4   |
| 19    | 455.950   | 1.520 | 12.5   |
| 20    | 447.748   | 1.493 | 28.8   |
| 21    | 442.475   | 1.475 | 51.2   |
| 22    | 437.202   | 1.458 | 55.2   |
| 23    | 433.687   | 1.446 | 40.6   |
| 24    | 428.415   | 1.428 | 24.6   |
| 25    | 423.142   | 1.411 | 16.3   |
| 26    | 338.264   | 1.118 | 460.8  |
| 27    | 323.304   | 1.084 | 94.0   |
| 28    | 318.860   | 1.063 | 86.5   |

| INDEX | FREQUENCY | PPM     | HEIGHT |
|-------|-----------|---------|--------|
| 1     | 10868.401 | 144.096 | 15.0   |
| 2     | 10720.465 | 135.505 | 58.2   |
| 3     | 10104.006 | 133.961 | 12.2   |
| 4     | 9763.098  | 129.441 | 33.3   |
| 5     | 9619.113  | 127.532 | 68.5   |
| 6     | 8547.689  | 113.327 | 12.3   |
| 7     | 5839.485  | 77.421  | 10.4   |
| 8     | 5807.724  | 77.000  | 11.0   |
| 9     | 5775.962  | 76.579  | 11.4   |
| 10    | 5244.485  | 69.532  | 15.7   |
| 11    | 4806.176  | 63.721  | 17.7   |
| 12    | 3330.321  | 44.154  | 17.7   |
| 13    | 2832.723  | 37.557  | 15.4   |
| 14    | 2614.627  | 34.665  | 16.4   |
| 15    | 2445.232  | 32.419  | 16.4   |
| 16    | 2021.744  | 26.805  | 48.1   |
| 17    | 1644.840  | 21.808  | 14.5   |
| 18    | 1536.139  | 21.162  | 18.8   |
| 19    | 1443.684  | 19.141  | 11.5   |

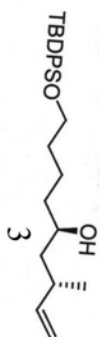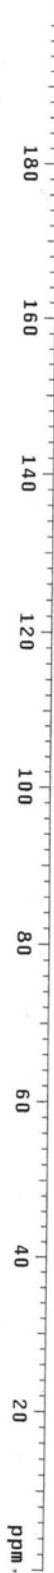

| INDEX | FREQUENCY | PPM   | HEIGHT |
|-------|-----------|-------|--------|
| 1     | 1114.297  | 3.715 | 13.8   |
| 2     | 1109.024  | 3.697 | 13.2   |
| 3     | 1009.429  | 3.365 | 74.1   |
| 4     | 1004.156  | 3.348 | 64.7   |
| 5     | 991.853   | 3.307 | 15.7   |
| 6     | 434.119   | 1.447 | 16.1   |
| 7     | 430.604   | 1.436 | 22.5   |
| 8     | 425.391   | 1.418 | 25.6   |
| 9     | 422.988   | 1.410 | 28.2   |
| 10    | 418.887   | 1.396 | 35.1   |
| 11    | 416.543   | 1.389 | 32.8   |
| 12    | 406.927   | 1.363 | 14.4   |
| 13    | 402.483   | 1.342 | 16.9   |
| 14    | 354.443   | 1.182 | 15.5   |
| 15    | 336.281   | 1.121 | 143.0  |
| 16    | 329.837   | 1.100 | 133.6  |
| 17    | 253.675   | 0.846 | 17.1   |
| 18    | 247.231   | 0.824 | 138.4  |
| 19    | 240.787   | 0.803 | 121.0  |

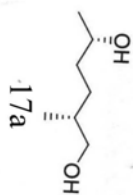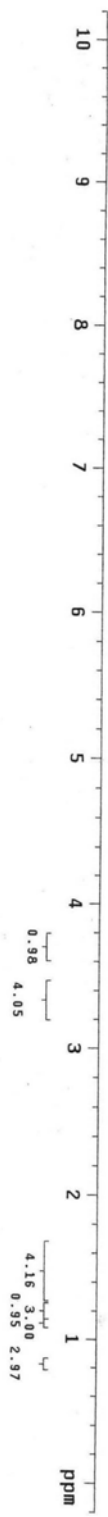

| INDEX | FREQUENCY | PPM    | HEIGHT |
|-------|-----------|--------|--------|
| 1     | 5839.485  | 77.421 | 8.5    |
| 2     | 5807.724  | 77.000 | 8.7    |
| 3     | 5775.982  | 76.579 | 8.1    |
| 4     | 5132.281  | 68.045 | 6.1    |
| 5     | 5083.560  | 67.399 | 49.4   |
| 6     | 5072.973  | 67.239 | 45.6   |
| 7     | 2737.438  | 36.294 | 5.5    |
| 8     | 2686.620  | 35.620 | 39.9   |
| 9     | 2637.919  | 34.974 | 40.4   |
| 10    | 2189.022  | 29.023 | 5.0    |
| 11    | 2150.908  | 28.517 | 35.6   |
| 12    | 1750.712  | 23.211 | 51.6   |
| 13    | 1257.349  | 16.670 | 4.8    |
| 14    | 1231.940  | 16.333 | 40.8   |

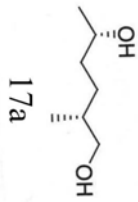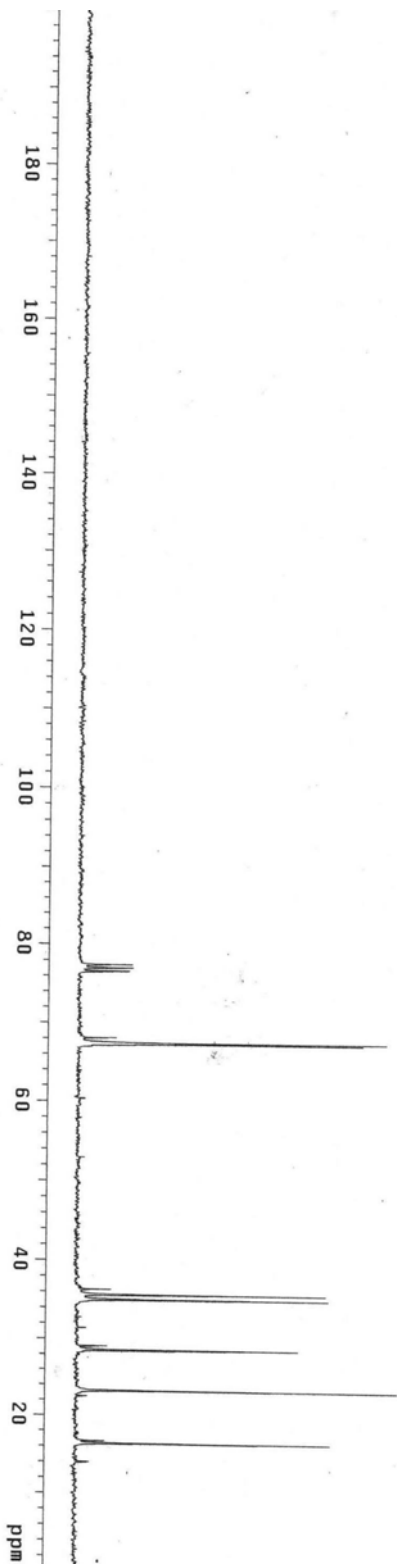

| INDEX | FREQUENCY | PPM   | HEIGHT |
|-------|-----------|-------|--------|
| 1     | 1108.007  | 3.694 | 24.0   |
| 2     | 1103.906  | 3.680 | 32.4   |
| 3     | 1097.462  | 3.659 | 32.2   |
| 4     | 1006.068  | 3.354 | 74.6   |
| 5     | 1003.725  | 3.346 | 70.4   |
| 6     | 454.192   | 1.514 | 34.8   |
| 7     | 451.849   | 1.506 | 34.3   |
| 8     | 445.061   | 1.477 | 26.4   |
| 9     | 440.132   | 1.467 | 25.4   |
| 10    | 437.788   | 1.459 | 24.3   |
| 11    | 420.213   | 1.401 | 32.7   |
| 12    | 413.768   | 1.379 | 32.1   |
| 13    | 409.081   | 1.364 | 30.5   |
| 14    | 403.809   | 1.346 | 21.0   |
| 15    | 396.435   | 1.122 | 132.0  |
| 16    | 394.092   | 1.114 | 135.1  |
| 17    | 390.577   | 1.102 | 142.9  |
| 18    | 327.648   | 1.092 | 134.3  |
| 19    | 255.001   | 0.850 | 94.3   |
| 20    | 253.244   | 0.844 | 108.1  |
| 21    | 248.557   | 0.829 | 138.4  |
| 22    | 246.799   | 0.823 | 133.2  |
| 23    | 242.113   | 0.807 | 50.4   |

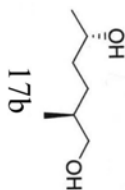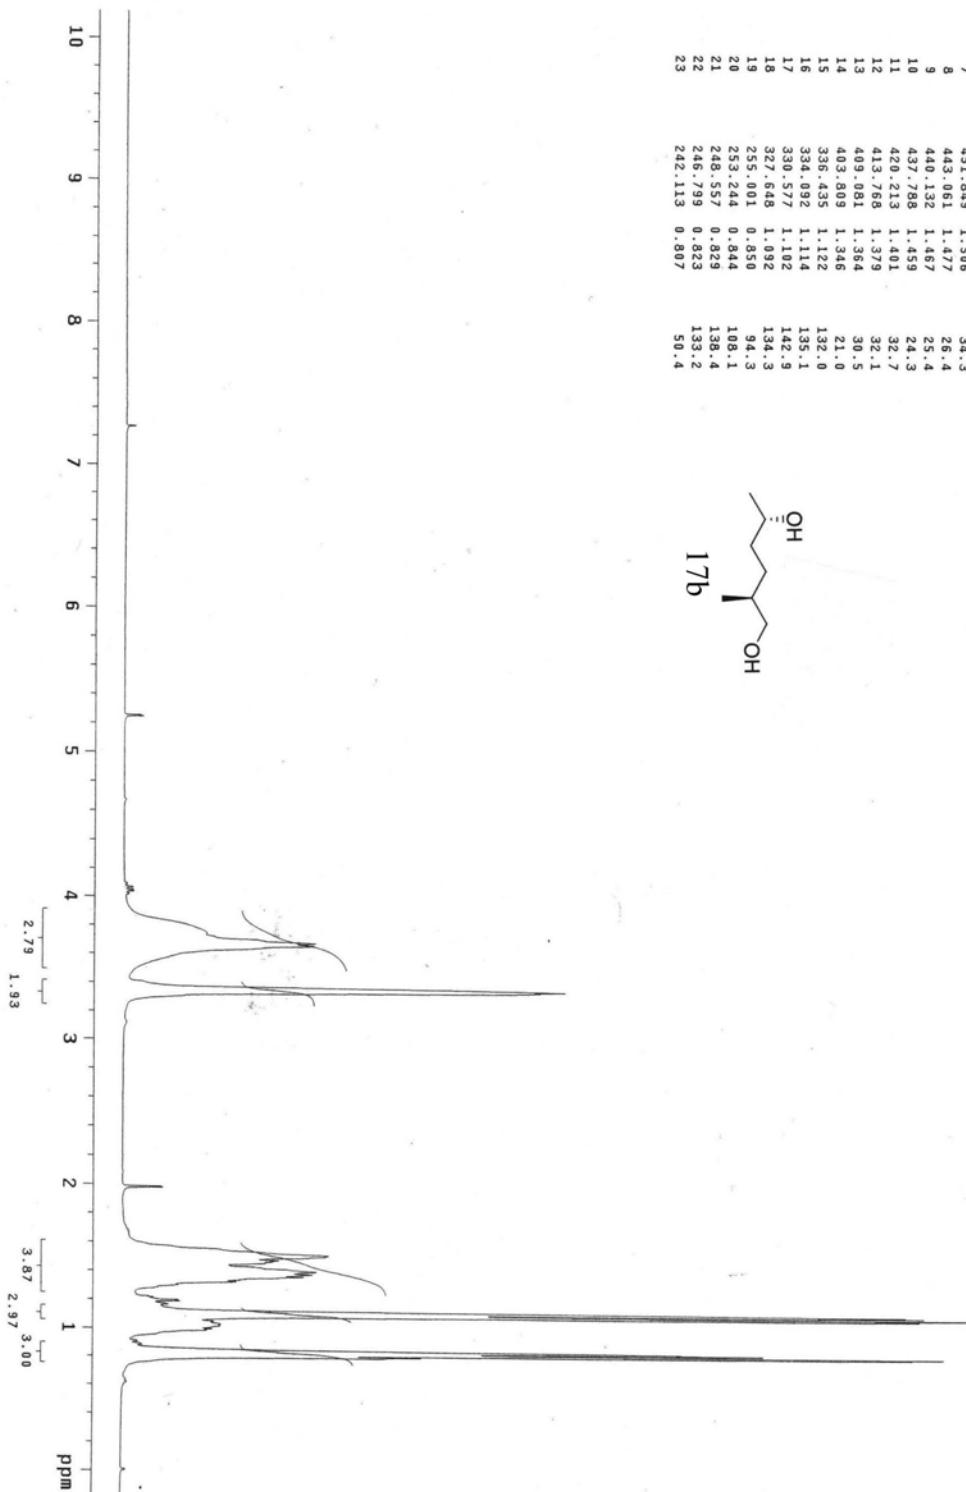



| INDEX | FREQUENCY | PPM    | HEIGHT |
|-------|-----------|--------|--------|
| 1     | 5839.485  | 77.421 | 11.8   |
| 2     | 5807.724  | 77.000 | 11.5   |
| 3     | 5775.962  | 76.579 | 10.9   |
| 4     | 5132.261  | 68.045 | 29.3   |
| 5     | 5085.677  | 67.427 | 9.5    |
| 6     | 5066.820  | 67.174 | 33.7   |
| 7     | 2739.556  | 36.322 | 40.0   |
| 8     | 2682.385  | 35.564 | 45.8   |
| 9     | 2640.036  | 35.002 | 12.0   |
| 10    | 2189.022  | 29.023 | 38.0   |
| 11    | 2153.025  | 28.545 | 9.7    |
| 12    | 1754.947  | 23.267 | 38.8   |
| 13    | 1257.349  | 16.670 | 46.6   |
| 14    | 1234.057  | 16.361 | 9.7    |

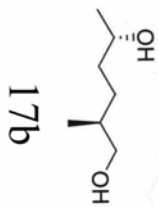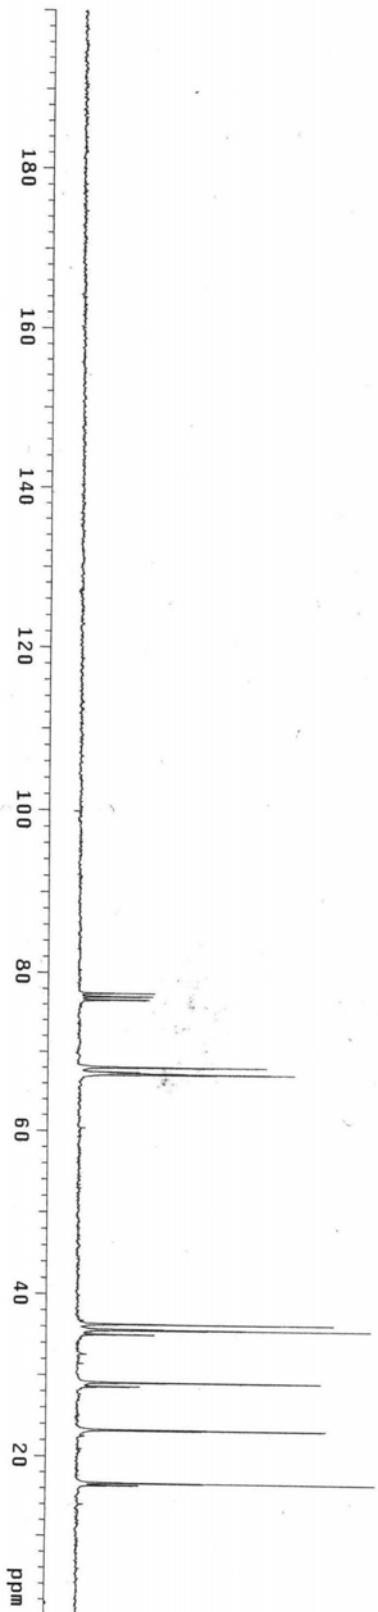

| INDEX | FREQUENCY | PPM   | HEIGHT |
|-------|-----------|-------|--------|
| 1     | 2343.576  | 7.813 | 22.7   |
| 2     | 2341.819  | 7.807 | 23.6   |
| 3     | 2339.475  | 7.799 | 18.1   |
| 4     | 2336.546  | 7.790 | 22.8   |
| 5     | 2334.203  | 7.782 | 17.4   |
| 6     | 2248.688  | 7.497 | 44.0   |
| 7     | 2242.809  | 7.477 | 21.7   |
| 8     | 2237.536  | 7.459 | 5.6    |
| 9     | 2236.365  | 7.456 | 6.0    |
| 10    | 1090.431  | 3.635 | 7.0    |
| 11    | 1084.573  | 3.616 | 7.1    |
| 12    | 1075.785  | 3.586 | 6.5    |
| 13    | 1069.926  | 3.567 | 6.1    |
| 14    | 419.627   | 1.399 | 8.8    |
| 15    | 414.940   | 1.383 | 12.3   |
| 16    | 410.839   | 1.370 | 9.0    |
| 17    | 409.081   | 1.364 | 9.0    |
| 18    | 354.597   | 1.182 | 148.1  |
| 19    | 315.345   | 1.051 | 27.6   |
| 20    | 308.314   | 1.028 | 28.0   |
| 21    | 303.627   | 1.012 | 11.6   |
| 22    | 297.183   | 0.991 | 17.1   |
| 23    | 290.153   | 0.967 | 8.2    |
| 24    | 284.880   | 0.950 | 7.6    |
| 25    | 280.779   | 0.936 | 9.0    |

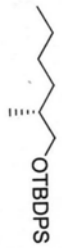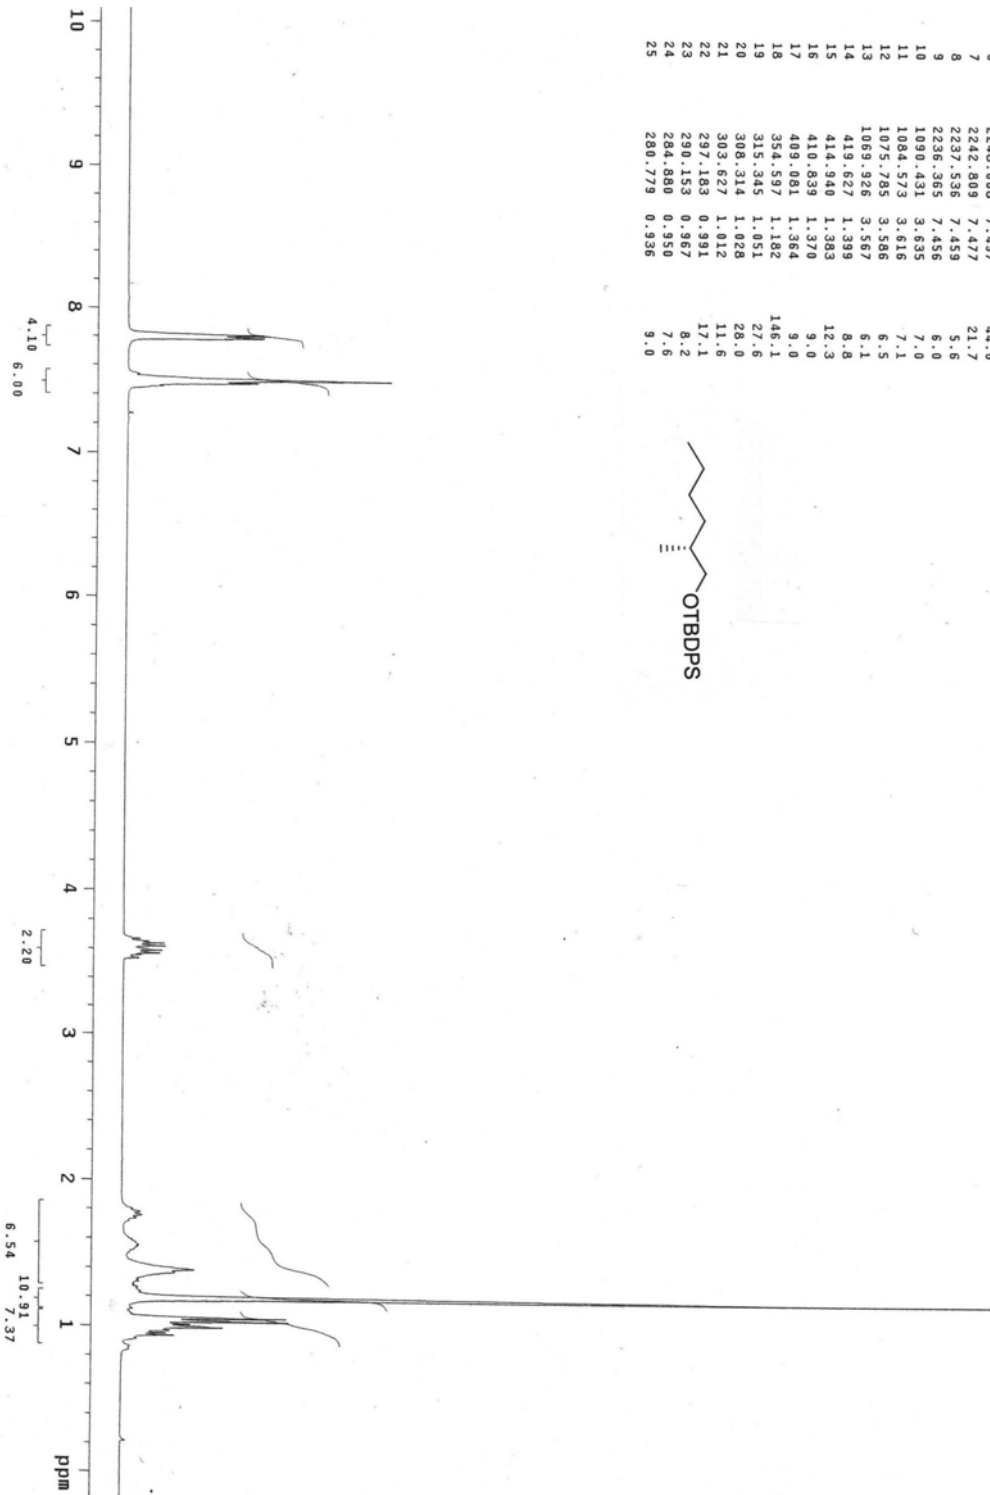

| INDEX | FREQUENCY | PPM     | HEIGHT |
|-------|-----------|---------|--------|
| 1     | 10231.052 | 135.645 | 62.8   |
| 2     | 10116.710 | 134.129 | 11.6   |
| 3     | 9765.216  | 129.469 | 39.8   |
| 4     | 9821.230  | 127.560 | 75.2   |
| 5     | 5200.019  | 68.943  | 14.5   |
| 6     | 2692.972  | 35.704  | 14.2   |
| 7     | 2476.993  | 32.040  | 12.3   |
| 8     | 2203.844  | 29.219  | 11.8   |
| 9     | 2026.096  | 26.889  | 56.0   |
| 10    | 1733.773  | 22.987  | 14.2   |
| 11    | 1458.506  | 19.337  | 10.7   |
| 12    | 1278.523  | 16.951  | 12.3   |
| 13    | 1064.662  | 14.116  | 13.1   |

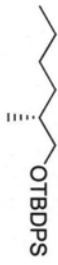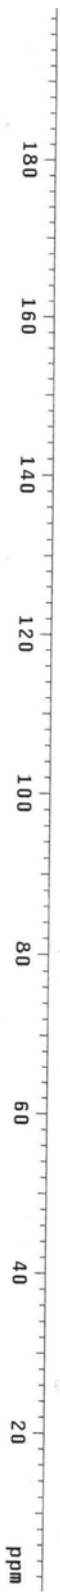

| INDEX | FREQUENCY | PPM   | HEIGHT |
|-------|-----------|-------|--------|
| 1     | 1025.987  | 3.420 | 36.1   |
| 2     | 1022.472  | 3.409 | 35.2   |
| 3     | 1019.543  | 3.399 | 33.5   |
| 4     | 1003.725  | 3.346 | 28.1   |
| 5     | 1000.210  | 3.334 | 31.3   |
| 6     | 996.694   | 3.323 | 32.9   |
| 7     | 993.755   | 3.313 | 35.5   |
| 8     | 465.909   | 1.553 | 25.5   |
| 9     | 462.394   | 1.542 | 22.6   |
| 10    | 460.051   | 1.534 | 27.4   |
| 11    | 408.496   | 1.362 | 23.0   |
| 12    | 406.798   | 1.356 | 23.5   |
| 13    | 403.223   | 1.344 | 25.0   |
| 14    | 396.193   | 1.321 | 40.7   |
| 15    | 392.677   | 1.309 | 51.5   |
| 16    | 388.576   | 1.295 | 40.1   |
| 17    | 383.304   | 1.276 | 74.4   |
| 18    | 382.132   | 1.274 | 75.8   |
| 19    | 378.617   | 1.262 | 82.8   |
| 20    | 375.688   | 1.252 | 93.0   |
| 21    | 373.930   | 1.247 | 95.3   |
| 22    | 369.243   | 1.231 | 82.4   |
| 23    | 356.354   | 1.188 | 26.5   |
| 24    | 314.759   | 1.049 | 29.5   |
| 25    | 313.001   | 1.043 | 30.1   |
| 26    | 304.799   | 1.016 | 27.0   |
| 27    | 260.860   | 0.870 | 323.0  |
| 28    | 258.517   | 0.862 | 280.0  |
| 29    | 253.830   | 0.846 | 386.9  |
| 30    | 252.072   | 0.840 | 277.8  |

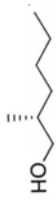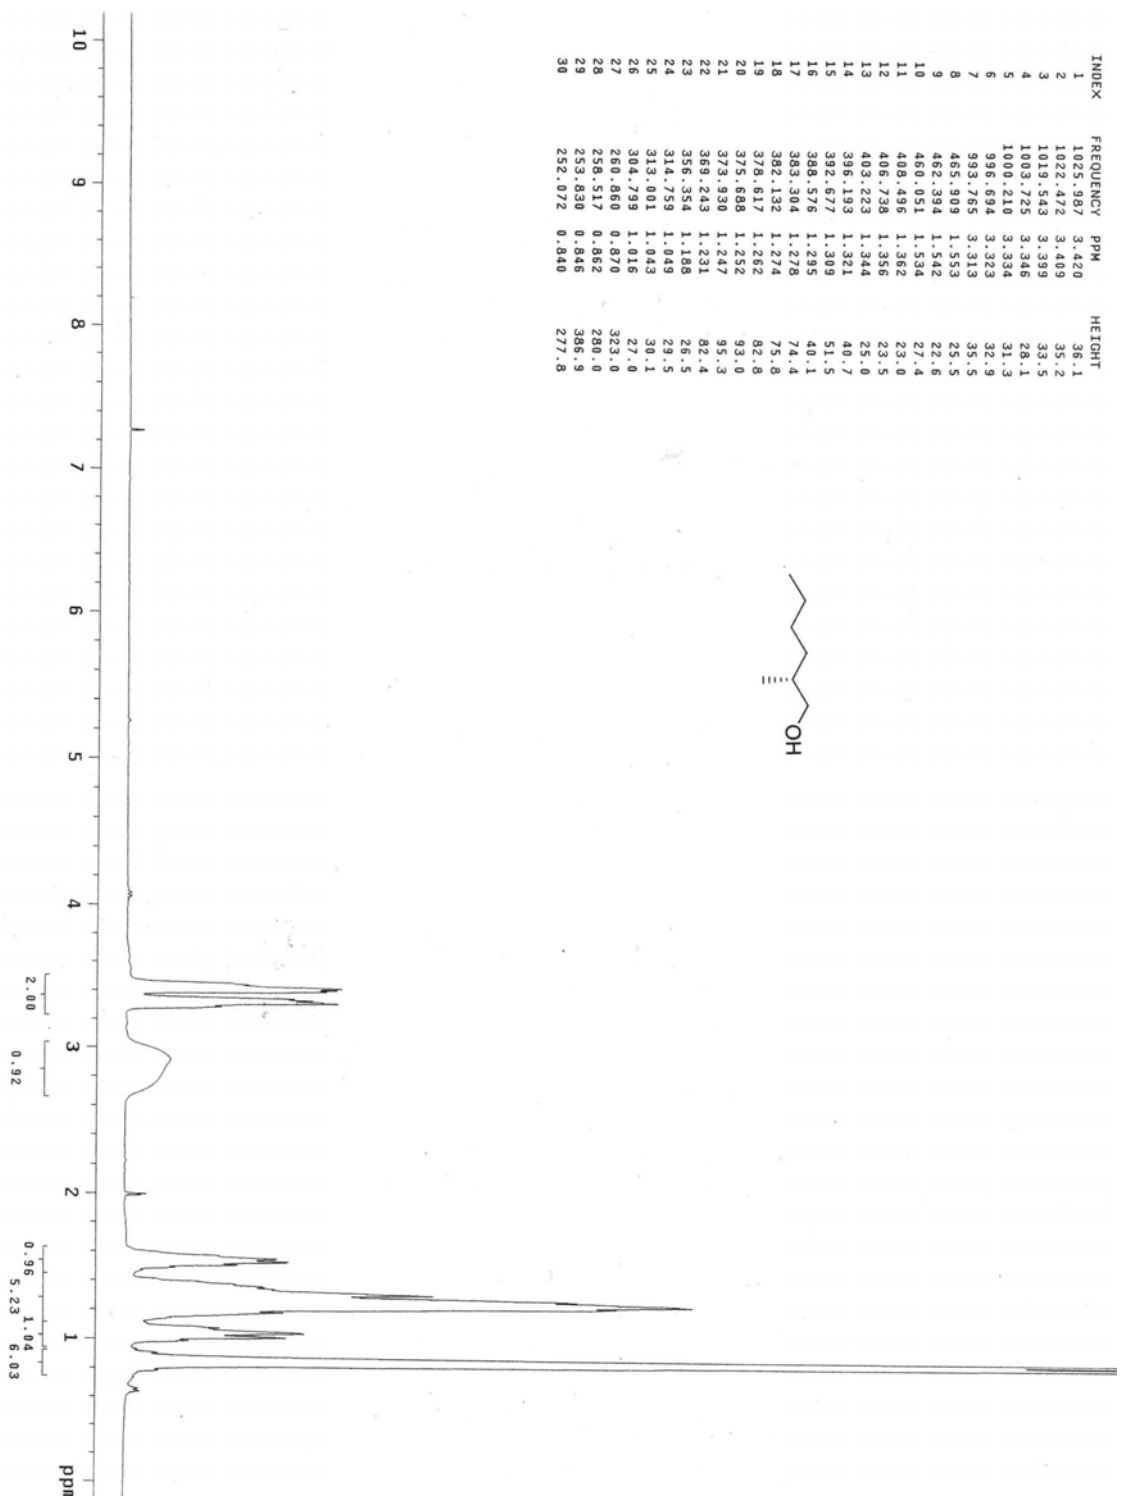

| INDEX | FREQUENCY | PPM    | HEIGHT |
|-------|-----------|--------|--------|
| 1     | 5839.485  | 77.421 | 12.1   |
| 2     | 5807.723  | 77.000 | 13.1   |
| 3     | 5775.962  | 76.579 | 14.2   |
| 4     | 5128.026  | 67.988 | 65.8   |
| 5     | 2684.502  | 35.592 | 81.6   |
| 6     | 2474.876  | 32.812 | 86.4   |
| 7     | 2197.491  | 29.135 | 84.2   |
| 8     | 1727.420  | 22.902 | 72.3   |
| 9     | 1242.527  | 16.474 | 95.9   |
| 10    | 1051.957  | 13.947 | 82.8   |

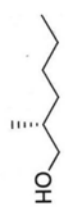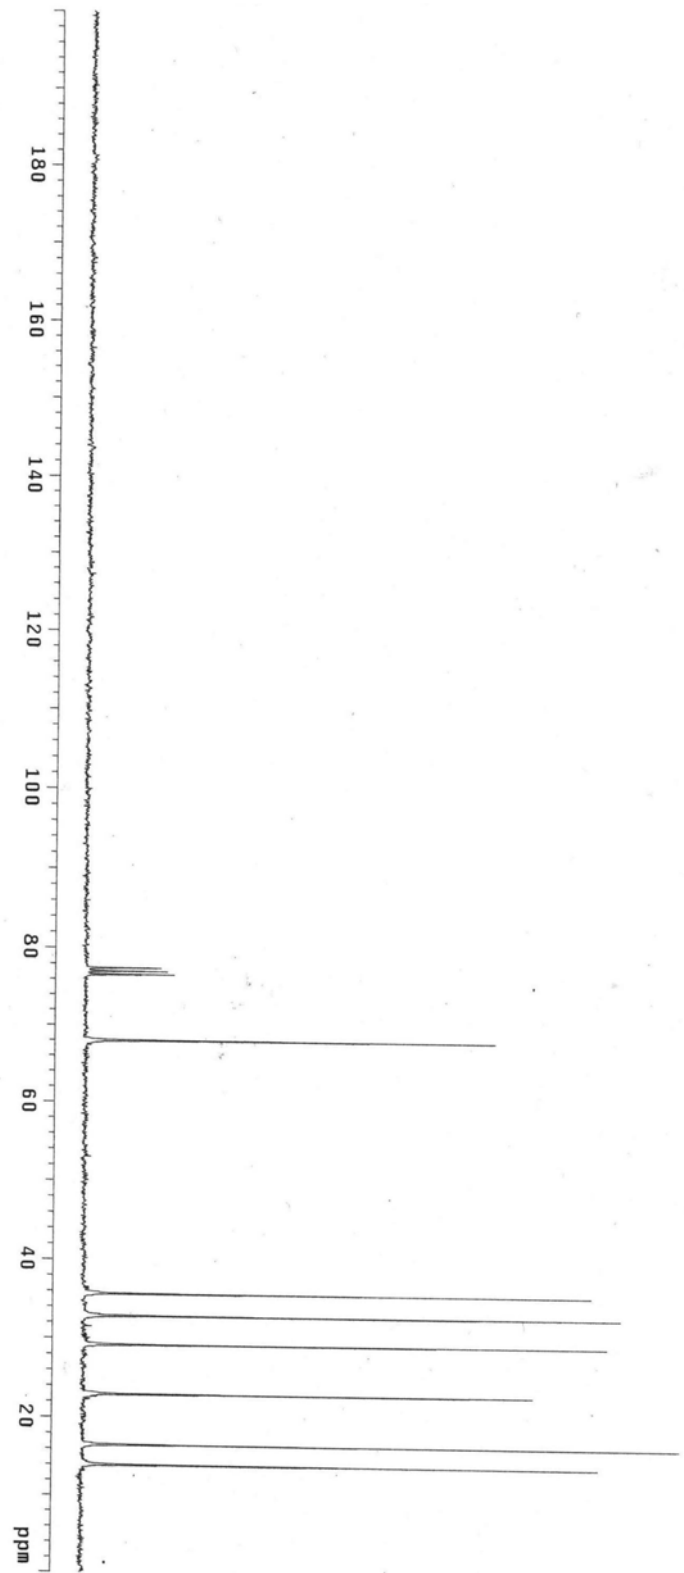

| INDEX | FREQUENCY | PPM    | HEIGHT |
|-------|-----------|--------|--------|
| 1     | -0.000    | -0.000 | 663.5  |

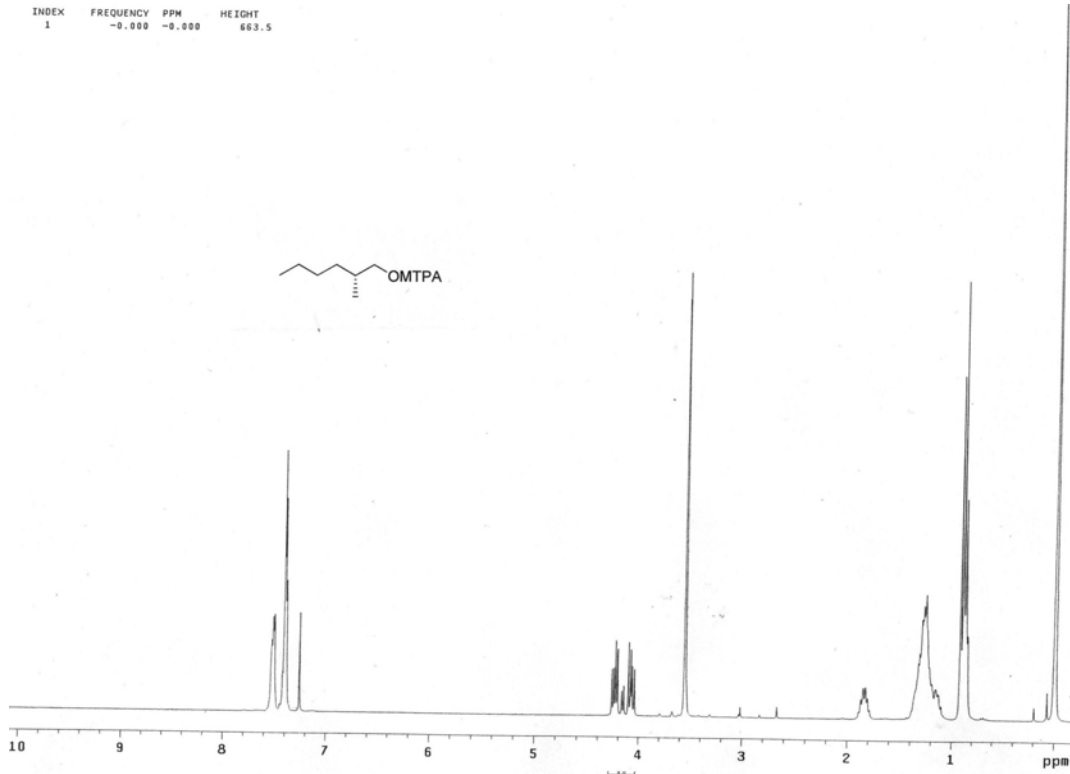

| INDEX | FREQUENCY | PPM   | HEIGHT |
|-------|-----------|-------|--------|
| 1     | 1279.923  | 4.284 | 38.0   |
| 2     | 1275.450  | 4.246 | 39.1   |
| 3     | 1268.377  | 4.228 | 61.1   |
| 4     | 1262.519  | 4.209 | 54.5   |
| 5     | 1249.044  | 4.184 | 29.1   |
| 6     | 1243.185  | 4.165 | 24.4   |
| 7     | 1229.711  | 4.100 | 59.9   |
| 8     | 1223.266  | 4.076 | 54.0   |
| 9     | 1219.165  | 4.064 | 48.5   |
| 10    | 1212.135  | 4.041 | 37.8   |

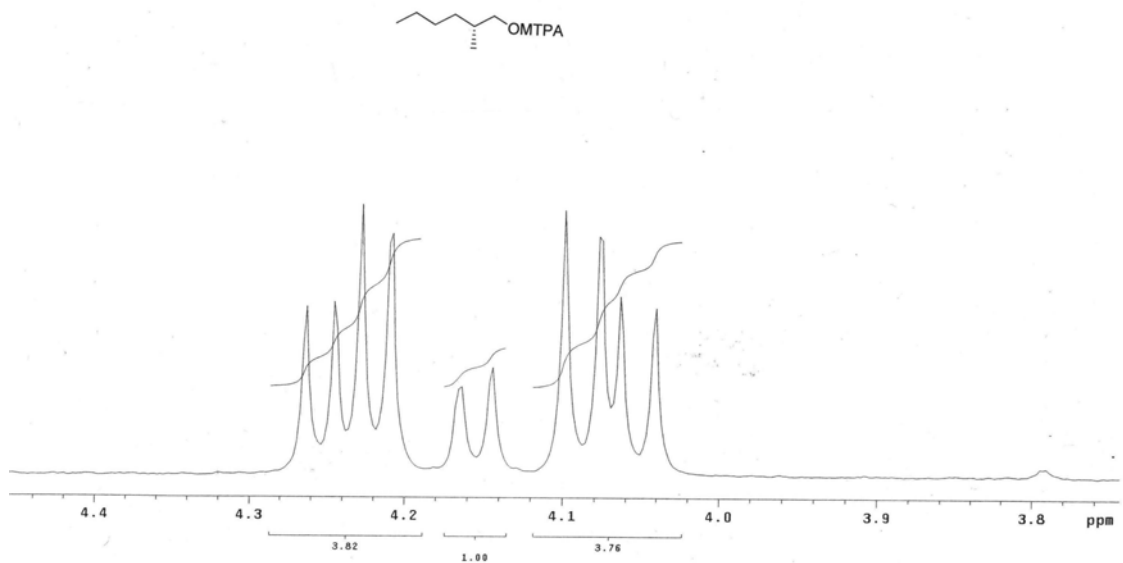

| INDEX | FREQUENCY PPM | HEIGHT |
|-------|---------------|--------|
| 1     | 2283.685      | 7.613  |
| 2     | 2281.907      | 7.607  |
| 3     | 2276.049      | 7.588  |
| 4     | 2274.281      | 7.582  |
| 5     | 2208.918      | 7.357  |
| 6     | 2203.988      | 7.348  |
| 7     | 2202.231      | 7.342  |
| 8     | 2199.301      | 7.332  |
| 9     | 2194.615      | 7.316  |
| 10    | 2191.685      | 7.307  |
| 11    | 2185.827      | 7.287  |
| 12    | 2183.483      | 7.279  |
| 13    | 2154.776      | 7.184  |
| 14    | 1224.962      | 5.084  |
| 15    | 1523.810      | 5.080  |
| 16    | 1519.709      | 5.066  |
| 17    | 1507.992      | 5.027  |
| 18    | 1492.035      | 3.641  |
| 19    | 1490.277      | 3.635  |
| 20    | 1086.176      | 3.621  |
| 21    | 1080.318      | 3.602  |
| 22    | 839.188       | 2.131  |
| 23    | 625.694       | 2.086  |
| 24    | 621.593       | 2.072  |
| 25    | 485.088       | 1.617  |
| 26    | 483.331       | 1.611  |
| 27    | 479.816       | 1.600  |
| 28    | 477.472       | 1.592  |
| 29    | 473.957       | 1.580  |
| 30    | 472.200       | 1.574  |
| 31    | 466.939       | 1.561  |
| 32    | 462.828       | 1.543  |
| 33    | 432.361       | 1.441  |
| 34    | 299.372       | 0.998  |
| 35    | 298.443       | 0.988  |
| 36    | 293.514       | 0.979  |

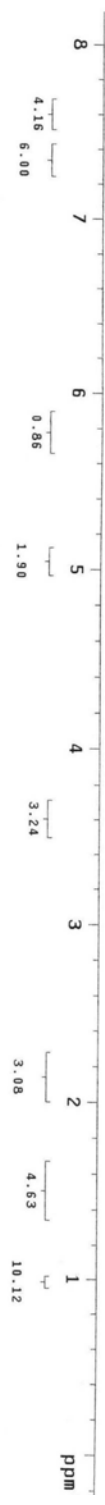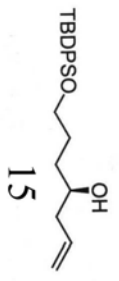

| INDEX | FREQUENCY | PPM     | HEIGHT |
|-------|-----------|---------|--------|
| 1     | 10216.231 | 135.449 | 50.3   |
| 2     | 10173.882 | 134.887 | 11.6   |
| 3     | 10074.362 | 133.568 | 9.7    |
| 4     | 9767.334  | 129.497 | 23.1   |
| 5     | 9619.113  | 127.532 | 50.7   |
| 6     | 8869.540  | 117.594 | 14.3   |
| 7     | 5839.486  | 77.421  | 5.6    |
| 8     | 5807.724  | 77.000  | 5.5    |
| 9     | 5773.845  | 76.551  | 5.3    |
| 10    | 5308.009  | 70.375  | 13.0   |
| 11    | 4825.233  | 63.974  | 13.2   |
| 12    | 3154.574  | 41.824  | 14.0   |
| 13    | 2517.225  | 33.374  | 14.4   |
| 14    | 2161.496  | 28.658  | 12.9   |
| 15    | 2017.510  | 26.749  | 41.0   |
| 16    | 1437.332  | 19.056  | 8.7    |

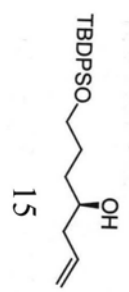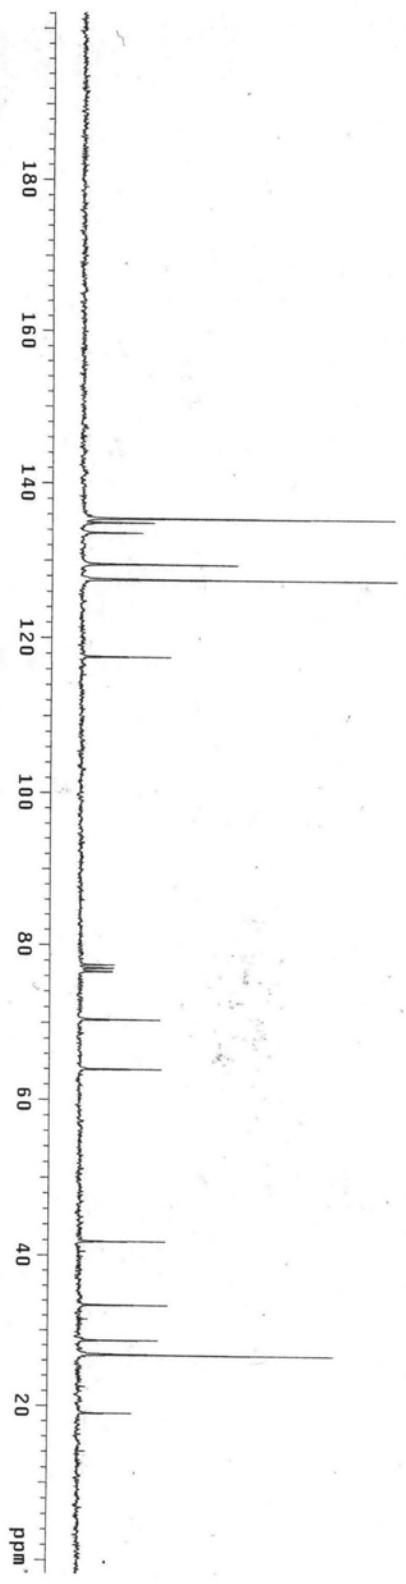



| INDEX | FREQUENCY | PPM   | HEIGHT |
|-------|-----------|-------|--------|
| 1     | 2316.041  | 7.721 | 27.8   |
| 2     | 2309.011  | 7.698 | 31.5   |
| 3     | 2295.779  | 7.454 | 13.0   |
| 4     | 2229.920  | 7.434 | 64.6   |
| 5     | 2225.819  | 7.420 | 15.0   |
| 6     | 2222.304  | 7.409 | 33.9   |
| 7     | 1124.411  | 3.749 | 12.1   |
| 8     | 1119.138  | 3.731 | 23.2   |
| 9     | 1113.280  | 3.711 | 13.3   |
| 10    | 508.333   | 1.668 | 10.2   |
| 11    | 503.404   | 1.678 | 10.4   |
| 12    | 470.010   | 1.567 | 12.9   |
| 13    | 465.909   | 1.553 | 12.9   |
| 14    | 462.980   | 1.543 | 10.6   |
| 15    | 328.233   | 1.094 | 217.3  |
| 16    | 291.910   | 0.973 | 42.0   |
| 17    | 284.880   | 0.950 | 44.4   |

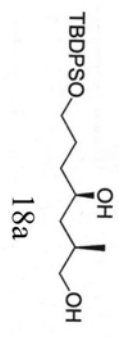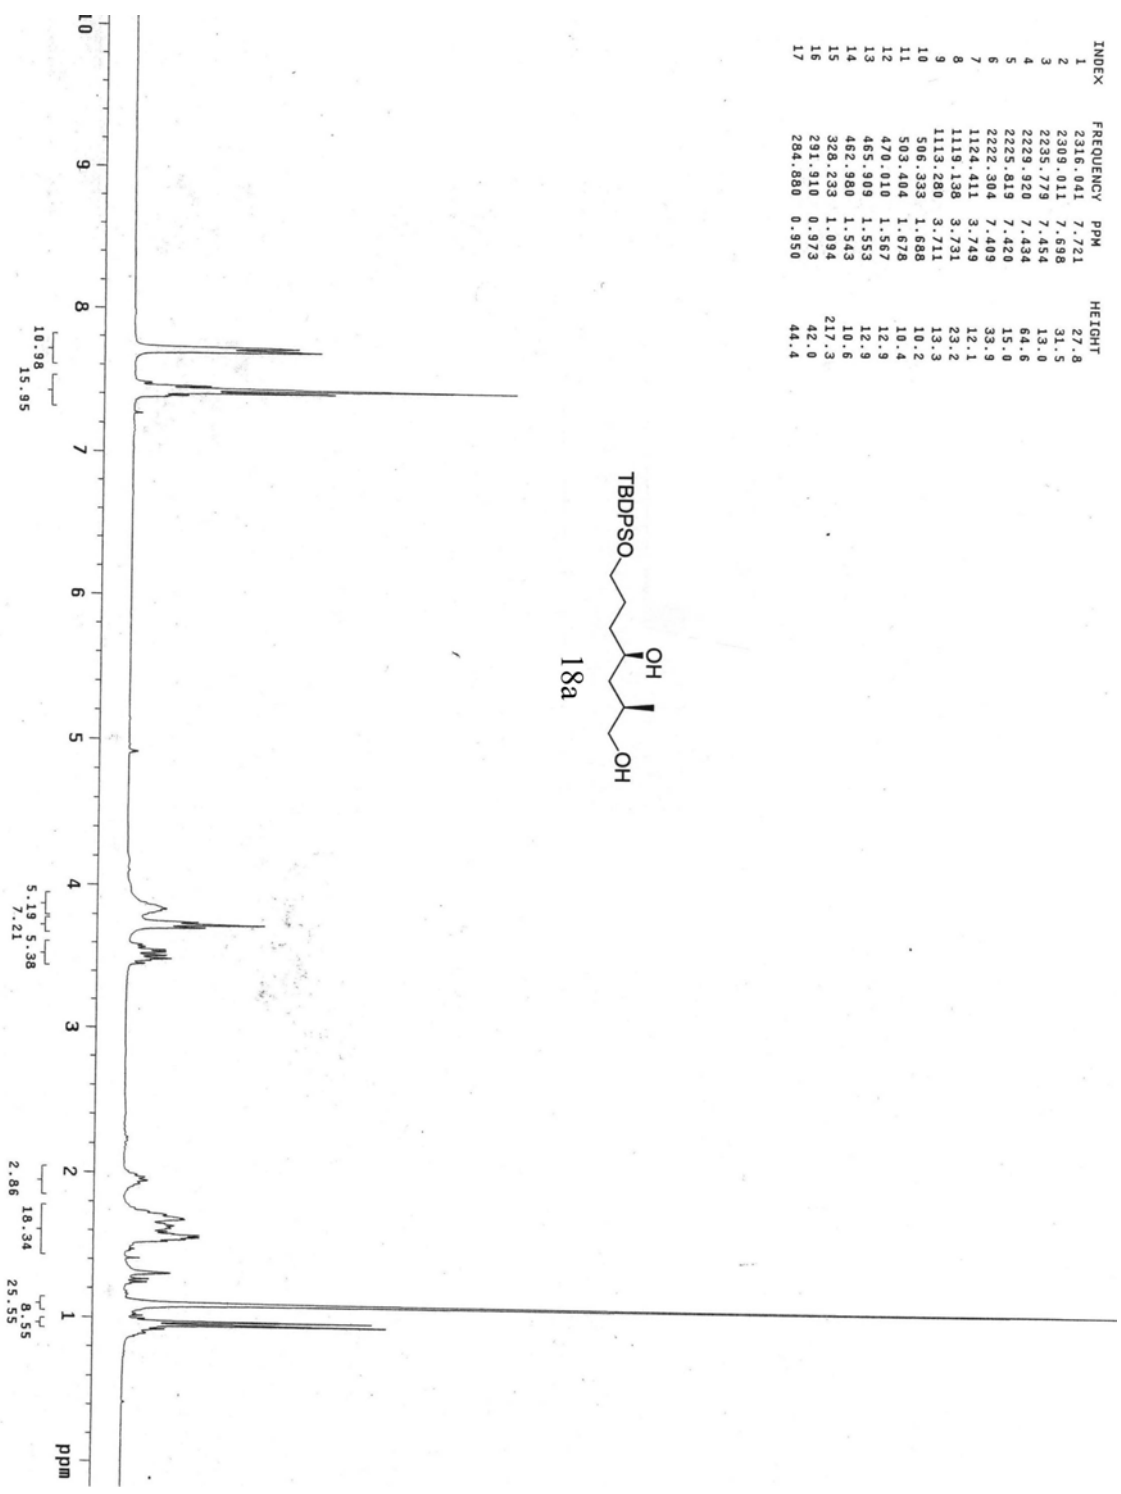

| INDEX | FREQUENCY | PPM     | HEIGHT |
|-------|-----------|---------|--------|
| 1     | 10220.485 | 133.505 | 51.3   |
| 2     | 10063.774 | 133.428 | 8.2    |
| 3     | 9777.920  | 129.638 | 31.0   |
| 4     | 9627.582  | 127.644 | 59.4   |
| 5     | 5839.485  | 77.421  | 13.1   |
| 6     | 5807.723  | 77.000  | 13.2   |
| 7     | 5775.982  | 76.579  | 12.5   |
| 8     | 5185.197  | 68.746  | 14.7   |
| 9     | 5115.321  | 67.820  | 15.3   |
| 10    | 4850.641  | 64.311  | 14.5   |
| 11    | 3158.808  | 41.860  | 13.9   |
| 12    | 2610.392  | 34.809  | 11.4   |
| 13    | 2424.057  | 32.139  | 12.1   |
| 14    | 2189.022  | 29.023  | 14.7   |
| 15    | 2017.509  | 26.749  | 42.7   |
| 16    | 1439.448  | 19.085  | 9.6    |
| 17    | 1310.285  | 17.372  | 14.4   |

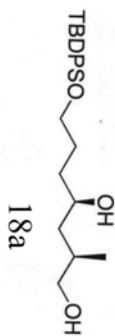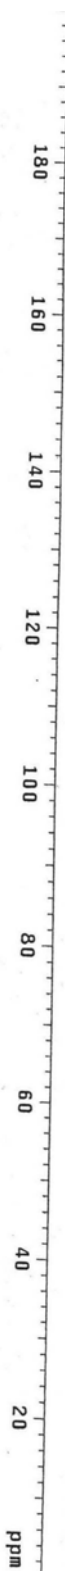

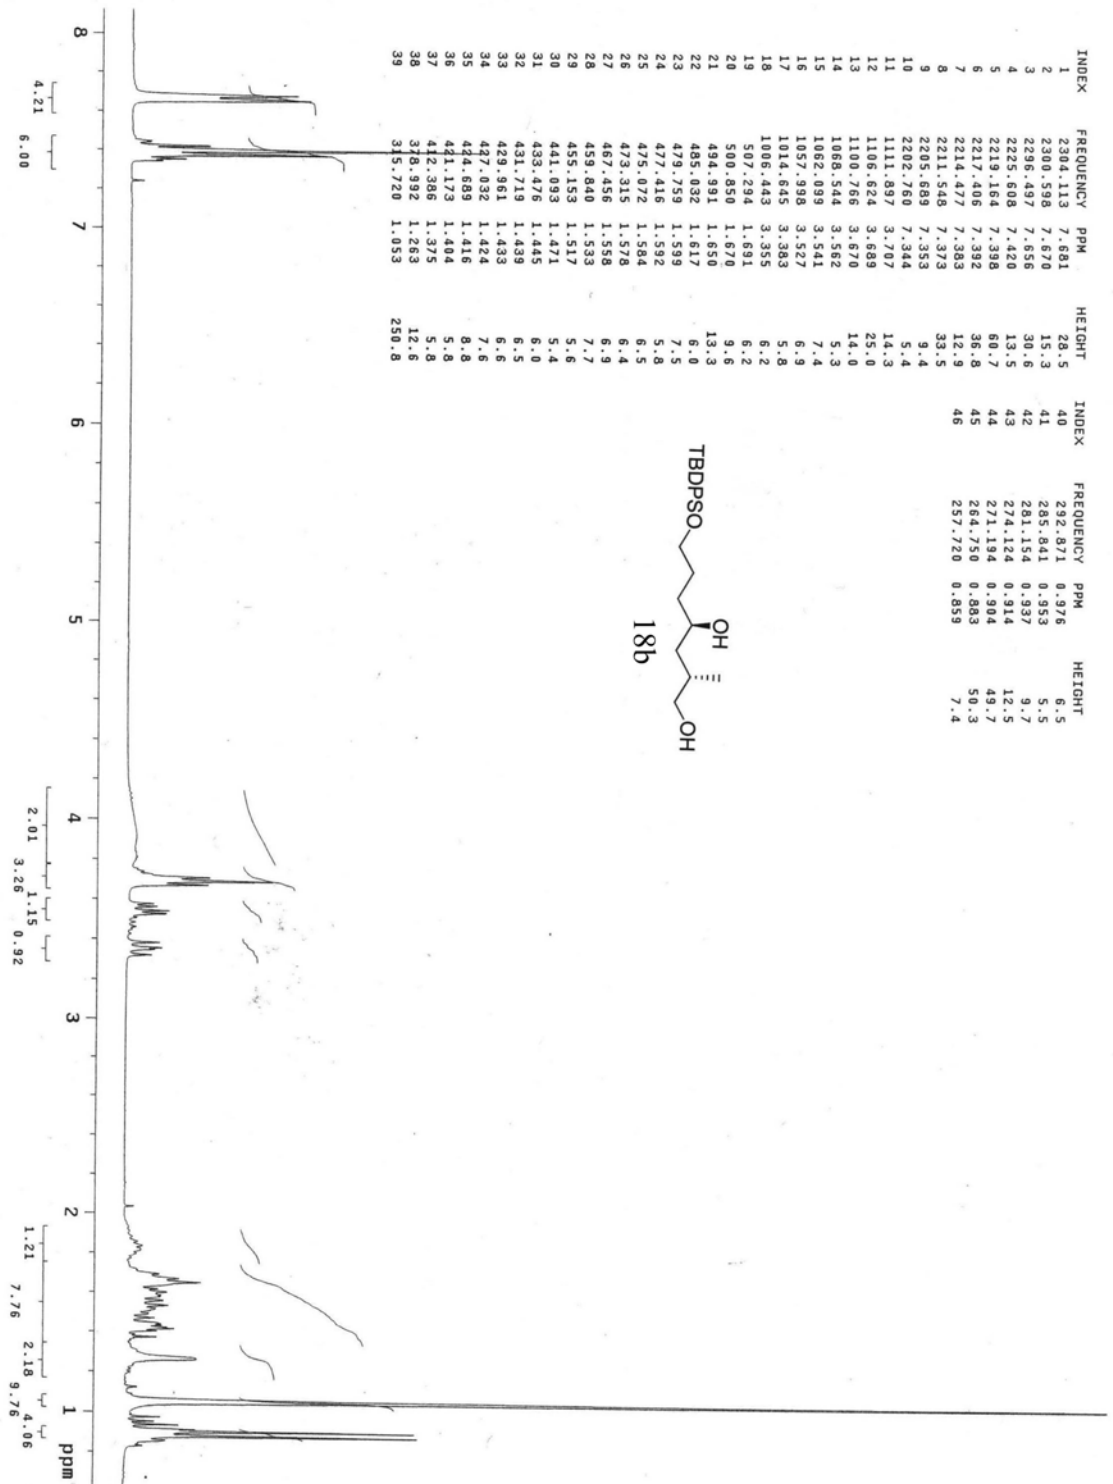

| INDEX | FREQUENCY | PPM   | HEIGHT |
|-------|-----------|-------|--------|
| 1     | 2504.113  | 7.681 | 28.5   |
| 2     | 2500.598  | 7.670 | 15.3   |
| 3     | 2296.497  | 7.656 | 18.3   |
| 4     | 2225.608  | 7.420 | 13.5   |
| 5     | 2219.164  | 7.398 | 60.7   |
| 6     | 2217.406  | 7.392 | 36.8   |
| 7     | 2214.477  | 7.383 | 12.9   |
| 8     | 2211.548  | 7.373 | 33.5   |
| 9     | 2205.689  | 7.353 | 9.4    |
| 10    | 2202.760  | 7.344 | 5.4    |
| 11    | 1111.937  | 3.707 | 14.3   |
| 12    | 1106.824  | 3.689 | 25.0   |
| 13    | 1100.766  | 3.670 | 14.0   |
| 14    | 1068.544  | 3.562 | 5.3    |
| 15    | 1062.099  | 3.541 | 7.4    |
| 16    | 1057.998  | 3.527 | 6.9    |
| 17    | 1014.645  | 3.383 | 5.8    |
| 18    | 1006.443  | 3.355 | 6.2    |
| 19    | 507.294   | 1.691 | 8.2    |
| 20    | 500.950   | 1.670 | 9.6    |
| 21    | 494.991   | 1.650 | 13.3   |
| 22    | 485.032   | 1.617 | 6.0    |
| 23    | 479.759   | 1.599 | 7.5    |
| 24    | 477.416   | 1.592 | 5.8    |
| 25    | 475.072   | 1.584 | 6.5    |
| 26    | 473.315   | 1.578 | 6.4    |
| 27    | 467.456   | 1.558 | 6.9    |
| 28    | 459.840   | 1.539 | 7.7    |
| 29    | 455.153   | 1.517 | 5.6    |
| 30    | 441.093   | 1.471 | 5.4    |
| 31    | 433.476   | 1.445 | 6.0    |
| 32    | 431.719   | 1.439 | 6.5    |
| 33    | 429.961   | 1.433 | 6.6    |
| 34    | 427.032   | 1.424 | 7.6    |
| 35    | 424.689   | 1.416 | 8.8    |
| 36    | 421.173   | 1.404 | 5.8    |
| 37    | 412.386   | 1.375 | 12.8   |
| 38    | 318.992   | 1.263 | 12.8   |
| 39    | 315.720   | 1.053 | 250.8  |

| INDEX | FREQUENCY | PPM   | HEIGHT |
|-------|-----------|-------|--------|
| 40    | 292.871   | 0.976 | 6.5    |
| 41    | 285.841   | 0.953 | 5.5    |
| 42    | 281.154   | 0.937 | 9.7    |
| 43    | 274.124   | 0.914 | 12.5   |
| 44    | 271.184   | 0.904 | 49.7   |
| 45    | 264.750   | 0.883 | 50.3   |
| 46    | 257.720   | 0.859 | 7.4    |

Integration values (from left to right): 4.21, 5.00, 2.01, 3.26, 1.15, 0.92, 1.21, 7.76, 2.18, 9.76, 4.06, 1 ppm.



| INDEX | FREQUENCY PPM | HEIGHT |
|-------|---------------|--------|
| 1     | 2339.429      | 7.739  |
| 2     | 2335.714      | 7.787  |
| 3     | 2333.311      | 7.779  |
| 4     | 2293.301      | 7.523  |
| 5     | 2291.351      | 7.521  |
| 6     | 2245.482      | 7.486  |
| 7     | 2243.735      | 7.486  |
| 8     | 2199.210      | 7.332  |
| 9     | 2192.765      | 7.310  |
| 10    | 2190.422      | 7.302  |
| 11    | 1600.466      | 5.336  |
| 12    | 1514.345      | 5.048  |
| 13    | 1506.143      | 5.021  |
| 14    | 1118.692      | 3.730  |
| 15    | 1115.963      | 3.720  |
| 16    | 915.015       | 3.050  |
| 17    | 907.984       | 3.027  |
| 18    | 743.359       | 2.478  |
| 19    | 741.016       | 2.470  |
| 20    | 640.634       | 2.136  |
| 21    | 489.684       | 1.632  |
| 22    | 484.411       | 1.615  |
| 23    | 478.552       | 1.595  |
| 24    | 457.461       | 1.525  |
| 25    | 451.603       | 1.506  |
| 26    | 446.916       | 1.490  |
| 27    | 444.573       | 1.482  |
| 28    | 353.179       | 1.177  |
| 29    | 349.604       | 1.166  |
| 30    | 335.604       | 1.119  |
| 31    | 332.674       | 1.109  |
| 32    | 329.159       | 1.097  |
| 33    | 326.230       | 1.088  |
| 34    |               | 11.0   |

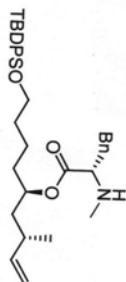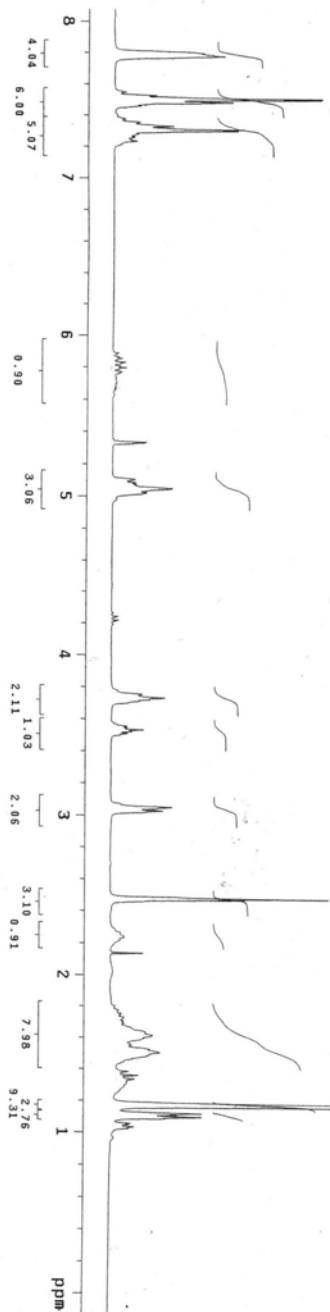

| INDEX | FREQUENCY | PPM   | HEIGHT |
|-------|-----------|-------|--------|
| 1     | 2276.634  | 7.590 | 28.3   |
| 2     | 2270.776  | 7.570 | 27.8   |
| 3     | 2269.604  | 7.566 | 27.6   |
| 4     | 2197.544  | 7.328 | 11.4   |
| 5     | 2191.685  | 7.307 | 53.9   |
| 6     | 2184.655  | 7.283 | 26.3   |
| 7     | 2146.574  | 7.158 | 10.1   |
| 8     | 2144.231  | 7.148 | 10.9   |
| 9     | 2142.473  | 7.143 | 11.0   |
| 10    | 2137.201  | 7.125 | 16.0   |
| 11    | 2128.413  | 7.096 | 20.9   |
| 12    | 2124.312  | 7.082 | 9.4    |
| 13    | 2121.383  | 7.072 | 10.5   |
| 14    | 1472.841  | 4.910 | 9.4    |
| 15    | 1457.023  | 4.857 | 13.8   |
| 16    | 1447.649  | 4.826 | 14.6   |
| 17    | 1430.073  | 4.768 | 10.2   |
| 18    | 1068.600  | 3.562 | 13.5   |
| 19    | 840.703   | 2.803 | 8.6    |
| 20    | 819.612   | 2.732 | 10.3   |
| 21    | 814.339   | 2.715 | 42.1   |
| 22    | 439.977   | 1.467 | 16.3   |
| 23    | 434.705   | 1.449 | 15.3   |
| 24    | 391.937   | 1.307 | 9.5    |
| 25    | 289.413   | 0.965 | 154.1  |
| 26    | 278.281   | 0.928 | 35.1   |
| 27    | 271.251   | 0.904 | 25.7   |
| 28    | 265.978   | 0.887 | 9.6    |
| 29    | 257.191   | 0.857 | 8.9    |
| 30    | 253.675   | 0.846 | 8.6    |
| 31    | 250.746   | 0.836 | 8.8    |
| 32    | 207.393   | 0.691 | 20.2   |
| 33    | 200.948   | 0.670 | 19.2   |

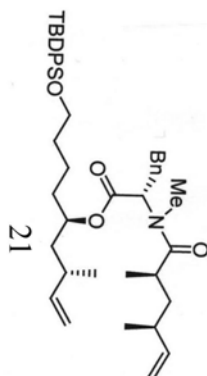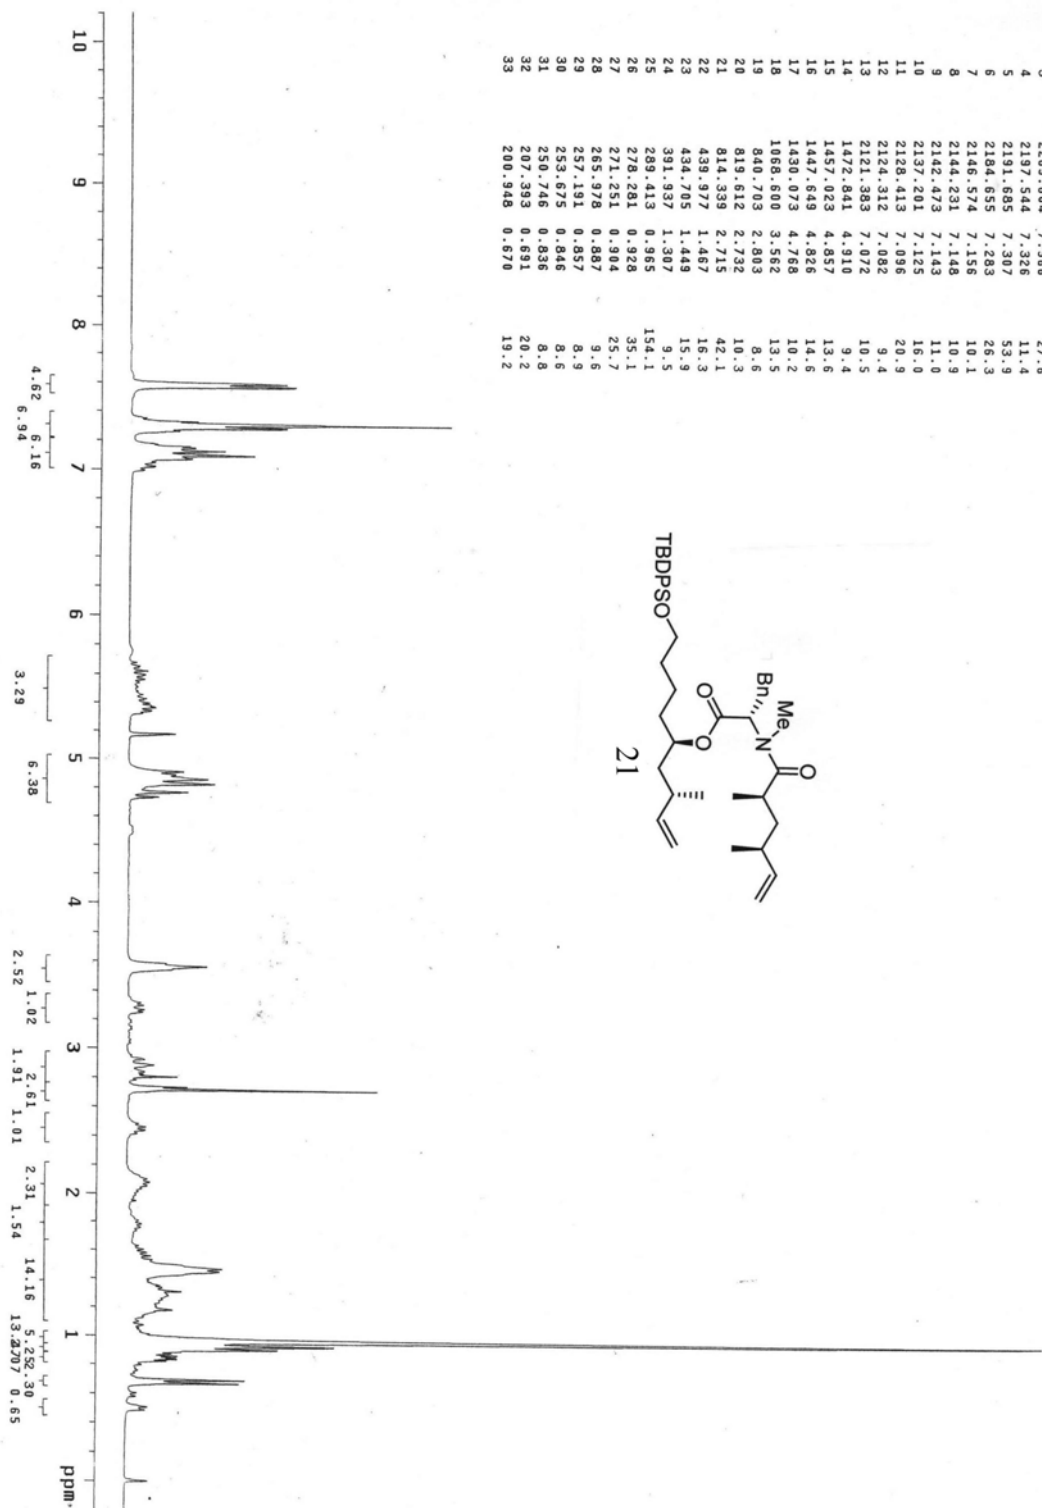

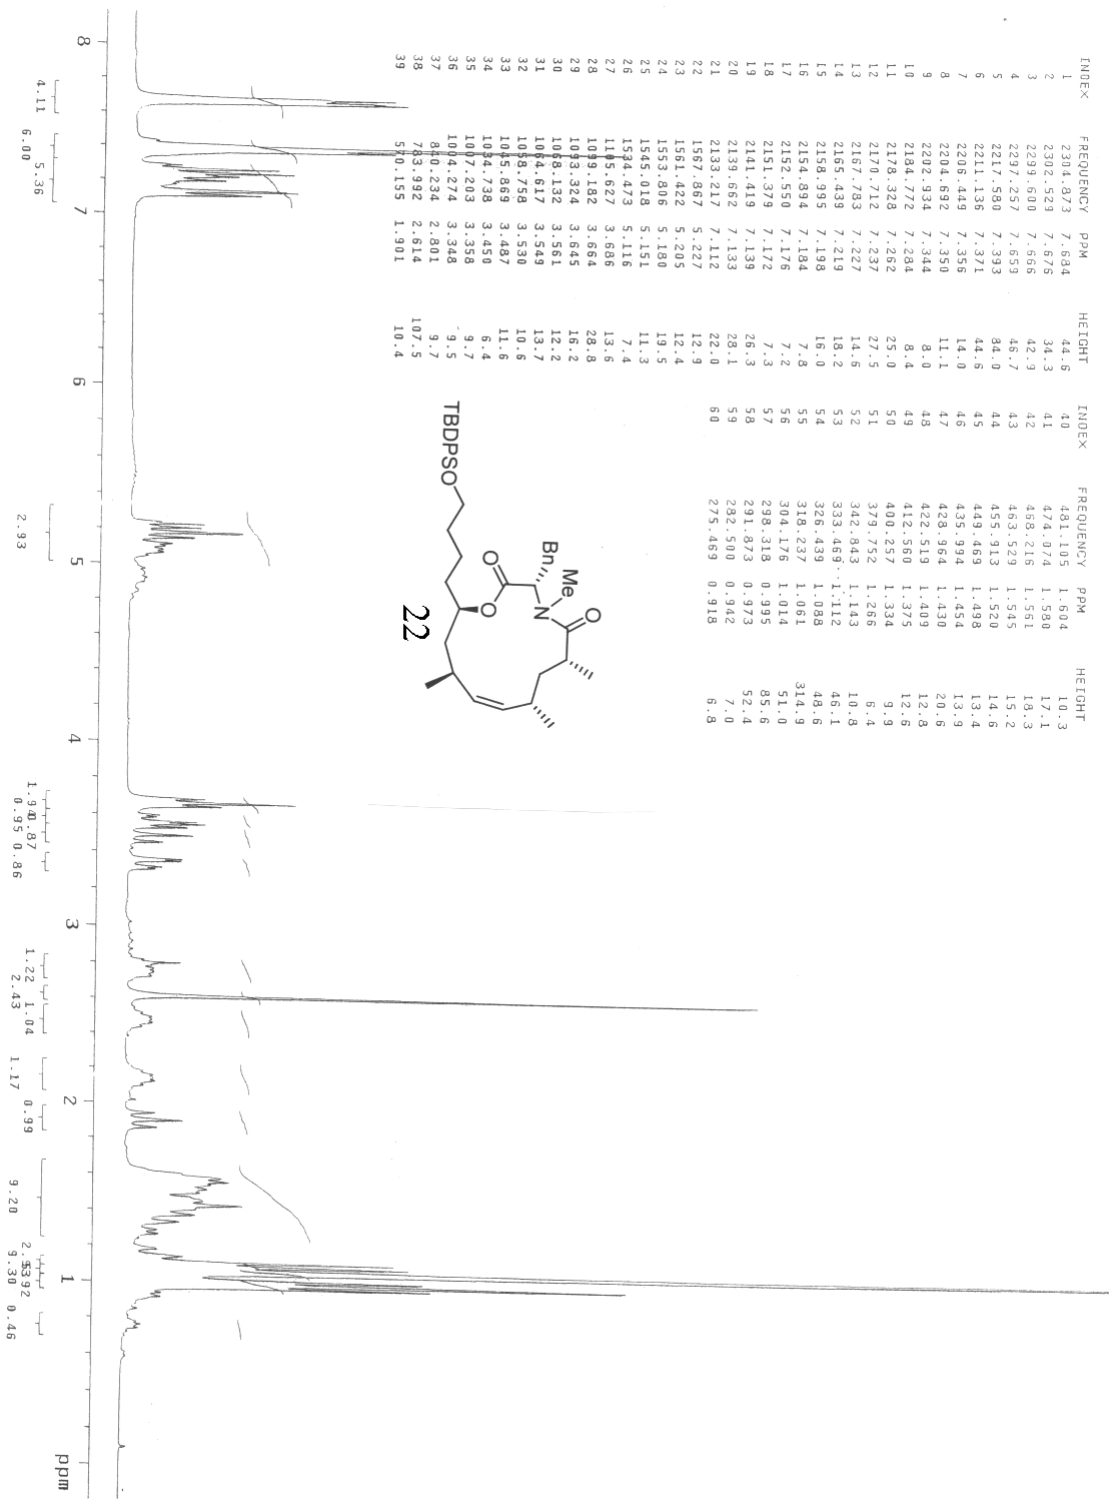

| INDEX | FREQUENCY | PPM   | HEIGHT | INDEX | FREQUENCY | PPM   | HEIGHT |
|-------|-----------|-------|--------|-------|-----------|-------|--------|
| 1     | 2304.873  | 7.634 | 44.6   | 40    | 481.105   | 1.504 | 10.3   |
| 2     | 2302.529  | 7.675 | 34.3   | 41    | 474.074   | 1.580 | 17.1   |
| 3     | 2299.600  | 7.666 | 42.9   | 42    | 468.216   | 1.551 | 19.3   |
| 4     | 2297.257  | 7.659 | 46.7   | 43    | 463.529   | 1.545 | 15.2   |
| 5     | 2217.580  | 7.393 | 84.0   | 44    | 455.913   | 1.520 | 14.6   |
| 6     | 2211.135  | 7.371 | 44.6   | 45    | 449.469   | 1.498 | 13.4   |
| 7     | 2208.449  | 7.356 | 14.0   | 46    | 439.994   | 1.454 | 13.9   |
| 8     | 2204.692  | 7.350 | 11.1   | 47    | 428.964   | 1.430 | 20.6   |
| 9     | 2202.934  | 7.344 | 8.0    | 48    | 422.519   | 1.409 | 12.8   |
| 10    | 2184.772  | 7.284 | 8.4    | 49    | 412.560   | 1.375 | 12.6   |
| 11    | 2178.328  | 7.262 | 25.0   | 50    | 400.257   | 1.334 | 9.9    |
| 12    | 2170.712  | 7.237 | 27.5   | 51    | 379.752   | 1.266 | 6.4    |
| 13    | 2167.783  | 7.227 | 14.6   | 52    | 342.843   | 1.143 | 10.8   |
| 14    | 2165.439  | 7.219 | 18.2   | 53    | 333.663   | 1.112 | 46.1   |
| 15    | 2158.995  | 7.198 | 16.0   | 54    | 326.439   | 1.088 | 48.8   |
| 16    | 2154.894  | 7.184 | 7.8    | 55    | 318.237   | 1.061 | 314.9  |
| 17    | 2152.530  | 7.176 | 7.2    | 56    | 304.176   | 1.014 | 51.0   |
| 18    | 2151.379  | 7.172 | 7.3    | 57    | 298.318   | 0.995 | 85.6   |
| 19    | 2141.419  | 7.139 | 26.3   | 58    | 291.873   | 0.973 | 52.4   |
| 20    | 2139.662  | 7.133 | 28.1   | 59    | 282.500   | 0.942 | 7.0    |
| 21    | 2133.217  | 7.112 | 22.0   | 60    | 275.469   | 0.918 | 6.8    |
| 22    | 1567.867  | 5.227 | 12.9   |       |           |       |        |
| 23    | 1561.422  | 5.205 | 12.4   |       |           |       |        |
| 24    | 1553.806  | 5.130 | 19.5   |       |           |       |        |
| 25    | 1545.018  | 5.151 | 11.3   |       |           |       |        |
| 26    | 1394.473  | 5.116 | 7.4    |       |           |       |        |
| 27    | 1185.627  | 3.686 | 13.6   |       |           |       |        |
| 28    | 1089.182  | 3.664 | 28.8   |       |           |       |        |
| 29    | 1083.324  | 3.645 | 16.2   |       |           |       |        |
| 30    | 1080.132  | 3.561 | 12.2   |       |           |       |        |
| 31    | 1084.617  | 3.549 | 13.7   |       |           |       |        |
| 32    | 1088.758  | 3.530 | 10.6   |       |           |       |        |
| 33    | 1045.669  | 3.487 | 11.6   |       |           |       |        |
| 34    | 1084.738  | 3.450 | 6.4    |       |           |       |        |
| 35    | 1087.293  | 3.398 | 9.7    |       |           |       |        |
| 36    | 1004.274  | 3.348 | 9.5    |       |           |       |        |
| 37    | 840.294   | 2.801 | 9.7    |       |           |       |        |
| 38    | 783.992   | 2.614 | 107.5  |       |           |       |        |
| 39    | 570.155   | 1.901 | 10.4   |       |           |       |        |

| INDEX | FREQUENCY | PPM     | HEIGHT |
|-------|-----------|---------|--------|
| 1     | 13307.630 | 176.436 | 9.9    |
| 2     | 12814.327 | 159.895 | 10.0   |
| 3     | 10449.149 | 138.537 | 10.4   |
| 4     | 10256.462 | 135.982 | 12.0   |
| 5     | 10222.563 | 135.533 | 14.9   |
| 6     | 10211.996 | 135.393 | 81.9   |
| 7     | 10093.419 | 133.821 | 14.4   |
| 8     | 9763.098  | 129.441 | 38.7   |
| 9     | 9754.629  | 129.329 | 28.4   |
| 10    | 9676.284  | 128.290 | 29.9   |
| 11    | 9616.995  | 127.504 | 76.8   |
| 12    | 9532.298  | 126.381 | 13.2   |
| 13    | 5839.486  | 77.421  | 11.7   |
| 14    | 5807.724  | 77.000  | 12.6   |
| 15    | 5775.963  | 76.579  | 12.6   |
| 16    | 5511.283  | 73.070  | 12.9   |
| 17    | 5036.977  | 66.781  | 13.4   |
| 18    | 4782.884  | 63.412  | 15.0   |
| 19    | 3923.969  | 44.070  | 12.2   |
| 20    | 3245.624  | 43.031  | 10.4   |
| 21    | 2961.887  | 39.269  | 11.6   |
| 22    | 2644.271  | 35.058  | 13.4   |
| 23    | 2591.336  | 34.356  | 13.2   |
| 24    | 2532.047  | 33.570  | 12.9   |
| 25    | 2438.880  | 32.335  | 15.2   |
| 26    | 2269.485  | 30.089  | 13.5   |
| 27    | 2019.627  | 26.777  | 57.8   |
| 28    | 1617.314  | 21.443  | 14.2   |
| 29    | 1496.620  | 19.842  | 15.5   |
| 30    | 1456.389  | 19.309  | 12.8   |
| 31    | 1441.567  | 19.113  | 12.5   |
| 32    | 1394.983  | 18.495  | 14.1   |

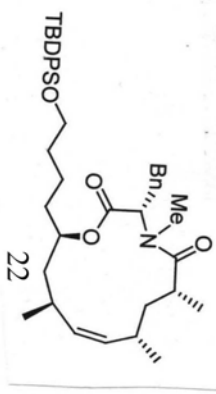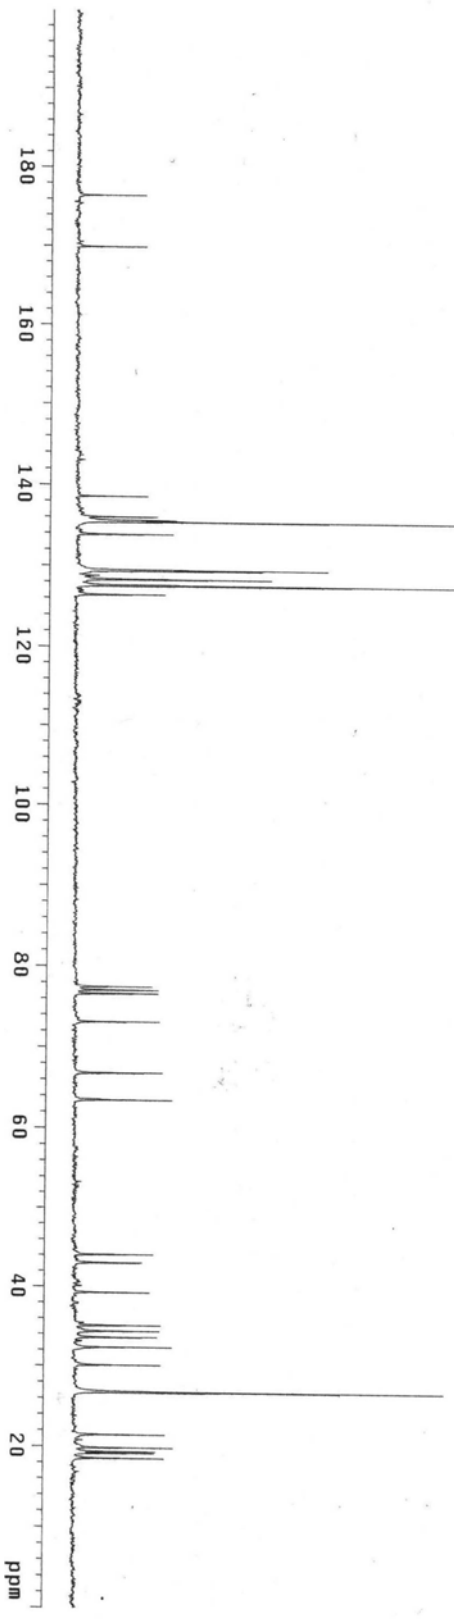



| INDEX | FREQUENCY | PPM   | HEIGHT |
|-------|-----------|-------|--------|
| 1     | 2162.978  | 7.211 | 38.4   |
| 2     | 2160.635  | 7.203 | 31.6   |
| 3     | 2155.382  | 7.186 | 43.8   |
| 4     | 2148.918  | 7.184 | 22.8   |
| 5     | 2141.888  | 7.141 | 21.9   |
| 6     | 2128.999  | 7.098 | 39.4   |
| 7     | 2127.241  | 7.092 | 44.8   |
| 8     | 2120.797  | 7.070 | 32.7   |
| 9     | 1079.146  | 3.598 | 21.6   |
| 10    | 1072.701  | 3.576 | 42.8   |
| 11    | 1066.257  | 3.555 | 22.2   |
| 12    | 1048.681  | 3.496 | 24.7   |
| 13    | 1044.580  | 3.482 | 27.8   |
| 14    | 1037.550  | 3.459 | 22.4   |
| 15    | 1024.661  | 3.416 | 24.5   |
| 16    | 770.986   | 2.570 | 198.7  |
| 17    | 469.270   | 1.564 | 22.5   |
| 18    | 465.755   | 1.553 | 21.0   |
| 19    | 463.412   | 1.545 | 21.3   |
| 20    | 459.311   | 1.531 | 32.2   |
| 21    | 455.210   | 1.518 | 38.7   |
| 22    | 453.452   | 1.512 | 38.2   |
| 23    | 448.765   | 1.486 | 28.6   |
| 24    | 448.422   | 1.486 | 31.9   |
| 25    | 445.493   | 1.479 | 32.1   |
| 26    | 440.563   | 1.469 | 28.0   |
| 27    | 434.119   | 1.447 | 20.0   |
| 28    | 408.341   | 1.361 | 21.9   |
| 29    | 400.725   | 1.336 | 24.0   |
| 30    | 397.796   | 1.326 | 28.8   |
| 31    | 393.109   | 1.311 | 25.9   |
| 32    | 315.776   | 1.053 | 84.1   |
| 33    | 306.746   | 1.029 | 86.8   |
| 34    | 246.403   | 0.828 | 170.3  |
| 35    | 241.958   | 0.807 | 159.8  |

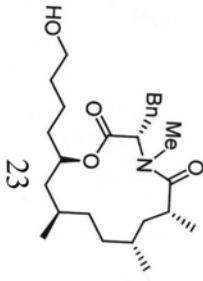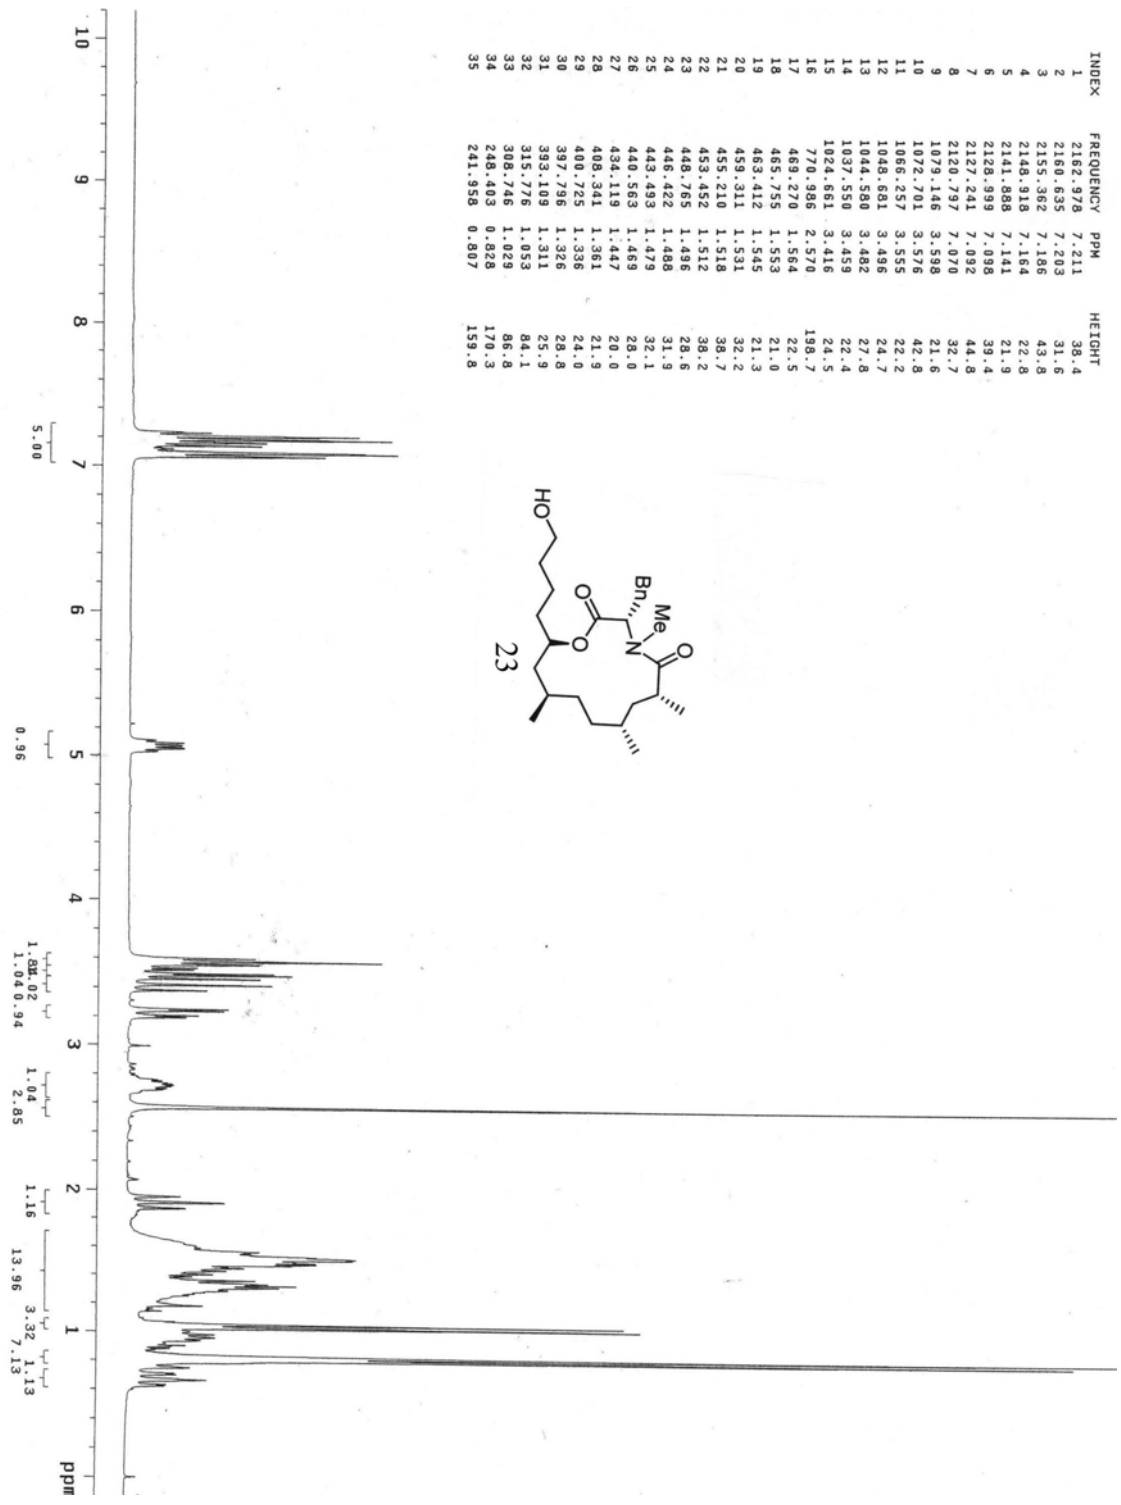

| INDEX | FREQUENCY | PPM     | HEIGHT |
|-------|-----------|---------|--------|
| 1     | 13335.216 | 176.801 | 15.0   |
| 2     | 12833.383 | 170.148 | 14.0   |
| 3     | 10459.735 | 138.677 | 14.1   |
| 4     | 9758.863  | 129.385 | 43.2   |
| 5     | 9680.518  | 128.346 | 50.9   |
| 6     | 9534.415  | 126.409 | 28.3   |
| 7     | 5839.485  | 77.421  | 50.8   |
| 8     | 5807.723  | 77.000  | 52.5   |
| 9     | 5775.982  | 76.579  | 53.0   |
| 10    | 5517.634  | 73.154  | 22.0   |
| 11    | 5041.211  | 66.837  | 29.2   |
| 12    | 4721.478  | 62.598  | 26.9   |
| 13    | 2985.178  | 39.578  | 19.8   |
| 14    | 2949.182  | 39.101  | 24.1   |
| 15    | 2786.139  | 36.939  | 23.1   |
| 16    | 2680.267  | 35.536  | 23.7   |
| 17    | 2589.217  | 34.328  | 25.9   |
| 18    | 2508.755  | 33.262  | 25.2   |
| 19    | 2453.701  | 32.532  | 22.1   |
| 20    | 2432.527  | 32.251  | 22.6   |
| 21    | 2366.886  | 31.381  | 24.7   |
| 22    | 2051.388  | 27.198  | 24.3   |
| 23    | 1810.000  | 23.997  | 25.6   |
| 24    | 1676.601  | 22.229  | 21.6   |
| 25    | 1632.135  | 21.639  | 23.8   |
| 26    | 1608.843  | 21.330  | 27.7   |
| 27    | 1411.922  | 18.720  | 24.3   |

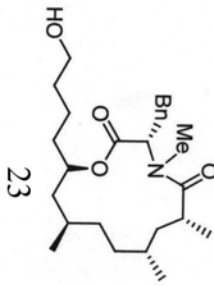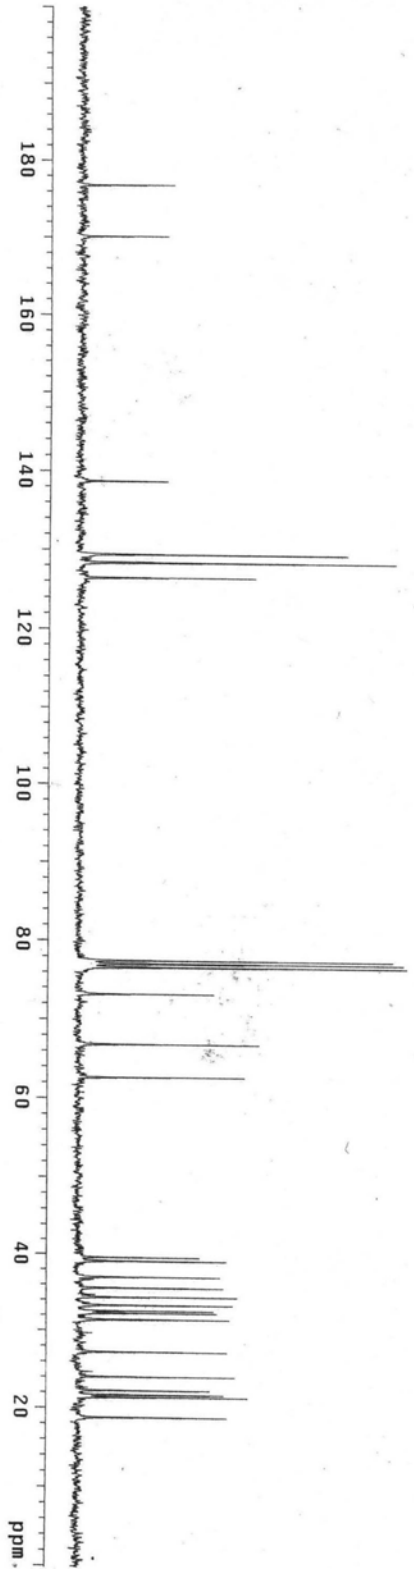



| INDEX | FREQUENCY | PPM    | HEIGHT |
|-------|-----------|--------|--------|
| 1     | 2163.564  | 7.213  | 26.2   |
| 2     | 2161.807  | 7.207  | 17.2   |
| 3     | 2159.463  | 7.199  | 14.1   |
| 4     | 2156.534  | 7.189  | 27.0   |
| 5     | 2150.090  | 7.168  | 15.3   |
| 6     | 2143.059  | 7.144  | 15.5   |
| 7     | 2128.999  | 7.098  | 25.3   |
| 8     | 2127.241  | 7.092  | 30.1   |
| 9     | 2120.797  | 7.070  | 21.3   |
| 10    | 1048.095  | 3.494  | 16.6   |
| 11    | 1044.580  | 3.482  | 20.9   |
| 12    | 1039.893  | 3.467  | 16.3   |
| 13    | 1027.005  | 3.424  | 17.2   |
| 14    | 770.986   | 2.570  | 184.8  |
| 15    | 646.784   | 2.156  | 21.3   |
| 16    | 644.441   | 2.148  | 20.9   |
| 17    | 568.866   | 1.896  | 27.4   |
| 18    | 476.301   | 1.588  | 20.6   |
| 19    | 459.856   | 1.566  | 23.3   |
| 20    | 453.998   | 1.547  | 25.0   |
| 21    | 451.695   | 1.506  | 22.3   |
| 22    | 445.230   | 1.484  | 20.5   |
| 23    | 438.220   | 1.461  | 14.2   |
| 24    | 408.341   | 1.361  | 17.5   |
| 25    | 398.382   | 1.328  | 31.9   |
| 26    | 316.948   | 1.057  | 57.1   |
| 27    | 309.918   | 1.033  | 64.1   |
| 28    | 249.574   | 0.832  | 93.4   |
| 29    | 243.716   | 0.812  | 98.2   |
| 30    | 236.100   | 0.787  | 18.1   |
| 31    | 234.342   | 0.781  | 16.5   |
| 32    | -0.000    | -0.000 | 13.5   |

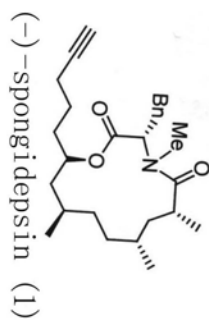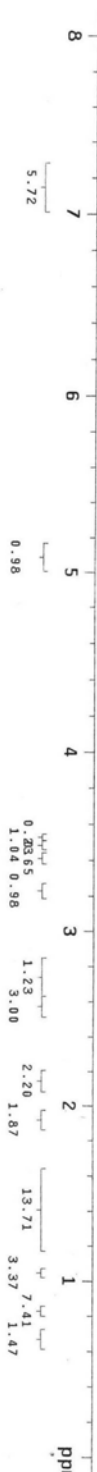

| INDEX | FREQUENCY | PPM     | HEIGHT |
|-------|-----------|---------|--------|
| 1     | 13527.099 | 179.345 | 10.5   |
| 2     | 12959.625 | 171.821 | 9.7    |
| 3     | 10522.454 | 139.509 | 9.9    |
| 4     | 9846.991  | 139.553 | 33.3   |
| 5     | 9766.529  | 129.486 | 38.3   |
| 6     | 9628.895  | 127.662 | 18.8   |
| 7     | 6382.862  | 84.625  | 7.9    |
| 8     | 5574.001  | 73.901  | 17.6   |
| 9     | 5277.560  | 69.971  | 16.8   |
| 10    | 5095.460  | 67.556  | 19.9   |
| 11    | 3759.356  | 49.842  | 20.4   |
| 12    | 3738.182  | 49.561  | 57.6   |
| 13    | 3717.008  | 49.281  | 107.7  |
| 14    | 3695.833  | 49.000  | 117.4  |
| 15    | 3672.541  | 48.691  | 94.3   |
| 16    | 3651.367  | 48.410  | 50.4   |
| 17    | 3630.193  | 48.130  | 18.4   |
| 18    | 3045.780  | 40.381  | 15.6   |
| 19    | 3039.427  | 40.297  | 17.6   |
| 20    | 2863.680  | 37.867  | 16.6   |
| 21    | 2896.402  | 35.749  | 17.6   |
| 22    | 2660.406  | 35.272  | 17.1   |
| 23    | 2599.000  | 34.458  | 19.3   |
| 24    | 2516.420  | 33.383  | 15.8   |
| 25    | 2450.780  | 32.493  | 17.8   |
| 26    | 2135.281  | 28.310  | 19.7   |
| 27    | 1921.420  | 25.475  | 17.3   |
| 28    | 1900.246  | 25.194  | 18.1   |
| 29    | 1694.854  | 22.471  | 17.5   |
| 30    | 1631.331  | 21.628  | 17.2   |
| 31    | 1428.057  | 18.933  | 36.9   |

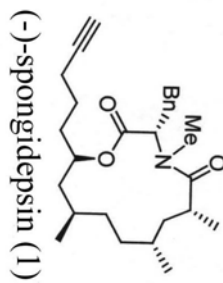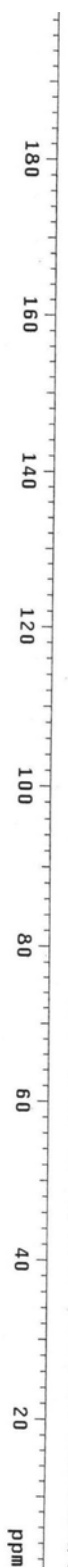

Supplement: NIHMS63849-supplement-1.pdf [file NIHMS63849-supplement-1.pdf]
